# Supplementary material for: Under Attack: Fungal Landscape of Spring Barley From Seedling Emergence to Harvest During a Severe Puccinia Hordei Epidemic
Source: Research Square preprint supplement (doi:10.21203/rs.3.rs-1007499/v1), 2021-10-29
Supplement: Supplementary file 1 [file 0b33f75eb0c9476b6d13df3a.xlsx]

## Sheet: Sheet1
Compartment	week	node	edge	pedge	nedge	Percentage_negative	most_connected_OTUs1	most_connected_OTUs2	most_connected_OTUs3
Root	Week1	52	55	42	13	23.64	OTU_24	OTU_270	OTU_37
	Week2	49	239	233	6	2.51	OTU_60	OTU_143	OTU_65
	Week3	70	360	348	12	3.33	OTU_65	OTU_44	OTU_68
	Week4	19	17	14	3	17.65	OTU_52	OTU_7	OTU_82
	Week5	77	239	208	31	12.97	OTU_68	OTU_19	OTU_49
	Week6	57	64	46	18	28.13	OTU_16	OTU_318	OTU_435
	Week7	52	94	74	20	21.28	OTU_12	OTU_435	OTU_75
	Week8	36	26	24	2	7.69	OTU_23	OTU_95	OTU_100
	Week9	73	153	132	21	13.73	OTU_219	OTU_41	OTU_46
	Week10	43	29	21	8	27.59	OTU_25	OTU_10	OTU_200
	Week11	59	77	63	14	18.18	OTU_103	OTU_24	OTU_5
	Week12	47	32	24	8	25	OTU_385	OTU_211	OTU_29
	Week13	49	71	50	21	29.58	OTU_3	OTU_4	OTU_318
	Week14	93	151	140	11	7.28	OTU_51	OTU_62	OTU_68
	Week15	71	75	60	15	20	OTU_16	OTU_62	OTU_244
	Week16	73	76	66	10	13.16	OTU_58	OTU_17	OTU_78
Shoot	Week1	13	8	6	2	25	OTU_72	OTU_9	OTU_29
	Week2	9	9	8	1	11.1111	OTU_42	OTU_21	OTU_25
	Week3	14	8	7	1	12.5	OTU_29	OTU_19	OTU_2
	Week4	6	5	4	1	20	OTU_318	OTU_435	OTU_17
	Week5	16	12	6	6	50	OTU_17	OTU_14	OTU_12
	Week6	13	13	8	5	38.4615	OTU_318	OTU_51	OTU_7
	Week7	10	9	9	0	0	OTU_23	OTU_29	OTU_25
	Week8	9	7	3	4	57.1429	OTU_8	OTU_435	OTU_12
	Week9	13	10	8	2	20	OTU_5	OTU_435	OTU_72
	Week10	17	12	11	1	8.33333	OTU_19	OTU_2	OTU_23
	Week11	9	6	5	1	16.6667	OTU_435	OTU_5	OTU_12
	Week12	21	13	10	3	23.0769	OTU_21	OTU_442	OTU_10
	Week13	31	24	18	6	25	OTU_21	OTU_25	OTU_23
	Week14	31	22	16	6	27.2727	OTU_167	OTU_74	OTU_24
	Week15	38	48	36	12	25	OTU_47	OTU_9	OTU_8
	Week16	26	18	14	4	22.2222	OTU_47	OTU_318	OTU_348
