# Supplementary material for: Under Attack: Fungal Landscape of Spring Barley From Seedling Emergence to Harvest During a Severe Puccinia Hordei Epidemic
Source: Research Square preprint supplement (doi:10.21203/rs.3.rs-1007499/v1), 2021-10-29
Supplement: Supplementary file 2 [file 568810458def7461746e3f86.xlsx]

## Sheet: mappingfull
SampleID	Dato	Week	Cultivar	PartE	PartRS	organism	Rep	SamplesNumber	Weighmg	EPlate	ERow	EColumn	SqRow	SqColumn	SqPlateA	SampleNoP1	PrimerComA	SampleIDA	SqPlateB	PrimerComB	SampleIDB	SeqOrder	SEQIDA	SEQIDB	Description	Description
WL1	2015-04-24	Week1	Cumulus	Top	Shoot	Shoot metagenome	1	1	25	1	E	8	A	9	1	1	F1R1	1A	8	F4R2	1B	Fwhlif9	F1R1Fwhlif9	F4R2Fwhlif9	F1R1Fwhlif9_F4R2Fwhlif9	F1R1Fwhlif9_F4R2Fwhlif9
WL2	2015-04-24	Week1	Cumulus	Top	Shoot	Shoot metagenome	2	2	25	6	B	6	B	11	6	2	F2R2	2A	13	F1R5	2B	Fwhlif23	F2R2Fwhlif23	F1R5Fwhlif23	F2R2Fwhlif23_F1R5Fwhlif23	F2R2Fwhlif23_F1R5Fwhlif23
WL3	2015-04-24	Week1	Cumulus	Top	Shoot	Shoot metagenome	3	3	25	3	A	8	B	10	3	3	F3R1	3A	10	F2R4	3B	Fwhlif22	F3R1Fwhlif22	F2R4Fwhlif22	F3R1Fwhlif22_F2R4Fwhlif22	F3R1Fwhlif22_F2R4Fwhlif22
WL4	2015-04-24	Week1	Cumulus	Top	Shoot	Shoot metagenome	4	4	25	4	B	12	F	3	5	4	F1R2	4A	12	F4R4	4B	Fwhlif63	F1R2Fwhlif63	F4R4Fwhlif63	F1R2Fwhlif63_F4R4Fwhlif63	F1R2Fwhlif63_F4R4Fwhlif63
WL5	2015-04-24	Week1	Cumulus	Root	Root	Root metagenome	1	5	25	5	C	7	D	11	5	5	F1R2	5A	12	F4R4	5B	Fwhlif47	F1R2Fwhlif47	F4R4Fwhlif47	F1R2Fwhlif47_F4R4Fwhlif47	F1R2Fwhlif47_F4R4Fwhlif47
WL6	2015-04-24	Week1	Cumulus	Root	Root	Root metagenome	2	6	25	5	C	12	G	4	6	6	F2R2	6A	13	F1R5	6B	Fwhlif76	F2R2Fwhlif76	F1R5Fwhlif76	F2R2Fwhlif76_F1R5Fwhlif76	F2R2Fwhlif76_F1R5Fwhlif76
WL7	2015-04-24	Week1	Cumulus	Root	Root	Root metagenome	3	7	25	4	E	12	A	4	5	7	F1R2	7A	12	F4R4	7B	Fwhlif4	F1R2Fwhlif4	F4R4Fwhlif4	F1R2Fwhlif4_F4R4Fwhlif4	F1R2Fwhlif4_F4R4Fwhlif4
WL8	2015-04-24	Week1	Cumulus	Root	Root	Root metagenome	4	8	25	4	A	5	H	7	4	8	F4R1	8A	11	F3R4	8B	Fwhlif91	F4R1Fwhlif91	F3R4Fwhlif91	F4R1Fwhlif91_F3R4Fwhlif91	F4R1Fwhlif91_F3R4Fwhlif91
WL9	2015-04-24	Week1	Quench	Top	Shoot	Shoot metagenome	1	9	25	6	G	1	D	6	6	9	F2R2	9A	13	F1R5	9B	Fwhlif42	F2R2Fwhlif42	F1R5Fwhlif42	F2R2Fwhlif42_F1R5Fwhlif42	F2R2Fwhlif42_F1R5Fwhlif42
WL10	2015-04-24	Week1	Quench	Top	Shoot	Shoot metagenome	2	10	25	1	A	12	G	12	1	10	F1R1	10A	8	F4R2	10B	Fwhlif84	F1R1Fwhlif84	F4R2Fwhlif84	F1R1Fwhlif84_F4R2Fwhlif84	F1R1Fwhlif84_F4R2Fwhlif84
WL11	2015-04-24	Week1	Quench	Top	Shoot	Shoot metagenome	3	11	25	3	C	3	B	5	3	11	F3R1	11A	10	F2R4	11B	Fwhlif17	F3R1Fwhlif17	F2R4Fwhlif17	F3R1Fwhlif17_F2R4Fwhlif17	F3R1Fwhlif17_F2R4Fwhlif17
WL12	2015-04-24	Week1	Quench	Top	Shoot	Shoot metagenome	4	12	25	1	G	12	F	1	2	12	F2R1	12A	9	F1R4	12B	Fwhlif61	F2R1Fwhlif61	F1R4Fwhlif61	F2R1Fwhlif61_F1R4Fwhlif61	F2R1Fwhlif61_F1R4Fwhlif61
WL13	2015-04-24	Week1	Quench	Root	Root	Root metagenome	1	13	25	3	B	6	C	8	3	13	F3R1	13A	10	F2R4	13B	Fwhlif32	F3R1Fwhlif32	F2R4Fwhlif32	F3R1Fwhlif32_F2R4Fwhlif32	F3R1Fwhlif32_F2R4Fwhlif32
WL14	2015-04-24	Week1	Quench	Root	Root	Root metagenome	2	14	25	4	F	12	B	4	5	14	F1R2	14A	12	F4R4	14B	Fwhlif16	F1R2Fwhlif16	F4R4Fwhlif16	F1R2Fwhlif16_F4R4Fwhlif16	F1R2Fwhlif16_F4R4Fwhlif16
WL15	2015-04-24	Week1	Quench	Root	Root	Root metagenome	3	15	25	5	B	6	C	10	5	15	F1R2	15A	12	F4R4	15B	Fwhlif34	F1R2Fwhlif34	F4R4Fwhlif34	F1R2Fwhlif34_F4R4Fwhlif34	F1R2Fwhlif34_F4R4Fwhlif34
WL16	2015-04-24	Week1	Quench	Root	Root	Root metagenome	4	16	25	6	E	12	A	6	7	16	F3R2	16A	14	F2R5	16B	Fwhlif6	F3R2Fwhlif6	F2R5Fwhlif6	F3R2Fwhlif6_F2R5Fwhlif6	F3R2Fwhlif6_F2R5Fwhlif6
WL17	2015-04-24	Week1	Milford	Top	Shoot	Shoot metagenome	1	17	25	5	C	9	E	1	6	17	F2R2	17A	13	F1R5	17B	Fwhlif49	F2R2Fwhlif49	F1R5Fwhlif49	F2R2Fwhlif49_F1R5Fwhlif49	F2R2Fwhlif49_F1R5Fwhlif49
WL18	2015-04-24	Week1	Milford	Top	Shoot	Shoot metagenome	2	18	25	6	D	3	B	8	6	18	F2R2	18A	13	F1R5	18B	Fwhlif20	F2R2Fwhlif20	F1R5Fwhlif20	F2R2Fwhlif20_F1R5Fwhlif20	F2R2Fwhlif20_F1R5Fwhlif20
WL19	2015-04-24	Week1	Milford	Top	Shoot	Shoot metagenome	3	19	25	2	G	11	D	1	3	19	F3R1	19A	10	F2R4	19B	Fwhlif37	F3R1Fwhlif37	F2R4Fwhlif37	F3R1Fwhlif37_F2R4Fwhlif37	F3R1Fwhlif37_F2R4Fwhlif37
WL20	2015-04-24	Week1	Milford	Top	Shoot	Shoot metagenome	4	20	25	4	H	8	A	12	4	20	F4R1	20A	11	F3R4	20B	Fwhlif12	F4R1Fwhlif12	F3R4Fwhlif12	F4R1Fwhlif12_F3R4Fwhlif12	F4R1Fwhlif12_F3R4Fwhlif12
WL21	2015-04-24	Week1	Milford	Root	Root	Root metagenome	1	21	25	5	E	8	G	12	5	21	F1R2	21A	12	F4R4	21B	Fwhlif84	F1R2Fwhlif84	F4R4Fwhlif84	F1R2Fwhlif84_F4R4Fwhlif84	F1R2Fwhlif84_F4R4Fwhlif84
WL22	2015-04-24	Week1	Milford	Root	Root	Root metagenome	2	22	25	1	G	11	E	12	1	22	F1R1	22A	8	F4R2	22B	Fwhlif60	F1R1Fwhlif60	F4R2Fwhlif60	F1R1Fwhlif60_F4R2Fwhlif60	F1R1Fwhlif60_F4R2Fwhlif60
WL23	2015-04-24	Week1	Milford	Root	Root	Root metagenome	3	23	25	7	H	1	E	7	7	23	F3R2	23A	14	F2R5	23B	Fwhlif55	F3R2Fwhlif55	F2R5Fwhlif55	F3R2Fwhlif55_F2R5Fwhlif55	F3R2Fwhlif55_F2R5Fwhlif55
WL24	2015-04-24	Week1	Milford	Root	Root	Root metagenome	4	24	25	7	B	6	B	12	7	24	F3R2	24A	14	F2R5	24B	Fwhlif24	F3R2Fwhlif24	F2R5Fwhlif24	F3R2Fwhlif24_F2R5Fwhlif24	F3R2Fwhlif24_F2R5Fwhlif24
WL25	2015-04-30	Week2	Cumulus	Top	Shoot	Shoot metagenome	1	25	25	1	H	10	F	11	1	25	F1R1	25A	8	F4R2	25B	Fwhlif71	F1R1Fwhlif71	F4R2Fwhlif71	F1R1Fwhlif71_F4R2Fwhlif71	F1R1Fwhlif71_F4R2Fwhlif71
WL26	2015-04-30	Week2	Cumulus	Top	Shoot	Shoot metagenome	2	26	25	4	E	1	B	4	4	26	F4R1	26A	11	F3R4	26B	Fwhlif16	F4R1Fwhlif16	F3R4Fwhlif16	F4R1Fwhlif16_F3R4Fwhlif16	F4R1Fwhlif16_F3R4Fwhlif16
WL27	2015-04-30	Week2	Cumulus	Top	Shoot	Shoot metagenome	3	27	25	3	A	2	G	3	3	27	F3R1	27A	10	F2R4	27B	Fwhlif75	F3R1Fwhlif75	F2R4Fwhlif75	F3R1Fwhlif75_F2R4Fwhlif75	F3R1Fwhlif75_F2R4Fwhlif75
WL28	2015-04-30	Week2	Cumulus	Top	Shoot	Shoot metagenome	4	28	25	6	F	12	B	6	7	28	F3R2	28A	14	F2R5	28B	Fwhlif18	F3R2Fwhlif18	F2R5Fwhlif18	F3R2Fwhlif18_F2R5Fwhlif18	F3R2Fwhlif18_F2R5Fwhlif18
WL29	2015-04-30	Week2	Cumulus	Root	Root	Root metagenome	1	29	7	2	F	6	A	8	2	29	F2R1	29A	9	F1R4	29B	Fwhlif8	F2R1Fwhlif8	F1R4Fwhlif8	F2R1Fwhlif8_F1R4Fwhlif8	F2R1Fwhlif8_F1R4Fwhlif8
WL30	2015-04-30	Week2	Cumulus	Root	Root	Root metagenome	2	30	10	3	F	11	B	2	4	30	F4R1	30A	11	F3R4	30B	Fwhlif14	F4R1Fwhlif14	F3R4Fwhlif14	F4R1Fwhlif14_F3R4Fwhlif14	F4R1Fwhlif14_F3R4Fwhlif14
WL31	2015-04-30	Week2	Cumulus	Root	Root	Root metagenome	3	31	1	5	C	10	E	2	6	31	F2R2	31A	13	F1R5	31B	Fwhlif50	F2R2Fwhlif50	F1R5Fwhlif50	F2R2Fwhlif50_F1R5Fwhlif50	F2R2Fwhlif50_F1R5Fwhlif50
WL32	2015-04-30	Week2	Cumulus	Root	Root	Root metagenome	4	32	16	5	E	6	F	10	5	32	F1R2	32A	12	F4R4	32B	Fwhlif70	F1R2Fwhlif70	F4R4Fwhlif70	F1R2Fwhlif70_F4R4Fwhlif70	F1R2Fwhlif70_F4R4Fwhlif70
WL33	2015-04-30	Week2	Quench	Top	Shoot	Shoot metagenome	1	33	25	6	H	9	C	3	7	33	F3R2	33A	14	F2R5	33B	Fwhlif27	F3R2Fwhlif27	F2R5Fwhlif27	F3R2Fwhlif27_F2R5Fwhlif27	F3R2Fwhlif27_F2R5Fwhlif27
WL34	2015-04-30	Week2	Quench	Top	Shoot	Shoot metagenome	2	34	25	2	H	2	H	3	2	34	F2R1	34A	9	F1R4	34B	Fwhlif87	F2R1Fwhlif87	F1R4Fwhlif87	F2R1Fwhlif87_F1R4Fwhlif87	F2R1Fwhlif87_F1R4Fwhlif87
WL35	2015-04-30	Week2	Quench	Top	Shoot	Shoot metagenome	3	35	25	1	C	10	H	10	1	35	F1R1	35A	8	F4R2	35B	Fwhlif94	F1R1Fwhlif94	F4R2Fwhlif94	F1R1Fwhlif94_F4R2Fwhlif94	F1R1Fwhlif94_F4R2Fwhlif94
WL36	2015-04-30	Week2	Quench	Top	Shoot	Shoot metagenome	4	36	25	5	D	8	F	12	5	36	F1R2	36A	12	F4R4	36B	Fwhlif72	F1R2Fwhlif72	F4R4Fwhlif72	F1R2Fwhlif72_F4R4Fwhlif72	F1R2Fwhlif72_F4R4Fwhlif72
WL37	2015-04-30	Week2	Quench	Root	Root	Root metagenome	1	37	18	3	E	8	G	10	3	37	F3R1	37A	10	F2R4	37B	Fwhlif82	F3R1Fwhlif82	F2R4Fwhlif82	F3R1Fwhlif82_F2R4Fwhlif82	F3R1Fwhlif82_F2R4Fwhlif82
WL38	2015-04-30	Week2	Quench	Root	Root	Root metagenome	2	38	20	6	C	8	D	1	7	38	F3R2	38A	14	F2R5	38B	Fwhlif37	F3R2Fwhlif37	F2R5Fwhlif37	F3R2Fwhlif37_F2R5Fwhlif37	F3R2Fwhlif37_F2R5Fwhlif37
WL39	2015-04-30	Week2	Quench	Root	Root	Root metagenome	3	39	23	2	G	10	D	12	2	39	F2R1	39A	9	F1R4	39B	Fwhlif48	F2R1Fwhlif48	F1R4Fwhlif48	F2R1Fwhlif48_F1R4Fwhlif48	F2R1Fwhlif48_F1R4Fwhlif48
WL40	2015-04-30	Week2	Quench	Root	Root	Root metagenome	4	40	25	3	A	11	E	1	4	40	F4R1	40A	11	F3R4	40B	Fwhlif49	F4R1Fwhlif49	F3R4Fwhlif49	F4R1Fwhlif49_F3R4Fwhlif49	F4R1Fwhlif49_F3R4Fwhlif49
WL41	2015-04-30	Week2	Milford	Top	Shoot	Shoot metagenome	1	41	25	6	B	8	C	1	7	41	F3R2	41A	14	F2R5	41B	Fwhlif25	F3R2Fwhlif25	F2R5Fwhlif25	F3R2Fwhlif25_F2R5Fwhlif25	F3R2Fwhlif25_F2R5Fwhlif25
WL42	2015-04-30	Week2	Milford	Top	Shoot	Shoot metagenome	2	42	25	4	F	5	E	8	4	42	F4R1	42A	11	F3R4	42B	Fwhlif56	F4R1Fwhlif56	F3R4Fwhlif56	F4R1Fwhlif56_F3R4Fwhlif56	F4R1Fwhlif56_F3R4Fwhlif56
WL43	2015-04-30	Week2	Milford	Top	Shoot	Shoot metagenome	3	43	25	6	E	9	H	2	7	43	F3R2	43A	14	F2R5	43B	Fwhlif86	F3R2Fwhlif86	F2R5Fwhlif86	F3R2Fwhlif86_F2R5Fwhlif86	F3R2Fwhlif86_F2R5Fwhlif86
WL44	2015-04-30	Week2	Milford	Top	Shoot	Shoot metagenome	4	44	25	4	C	8	D	11	4	44	F4R1	44A	11	F3R4	44B	Fwhlif47	F4R1Fwhlif47	F3R4Fwhlif47	F4R1Fwhlif47_F3R4Fwhlif47	F4R1Fwhlif47_F3R4Fwhlif47
WL45	2015-04-30	Week2	Milford	Root	Root	Root metagenome	1	45	25	7	A	2	F	7	7	45	F3R2	45A	14	F2R5	45B	Fwhlif67	F3R2Fwhlif67	F2R5Fwhlif67	F3R2Fwhlif67_F2R5Fwhlif67	F3R2Fwhlif67_F2R5Fwhlif67
WL46	2015-04-30	Week2	Milford	Root	Root	Root metagenome	2	46	15	1	G	1	H	1	1	46	F1R1	46A	8	F4R2	46B	Fwhlif85	F1R1Fwhlif85	F4R2Fwhlif85	F1R1Fwhlif85_F4R2Fwhlif85	F1R1Fwhlif85_F4R2Fwhlif85
WL47	2015-04-30	Week2	Milford	Root	Root	Root metagenome	3	47	25	2	A	11	F	12	2	47	F2R1	47A	9	F1R4	47B	Fwhlif72	F2R1Fwhlif72	F1R4Fwhlif72	F2R1Fwhlif72_F1R4Fwhlif72	F2R1Fwhlif72_F1R4Fwhlif72
WL48	2015-04-30	Week2	Milford	Root	Root	Root metagenome	4	48	25	2	D	12	A	2	3	48	F3R1	48A	10	F2R4	48B	Fwhlif2	F3R1Fwhlif2	F2R4Fwhlif2	F3R1Fwhlif2_F2R4Fwhlif2	F3R1Fwhlif2_F2R4Fwhlif2
WL49	2015-05-08	Week3	Cumulus	Top	Shoot	Shoot metagenome	1	49	25	3	G	2	E	4	3	49	F3R1	49A	10	F2R4	49B	Fwhlif52	F3R1Fwhlif52	F2R4Fwhlif52	F3R1Fwhlif52_F2R4Fwhlif52	F3R1Fwhlif52_F2R4Fwhlif52
WL50	2015-05-08	Week3	Cumulus	Top	Shoot	Shoot metagenome	2	50	25	2	E	2	E	3	2	50	F2R1	50A	9	F1R4	50B	Fwhlif51	F2R1Fwhlif51	F1R4Fwhlif51	F2R1Fwhlif51_F1R4Fwhlif51	F2R1Fwhlif51_F1R4Fwhlif51
WL51	2015-05-08	Week3	Cumulus	Top	Shoot	Shoot metagenome	3	51	25	6	G	10	C	4	7	51	F3R2	51A	14	F2R5	51B	Fwhlif28	F3R2Fwhlif28	F2R5Fwhlif28	F3R2Fwhlif28_F2R5Fwhlif28	F3R2Fwhlif28_F2R5Fwhlif28
WL52	2015-05-08	Week3	Cumulus	Top	Shoot	Shoot metagenome	4	52	25	3	G	9	B	12	3	52	F3R1	52A	10	F2R4	52B	Fwhlif24	F3R1Fwhlif24	F2R4Fwhlif24	F3R1Fwhlif24_F2R4Fwhlif24	F3R1Fwhlif24_F2R4Fwhlif24
WL53	2015-05-08	Week3	Cumulus	Root	Root	Root metagenome	1	53	18	5	E	10	G	2	6	53	F2R2	53A	13	F1R5	53B	Fwhlif74	F2R2Fwhlif74	F1R5Fwhlif74	F2R2Fwhlif74_F1R5Fwhlif74	F2R2Fwhlif74_F1R5Fwhlif74
WL54	2015-05-08	Week3	Cumulus	Root	Root	Root metagenome	2	54	25	2	D	3	D	4	2	54	F2R1	54A	9	F1R4	54B	Fwhlif40	F2R1Fwhlif40	F1R4Fwhlif40	F2R1Fwhlif40_F1R4Fwhlif40	F2R1Fwhlif40_F1R4Fwhlif40
WL55	2015-05-08	Week3	Cumulus	Root	Root	Root metagenome	3	55	25	7	D	1	A	7	7	55	F3R2	55A	14	F2R5	55B	Fwhlif7	F3R2Fwhlif7	F2R5Fwhlif7	F3R2Fwhlif7_F2R5Fwhlif7	F3R2Fwhlif7_F2R5Fwhlif7
WL56	2015-05-08	Week3	Cumulus	Root	Root	Root metagenome	4	56	25	5	B	4	A	8	5	56	F1R2	56A	12	F4R4	56B	Fwhlif8	F1R2Fwhlif8	F4R4Fwhlif8	F1R2Fwhlif8_F4R4Fwhlif8	F1R2Fwhlif8_F4R4Fwhlif8
WL57	2015-05-08	Week3	Quench	Top	Shoot	Shoot metagenome	1	57	25	1	E	4	G	4	1	57	F1R1	57A	8	F4R2	57B	Fwhlif76	F1R1Fwhlif76	F4R2Fwhlif76	F1R1Fwhlif76_F4R2Fwhlif76	F1R1Fwhlif76_F4R2Fwhlif76
WL58	2015-05-08	Week3	Quench	Top	Shoot	Shoot metagenome	2	58	25	4	G	11	C	3	5	58	F1R2	58A	12	F4R4	58B	Fwhlif27	F1R2Fwhlif27	F4R4Fwhlif27	F1R2Fwhlif27_F4R4Fwhlif27	F1R2Fwhlif27_F4R4Fwhlif27
WL59	2015-05-08	Week3	Quench	Top	Shoot	Shoot metagenome	3	59	25	3	H	2	G	4	3	59	F3R1	59A	10	F2R4	59B	Fwhlif76	F3R1Fwhlif76	F2R4Fwhlif76	F3R1Fwhlif76_F2R4Fwhlif76	F3R1Fwhlif76_F2R4Fwhlif76
WL60	2015-05-08	Week3	Quench	Top	Shoot	Shoot metagenome	4	60	25	5	F	8	H	12	5	60	F1R2	60A	12	F4R4	60B	Fwhlif96	F1R2Fwhlif96	F4R4Fwhlif96	F1R2Fwhlif96_F4R4Fwhlif96	F1R2Fwhlif96_F4R4Fwhlif96
WL61	2015-05-08	Week3	Quench	Root	Root	Root metagenome	1	61	18.6	4	D	9	F	12	4	61	F4R1	61A	11	F3R4	61B	Fwhlif72	F4R1Fwhlif72	F3R4Fwhlif72	F4R1Fwhlif72_F3R4Fwhlif72	F4R1Fwhlif72_F3R4Fwhlif72
WL62	2015-05-08	Week3	Quench	Root	Root	Root metagenome	2	62	25	1	G	9	D	10	1	62	F1R1	62A	8	F4R2	62B	Fwhlif46	F1R1Fwhlif46	F4R2Fwhlif46	F1R1Fwhlif46_F4R2Fwhlif46	F1R1Fwhlif46_F4R2Fwhlif46
WL63	2015-05-08	Week3	Quench	Root	Root	Root metagenome	3	63	25	3	D	6	E	8	3	63	F3R1	63A	10	F2R4	63B	Fwhlif56	F3R1Fwhlif56	F2R4Fwhlif56	F3R1Fwhlif56_F2R4Fwhlif56	F3R1Fwhlif56_F2R4Fwhlif56
WL64	2015-05-08	Week3	Quench	Root	Root	Root metagenome	4	64	25	1	D	3	F	3	1	64	F1R1	64A	8	F4R2	64B	Fwhlif63	F1R1Fwhlif63	F4R2Fwhlif63	F1R1Fwhlif63_F4R2Fwhlif63	F1R1Fwhlif63_F4R2Fwhlif63
WL65	2015-05-08	Week3	Milford	Top	Shoot	Shoot metagenome	1	65	25	2	A	9	E	10	2	65	F2R1	65A	9	F1R4	65B	Fwhlif58	F2R1Fwhlif58	F1R4Fwhlif58	F2R1Fwhlif58_F1R4Fwhlif58	F2R1Fwhlif58_F1R4Fwhlif58
WL66	2015-05-08	Week3	Milford	Top	Shoot	Shoot metagenome	2	66	25	1	C	2	D	2	1	66	F1R1	66A	8	F4R2	66B	Fwhlif38	F1R1Fwhlif38	F4R2Fwhlif38	F1R1Fwhlif38_F4R2Fwhlif38	F1R1Fwhlif38_F4R2Fwhlif38
WL67	2015-05-08	Week3	Milford	Top	Shoot	Shoot metagenome	3	67	25	6	G	5	F	10	6	67	F2R2	67A	13	F1R5	67B	Fwhlif70	F2R2Fwhlif70	F1R5Fwhlif70	F2R2Fwhlif70_F1R5Fwhlif70	F2R2Fwhlif70_F1R5Fwhlif70
WL68	2015-05-08	Week3	Milford	Top	Shoot	Shoot metagenome	4	68	25	4	E	10	H	1	5	68	F1R2	68A	12	F4R4	68B	Fwhlif85	F1R2Fwhlif85	F4R4Fwhlif85	F1R2Fwhlif85_F4R4Fwhlif85	F1R2Fwhlif85_F4R4Fwhlif85
WL69	2015-05-08	Week3	Milford	Root	Root	Root metagenome	1	69	8.5	5	D	4	C	8	5	69	F1R2	69A	12	F4R4	69B	Fwhlif32	F1R2Fwhlif32	F4R4Fwhlif32	F1R2Fwhlif32_F4R4Fwhlif32	F1R2Fwhlif32_F4R4Fwhlif32
WL70	2015-05-08	Week3	Milford	Root	Root	Root metagenome	2	70	15.8	2	E	7	H	8	2	70	F2R1	70A	9	F1R4	70B	Fwhlif92	F2R1Fwhlif92	F1R4Fwhlif92	F2R1Fwhlif92_F1R4Fwhlif92	F2R1Fwhlif92_F1R4Fwhlif92
WL71	2015-05-08	Week3	Milford	Root	Root	Root metagenome	3	71	25	6	E	10	H	3	7	71	F3R2	71A	14	F2R5	71B	Fwhlif87	F3R2Fwhlif87	F2R5Fwhlif87	F3R2Fwhlif87_F2R5Fwhlif87	F3R2Fwhlif87_F2R5Fwhlif87
WL72	2015-05-08	Week3	Milford	Root	Root	Root metagenome	4	72	21.7	5	C	4	B	8	5	72	F1R2	72A	12	F4R4	72B	Fwhlif20	F1R2Fwhlif20	F4R4Fwhlif20	F1R2Fwhlif20_F4R4Fwhlif20	F1R2Fwhlif20_F4R4Fwhlif20
WL73	2015-05-15	Week4	Cumulus	Top	Shoot	Shoot metagenome	1	73	25	6	G	11	C	5	7	73	F3R2	73A	14	F2R5	73B	Fwhlif29	F3R2Fwhlif29	F2R5Fwhlif29	F3R2Fwhlif29_F2R5Fwhlif29	F3R2Fwhlif29_F2R5Fwhlif29
WL74	2015-05-15	Week4	Cumulus	Top	Shoot	Shoot metagenome	2	74	25	1	H	8	D	9	1	74	F1R1	74A	8	F4R2	74B	Fwhlif45	F1R1Fwhlif45	F4R2Fwhlif45	F1R1Fwhlif45_F4R2Fwhlif45	F1R1Fwhlif45_F4R2Fwhlif45
WL75	2015-05-15	Week4	Cumulus	Top	Shoot	Shoot metagenome	3	75	25	6	F	1	C	6	6	75	F2R2	75A	13	F1R5	75B	Fwhlif30	F2R2Fwhlif30	F1R5Fwhlif30	F2R2Fwhlif30_F1R5Fwhlif30	F2R2Fwhlif30_F1R5Fwhlif30
WL76	2015-05-15	Week4	Cumulus	Top	Shoot	Shoot metagenome	4	76	25	6	A	6	A	11	6	76	F2R2	76A	13	F1R5	76B	Fwhlif11	F2R2Fwhlif11	F1R5Fwhlif11	F2R2Fwhlif11_F1R5Fwhlif11	F2R2Fwhlif11_F1R5Fwhlif11
WL77	2015-05-15	Week4	Cumulus	Root	Root	Root metagenome	1	77	6.8	6	G	2	E	7	6	77	F2R2	77A	13	F1R5	77B	Fwhlif55	F2R2Fwhlif55	F1R5Fwhlif55	F2R2Fwhlif55_F1R5Fwhlif55	F2R2Fwhlif55_F1R5Fwhlif55
WL78	2015-05-15	Week4	Cumulus	Root	Root	Root metagenome	2	78	25	3	H	1	F	3	3	78	F3R1	78A	10	F2R4	78B	Fwhlif63	F3R1Fwhlif63	F2R4Fwhlif63	F3R1Fwhlif63_F2R4Fwhlif63	F3R1Fwhlif63_F2R4Fwhlif63
WL79	2015-05-15	Week4	Cumulus	Root	Root	Root metagenome	3	79	25	1	H	5	C	6	1	79	F1R1	79A	8	F4R2	79B	Fwhlif30	F1R1Fwhlif30	F4R2Fwhlif30	F1R1Fwhlif30_F4R2Fwhlif30	F1R1Fwhlif30_F4R2Fwhlif30
WL80	2015-05-15	Week4	Cumulus	Root	Root	Root metagenome	4	80	6.2	6	D	11	H	4	7	80	F3R2	80A	14	F2R5	80B	Fwhlif88	F3R2Fwhlif88	F2R5Fwhlif88	F3R2Fwhlif88_F2R5Fwhlif88	F3R2Fwhlif88_F2R5Fwhlif88
WL81	2015-05-15	Week4	Quench	Top	Shoot	Shoot metagenome	1	81	25	2	G	1	G	2	2	81	F2R1	81A	9	F1R4	81B	Fwhlif74	F2R1Fwhlif74	F1R4Fwhlif74	F2R1Fwhlif74_F1R4Fwhlif74	F2R1Fwhlif74_F1R4Fwhlif74
WL82	2015-05-15	Week4	Quench	Top	Shoot	Shoot metagenome	2	82	25	4	G	4	F	7	4	82	F4R1	82A	11	F3R4	82B	Fwhlif67	F4R1Fwhlif67	F3R4Fwhlif67	F4R1Fwhlif67_F3R4Fwhlif67	F4R1Fwhlif67_F3R4Fwhlif67
WL83	2015-05-15	Week4	Quench	Top	Shoot	Shoot metagenome	3	83	25	1	E	10	B	11	1	83	F1R1	83A	8	F4R2	83B	Fwhlif23	F1R1Fwhlif23	F4R2Fwhlif23	F1R1Fwhlif23_F4R2Fwhlif23	F1R1Fwhlif23_F4R2Fwhlif23
WL84	2015-05-15	Week4	Quench	Top	Shoot	Shoot metagenome	4	84	25	6	E	8	F	1	7	84	F3R2	84A	14	F2R5	84B	Fwhlif61	F3R2Fwhlif61	F2R5Fwhlif61	F3R2Fwhlif61_F2R5Fwhlif61	F3R2Fwhlif61_F2R5Fwhlif61
WL85	2015-05-15	Week4	Quench	Root	Root	Root metagenome	1	85	7.8	5	F	7	G	11	5	85	F1R2	85A	12	F4R4	85B	Fwhlif83	F1R2Fwhlif83	F4R4Fwhlif83	F1R2Fwhlif83_F4R4Fwhlif83	F1R2Fwhlif83_F4R4Fwhlif83
WL86	2015-05-15	Week4	Quench	Root	Root	Root metagenome	2	86	25	5	D	11	G	3	6	86	F2R2	86A	13	F1R5	86B	Fwhlif75	F2R2Fwhlif75	F1R5Fwhlif75	F2R2Fwhlif75_F1R5Fwhlif75	F2R2Fwhlif75_F1R5Fwhlif75
WL87	2015-05-15	Week4	Quench	Root	Root	Root metagenome	3	87	22.7	2	C	1	C	2	2	87	F2R1	87A	9	F1R4	87B	Fwhlif26	F2R1Fwhlif26	F1R4Fwhlif26	F2R1Fwhlif26_F1R4Fwhlif26	F2R1Fwhlif26_F1R4Fwhlif26
WL88	2015-05-15	Week4	Quench	Root	Root	Root metagenome	4	88	14.8	7	F	3	D	9	7	88	F3R2	88A	14	F2R5	88B	Fwhlif45	F3R2Fwhlif45	F2R5Fwhlif45	F3R2Fwhlif45_F2R5Fwhlif45	F3R2Fwhlif45_F2R5Fwhlif45
WL89	2015-05-15	Week4	Milford	Top	Shoot	Shoot metagenome	1	89	25	7	C	1	H	6	7	89	F3R2	89A	14	F2R5	89B	Fwhlif90	F3R2Fwhlif90	F2R5Fwhlif90	F3R2Fwhlif90_F2R5Fwhlif90	F3R2Fwhlif90_F2R5Fwhlif90
WL90	2015-05-15	Week4	Milford	Top	Shoot	Shoot metagenome	2	90	25	1	F	8	B	9	1	90	F1R1	90A	8	F4R2	90B	Fwhlif21	F1R1Fwhlif21	F4R2Fwhlif21	F1R1Fwhlif21_F4R2Fwhlif21	F1R1Fwhlif21_F4R2Fwhlif21
WL91	2015-05-15	Week4	Milford	Top	Shoot	Shoot metagenome	3	91	25	6	H	6	H	11	6	91	F2R2	91A	13	F1R5	91B	Fwhlif95	F2R2Fwhlif95	F1R5Fwhlif95	F2R2Fwhlif95_F1R5Fwhlif95	F2R2Fwhlif95_F1R5Fwhlif95
WL92	2015-05-15	Week4	Milford	Top	Shoot	Shoot metagenome	4	92	25	5	D	7	E	11	5	92	F1R2	92A	12	F4R4	92B	Fwhlif59	F1R2Fwhlif59	F4R4Fwhlif59	F1R2Fwhlif59_F4R4Fwhlif59	F1R2Fwhlif59_F4R4Fwhlif59
WL93	2015-05-15	Week4	Milford	Root	Root	Root metagenome	1	93	5.3	1	G	2	H	2	1	93	F1R1	93A	8	F4R2	93B	Fwhlif86	F1R1Fwhlif86	F4R2Fwhlif86	F1R1Fwhlif86_F4R2Fwhlif86	F1R1Fwhlif86_F4R2Fwhlif86
WL94	2015-05-15	Week4	Milford	Root	Root	Root metagenome	2	94	4	4	H	11	D	3	5	94	F1R2	94A	12	F4R4	94B	Fwhlif39	F1R2Fwhlif39	F4R4Fwhlif39	F1R2Fwhlif39_F4R4Fwhlif39	F1R2Fwhlif39_F4R4Fwhlif39
WL95	2015-05-15	Week4	Milford	Root	Root	Root metagenome	3	95	25	3	H	5	H	7	3	95	F3R1	95A	10	F2R4	95B	Fwhlif91	F3R1Fwhlif91	F2R4Fwhlif91	F3R1Fwhlif91_F2R4Fwhlif91	F3R1Fwhlif91_F2R4Fwhlif91
WL96	2015-05-15	Week4	Milford	Root	Root	Root metagenome	4	96	14.3	1	H	11	F	12	1	96	F1R1	96A	8	F4R2	96B	Fwhlif72	F1R1Fwhlif72	F4R2Fwhlif72	F1R1Fwhlif72_F4R2Fwhlif72	F1R1Fwhlif72_F4R2Fwhlif72
WL97	2015-05-22	Week5	Cumulus	Top	Shoot	Shoot metagenome	1	97	25	5	H	4	H	8	5	97	F1R2	97A	12	F4R4	97B	Fwhlif92	F1R2Fwhlif92	F4R4Fwhlif92	F1R2Fwhlif92_F4R4Fwhlif92	F1R2Fwhlif92_F4R4Fwhlif92
WL98	2015-05-22	Week5	Cumulus	Top	Shoot	Shoot metagenome	2	98	25	5	A	9	C	1	6	98	F2R2	98A	13	F1R5	98B	Fwhlif25	F2R2Fwhlif25	F1R5Fwhlif25	F2R2Fwhlif25_F1R5Fwhlif25	F2R2Fwhlif25_F1R5Fwhlif25
WL99	2015-05-22	Week5	Cumulus	Top	Shoot	Shoot metagenome	3	99	25	2	E	1	E	2	2	99	F2R1	99A	9	F1R4	99B	Fwhlif50	F2R1Fwhlif50	F1R4Fwhlif50	F2R1Fwhlif50_F1R4Fwhlif50	F2R1Fwhlif50_F1R4Fwhlif50
WL100	2015-05-22	Week5	Cumulus	Top	Shoot	Shoot metagenome	4	100	25	1	A	4	C	4	1	100	F1R1	100A	8	F4R2	100B	Fwhlif28	F1R1Fwhlif28	F4R2Fwhlif28	F1R1Fwhlif28_F4R2Fwhlif28	F1R1Fwhlif28_F4R2Fwhlif28
WL101	2015-05-22	Week5	Cumulus	Root	Root	Root metagenome	1	101	25	1	B	12	H	12	1	101	F1R1	101A	8	F4R2	101B	Fwhlif96	F1R1Fwhlif96	F4R2Fwhlif96	F1R1Fwhlif96_F4R2Fwhlif96	F1R1Fwhlif96_F4R2Fwhlif96
WL102	2015-05-22	Week5	Cumulus	Root	Root	Root metagenome	2	102	25	2	B	12	G	1	3	102	F3R1	102A	10	F2R4	102B	Fwhlif73	F3R1Fwhlif73	F2R4Fwhlif73	F3R1Fwhlif73_F2R4Fwhlif73	F3R1Fwhlif73_F2R4Fwhlif73
WL103	2015-05-22	Week5	Cumulus	Root	Root	Root metagenome	3	103	25	5	H	6	A	11	5	103	F1R2	103A	12	F4R4	103B	Fwhlif11	F1R2Fwhlif11	F4R4Fwhlif11	F1R2Fwhlif11_F4R4Fwhlif11	F1R2Fwhlif11_F4R4Fwhlif11
WL104	2015-05-22	Week5	Cumulus	Root	Root	Root metagenome	4	104	25	1	C	9	H	9	1	104	F1R1	104A	8	F4R2	104B	Fwhlif93	F1R1Fwhlif93	F4R2Fwhlif93	F1R1Fwhlif93_F4R2Fwhlif93	F1R1Fwhlif93_F4R2Fwhlif93
WL105	2015-05-22	Week5	Quench	Top	Shoot	Shoot metagenome	1	105	25	6	F	5	E	10	6	105	F2R2	105A	13	F1R5	105B	Fwhlif58	F2R2Fwhlif58	F1R5Fwhlif58	F2R2Fwhlif58_F1R5Fwhlif58	F2R2Fwhlif58_F1R5Fwhlif58
WL106	2015-05-22	Week5	Quench	Top	Shoot	Shoot metagenome	2	106	25	4	H	12	D	4	5	106	F1R2	106A	12	F4R4	106B	Fwhlif40	F1R2Fwhlif40	F4R4Fwhlif40	F1R2Fwhlif40_F4R4Fwhlif40	F1R2Fwhlif40_F4R4Fwhlif40
WL107	2015-05-22	Week5	Quench	Top	Shoot	Shoot metagenome	3	107	25	2	B	2	B	3	2	107	F2R1	107A	9	F1R4	107B	Fwhlif15	F2R1Fwhlif15	F1R4Fwhlif15	F2R1Fwhlif15_F1R4Fwhlif15	F2R1Fwhlif15_F1R4Fwhlif15
WL108	2015-05-22	Week5	Quench	Top	Shoot	Shoot metagenome	4	108	25	5	B	8	D	12	5	108	F1R2	108A	12	F4R4	108B	Fwhlif48	F1R2Fwhlif48	F4R4Fwhlif48	F1R2Fwhlif48_F4R4Fwhlif48	F1R2Fwhlif48_F4R4Fwhlif48
WL109	2015-05-22	Week5	Quench	Root	Root	Root metagenome	1	109	25	2	C	11	H	12	2	109	F2R1	109A	9	F1R4	109B	Fwhlif96	F2R1Fwhlif96	F1R4Fwhlif96	F2R1Fwhlif96_F1R4Fwhlif96	F2R1Fwhlif96_F1R4Fwhlif96
WL110	2015-05-22	Week5	Quench	Root	Root	Root metagenome	2	110	25	4	F	8	G	11	4	110	F4R1	110A	11	F3R4	110B	Fwhlif83	F4R1Fwhlif83	F3R4Fwhlif83	F4R1Fwhlif83_F3R4Fwhlif83	F4R1Fwhlif83_F3R4Fwhlif83
WL111	2015-05-22	Week5	Quench	Root	Root	Root metagenome	3	111	25	5	A	2	F	5	5	111	F1R2	111A	12	F4R4	111B	Fwhlif65	F1R2Fwhlif65	F4R4Fwhlif65	F1R2Fwhlif65_F4R4Fwhlif65	F1R2Fwhlif65_F4R4Fwhlif65
WL112	2015-05-22	Week5	Quench	Root	Root	Root metagenome	4	112	25	3	D	4	C	6	3	112	F3R1	112A	10	F2R4	112B	Fwhlif30	F3R1Fwhlif30	F2R4Fwhlif30	F3R1Fwhlif30_F2R4Fwhlif30	F3R1Fwhlif30_F2R4Fwhlif30
WL113	2015-05-22	Week5	Milford	Top	Shoot	Shoot metagenome	1	113	25	2	G	4	A	6	2	113	F2R1	113A	9	F1R4	113B	Fwhlif6	F2R1Fwhlif6	F1R4Fwhlif6	F2R1Fwhlif6_F1R4Fwhlif6	F2R1Fwhlif6_F1R4Fwhlif6
WL114	2015-05-22	Week5	Milford	Top	Shoot	Shoot metagenome	2	114	25	1	A	8	E	8	1	114	F1R1	114A	8	F4R2	114B	Fwhlif56	F1R1Fwhlif56	F4R2Fwhlif56	F1R1Fwhlif56_F4R2Fwhlif56	F1R1Fwhlif56_F4R2Fwhlif56
WL115	2015-05-22	Week5	Milford	Top	Shoot	Shoot metagenome	3	115	25	2	C	7	F	8	2	115	F2R1	115A	9	F1R4	115B	Fwhlif68	F2R1Fwhlif68	F1R4Fwhlif68	F2R1Fwhlif68_F1R4Fwhlif68	F2R1Fwhlif68_F1R4Fwhlif68
WL116	2015-05-22	Week5	Milford	Top	Shoot	Shoot metagenome	4	116	25	6	G	8	A	2	7	116	F3R2	116A	14	F2R5	116B	Fwhlif2	F3R2Fwhlif2	F2R5Fwhlif2	F3R2Fwhlif2_F2R5Fwhlif2	F3R2Fwhlif2_F2R5Fwhlif2
WL117	2015-05-22	Week5	Milford	Root	Root	Root metagenome	1	117	25	1	D	4	F	4	1	117	F1R1	117A	8	F4R2	117B	Fwhlif64	F1R1Fwhlif64	F4R2Fwhlif64	F1R1Fwhlif64_F4R2Fwhlif64	F1R1Fwhlif64_F4R2Fwhlif64
WL118	2015-05-22	Week5	Milford	Root	Root	Root metagenome	2	118	25	4	C	11	G	2	5	118	F1R2	118A	12	F4R4	118B	Fwhlif74	F1R2Fwhlif74	F4R4Fwhlif74	F1R2Fwhlif74_F4R4Fwhlif74	F1R2Fwhlif74_F4R4Fwhlif74
WL119	2015-05-22	Week5	Milford	Root	Root	Root metagenome	3	119	25	7	F	4	E	10	7	119	F3R2	119A	14	F2R5	119B	Fwhlif58	F3R2Fwhlif58	F2R5Fwhlif58	F3R2Fwhlif58_F2R5Fwhlif58	F3R2Fwhlif58_F2R5Fwhlif58
WL120	2015-05-22	Week5	Milford	Root	Root	Root metagenome	4	120	12.8	7	C	6	C	12	7	120	F3R2	120A	14	F2R5	120B	Fwhlif36	F3R2Fwhlif36	F2R5Fwhlif36	F3R2Fwhlif36_F2R5Fwhlif36	F3R2Fwhlif36_F2R5Fwhlif36
WL121	2015-05-29	Week6	Cumulus	Top	Shoot	Shoot metagenome	1	121	25	7	F	1	C	7	7	121	F3R2	121A	14	F2R5	121B	Fwhlif31	F3R2Fwhlif31	F2R5Fwhlif31	F3R2Fwhlif31_F2R5Fwhlif31	F3R2Fwhlif31_F2R5Fwhlif31
WL122	2015-05-29	Week6	Cumulus	Top	Shoot	Shoot metagenome	2	122	25	5	F	6	G	10	5	122	F1R2	122A	12	F4R4	122B	Fwhlif82	F1R2Fwhlif82	F4R4Fwhlif82	F1R2Fwhlif82_F4R4Fwhlif82	F1R2Fwhlif82_F4R4Fwhlif82
WL123	2015-05-29	Week6	Cumulus	Top	Shoot	Shoot metagenome	3	123	25	2	E	6	H	7	2	123	F2R1	123A	9	F1R4	123B	Fwhlif91	F2R1Fwhlif91	F1R4Fwhlif91	F2R1Fwhlif91_F1R4Fwhlif91	F2R1Fwhlif91_F1R4Fwhlif91
WL124	2015-05-29	Week6	Cumulus	Top	Shoot	Shoot metagenome	4	124	25	6	F	2	D	7	6	124	F2R2	124A	13	F1R5	124B	Fwhlif43	F2R2Fwhlif43	F1R5Fwhlif43	F2R2Fwhlif43_F1R5Fwhlif43	F2R2Fwhlif43_F1R5Fwhlif43
WL125	2015-05-29	Week6	Cumulus	Root	Root	Root metagenome	1	125	25	3	E	1	C	3	3	125	F3R1	125A	10	F2R4	125B	Fwhlif27	F3R1Fwhlif27	F2R4Fwhlif27	F3R1Fwhlif27_F2R4Fwhlif27	F3R1Fwhlif27_F2R4Fwhlif27
WL126	2015-05-29	Week6	Cumulus	Root	Root	Root metagenome	2	126	25	7	B	2	G	7	7	126	F3R2	126A	14	F2R5	126B	Fwhlif79	F3R2Fwhlif79	F2R5Fwhlif79	F3R2Fwhlif79_F2R5Fwhlif79	F3R2Fwhlif79_F2R5Fwhlif79
WL127	2015-05-29	Week6	Cumulus	Root	Root	Root metagenome	3	127	25	5	G	11	C	4	6	127	F2R2	127A	13	F1R5	127B	Fwhlif28	F2R2Fwhlif28	F1R5Fwhlif28	F2R2Fwhlif28_F1R5Fwhlif28	F2R2Fwhlif28_F1R5Fwhlif28
WL128	2015-05-29	Week6	Cumulus	Root	Root	Root metagenome	4	128	25	3	B	2	H	3	3	128	F3R1	128A	10	F2R4	128B	Fwhlif87	F3R1Fwhlif87	F2R4Fwhlif87	F3R1Fwhlif87_F2R4Fwhlif87	F3R1Fwhlif87_F2R4Fwhlif87
WL129	2015-05-29	Week6	Quench	Top	Shoot	Shoot metagenome	1	129	25	6	D	7	E	12	6	129	F2R2	129A	13	F1R5	129B	Fwhlif60	F2R2Fwhlif60	F1R5Fwhlif60	F2R2Fwhlif60_F1R5Fwhlif60	F2R2Fwhlif60_F1R5Fwhlif60
WL130	2015-05-29	Week6	Quench	Top	Shoot	Shoot metagenome	2	130	25	6	B	12	F	5	7	130	F3R2	130A	14	F2R5	130B	Fwhlif65	F3R2Fwhlif65	F2R5Fwhlif65	F3R2Fwhlif65_F2R5Fwhlif65	F3R2Fwhlif65_F2R5Fwhlif65
WL131	2015-05-29	Week6	Quench	Top	Shoot	Shoot metagenome	3	131	25	5	B	9	D	1	6	131	F2R2	131A	13	F1R5	131B	Fwhlif37	F2R2Fwhlif37	F1R5Fwhlif37	F2R2Fwhlif37_F1R5Fwhlif37	F2R2Fwhlif37_F1R5Fwhlif37
WL132	2015-05-29	Week6	Quench	Top	Shoot	Shoot metagenome	4	132	25	5	C	6	D	10	5	132	F1R2	132A	12	F4R4	132B	Fwhlif46	F1R2Fwhlif46	F4R4Fwhlif46	F1R2Fwhlif46_F4R4Fwhlif46	F1R2Fwhlif46_F4R4Fwhlif46
WL133	2015-05-29	Week6	Quench	Root	Root	Root metagenome	1	133	25	1	D	9	A	10	1	133	F1R1	133A	8	F4R2	133B	Fwhlif10	F1R1Fwhlif10	F4R2Fwhlif10	F1R1Fwhlif10_F4R2Fwhlif10	F1R1Fwhlif10_F4R2Fwhlif10
WL134	2015-05-29	Week6	Quench	Root	Root	Root metagenome	2	134	25	2	A	1	H	1	2	134	F2R1	134A	9	F1R4	134B	Fwhlif85	F2R1Fwhlif85	F1R4Fwhlif85	F2R1Fwhlif85_F1R4Fwhlif85	F2R1Fwhlif85_F1R4Fwhlif85
WL135	2015-05-29	Week6	Quench	Root	Root	Root metagenome	3	135	25	6	H	4	G	9	6	135	F2R2	135A	13	F1R5	135B	Fwhlif81	F2R2Fwhlif81	F1R5Fwhlif81	F2R2Fwhlif81_F1R5Fwhlif81	F2R2Fwhlif81_F1R5Fwhlif81
WL136	2015-05-29	Week6	Quench	Root	Root	Root metagenome	4	136	25	4	B	10	E	1	5	136	F1R2	136A	12	F4R4	136B	Fwhlif49	F1R2Fwhlif49	F4R4Fwhlif49	F1R2Fwhlif49_F4R4Fwhlif49	F1R2Fwhlif49_F4R4Fwhlif49
WL137	2015-05-29	Week6	Milford	Top	Shoot	Shoot metagenome	1	137	25	6	A	10	D	3	7	137	F3R2	137A	14	F2R5	137B	Fwhlif39	F3R2Fwhlif39	F2R5Fwhlif39	F3R2Fwhlif39_F2R5Fwhlif39	F3R2Fwhlif39_F2R5Fwhlif39
WL138	2015-05-29	Week6	Milford	Top	Shoot	Shoot metagenome	2	138	25	5	D	9	F	1	6	138	F2R2	138A	13	F1R5	138B	Fwhlif61	F2R2Fwhlif61	F1R5Fwhlif61	F2R2Fwhlif61_F1R5Fwhlif61	F2R2Fwhlif61_F1R5Fwhlif61
WL139	2015-05-29	Week6	Milford	Top	Shoot	Shoot metagenome	3	139	25	5	G	5	G	9	5	139	F1R2	139A	12	F4R4	139B	Fwhlif81	F1R2Fwhlif81	F4R4Fwhlif81	F1R2Fwhlif81_F4R4Fwhlif81	F1R2Fwhlif81_F4R4Fwhlif81
WL140	2015-05-29	Week6	Milford	Top	Shoot	Shoot metagenome	4	140	25	3	F	2	D	4	3	140	F3R1	140A	10	F2R4	140B	Fwhlif40	F3R1Fwhlif40	F2R4Fwhlif40	F3R1Fwhlif40_F2R4Fwhlif40	F3R1Fwhlif40_F2R4Fwhlif40
WL141	2015-05-29	Week6	Milford	Root	Root	Root metagenome	1	141	25	3	A	7	B	9	3	141	F3R1	141A	10	F2R4	141B	Fwhlif21	F3R1Fwhlif21	F2R4Fwhlif21	F3R1Fwhlif21_F2R4Fwhlif21	F3R1Fwhlif21_F2R4Fwhlif21
WL142	2015-05-29	Week6	Milford	Root	Root	Root metagenome	2	142	25	5	A	3	G	6	5	142	F1R2	142A	12	F4R4	142B	Fwhlif78	F1R2Fwhlif78	F4R4Fwhlif78	F1R2Fwhlif78_F4R4Fwhlif78	F1R2Fwhlif78_F4R4Fwhlif78
WL143	2015-05-29	Week6	Milford	Root	Root	Root metagenome	3	143	25	6	A	2	F	6	6	143	F2R2	143A	13	F1R5	143B	Fwhlif66	F2R2Fwhlif66	F1R5Fwhlif66	F2R2Fwhlif66_F1R5Fwhlif66	F2R2Fwhlif66_F1R5Fwhlif66
WL144	2015-05-29	Week6	Milford	Root	Root	Root metagenome	4	144	25	1	C	6	F	6	1	144	F1R1	144A	8	F4R2	144B	Fwhlif66	F1R1Fwhlif66	F4R2Fwhlif66	F1R1Fwhlif66_F4R2Fwhlif66	F1R1Fwhlif66_F4R2Fwhlif66
WL145	2015-06-04	Week7	Cumulus	Leaves	Shoot	Shoot metagenome	1	145	25	5	B	3	H	6	5	145	F1R2	145A	12	F4R4	145B	Fwhlif90	F1R2Fwhlif90	F4R4Fwhlif90	F1R2Fwhlif90_F4R4Fwhlif90	F1R2Fwhlif90_F4R4Fwhlif90
WL146	2015-06-04	Week7	Cumulus	Leaves	Shoot	Shoot metagenome	2	146	25	7	E	2	B	8	7	146	F3R2	146A	14	F2R5	146B	Fwhlif20	F3R2Fwhlif20	F2R5Fwhlif20	F3R2Fwhlif20_F2R5Fwhlif20	F3R2Fwhlif20_F2R5Fwhlif20
WL147	2015-06-04	Week7	Cumulus	Leaves	Shoot	Shoot metagenome	3	147	25	3	D	9	G	11	3	147	F3R1	147A	10	F2R4	147B	Fwhlif83	F3R1Fwhlif83	F2R4Fwhlif83	F3R1Fwhlif83_F2R4Fwhlif83	F3R1Fwhlif83_F2R4Fwhlif83
WL148	2015-06-04	Week7	Cumulus	Leaves	Shoot	Shoot metagenome	4	148	25	4	A	8	B	11	4	148	F4R1	148A	11	F3R4	148B	Fwhlif23	F4R1Fwhlif23	F3R4Fwhlif23	F4R1Fwhlif23_F3R4Fwhlif23	F4R1Fwhlif23_F3R4Fwhlif23
WL149	2015-06-04	Week7	Cumulus	Root	Root	Root metagenome	1	149	25	1	C	12	A	1	2	149	F2R1	149A	9	F1R4	149B	Fwhlif1	F2R1Fwhlif1	F1R4Fwhlif1	F2R1Fwhlif1_F1R4Fwhlif1	F2R1Fwhlif1_F1R4Fwhlif1
WL150	2015-06-04	Week7	Cumulus	Root	Root	Root metagenome	2	150	25	4	A	9	B	12	4	150	F4R1	150A	11	F3R4	150B	Fwhlif24	F4R1Fwhlif24	F3R4Fwhlif24	F4R1Fwhlif24_F3R4Fwhlif24	F4R1Fwhlif24_F3R4Fwhlif24
WL151	2015-06-04	Week7	Cumulus	Root	Root	Root metagenome	3	151	25	3	G	8	B	11	3	151	F3R1	151A	10	F2R4	151B	Fwhlif23	F3R1Fwhlif23	F2R4Fwhlif23	F3R1Fwhlif23_F2R4Fwhlif23	F3R1Fwhlif23_F2R4Fwhlif23
WL152	2015-06-04	Week7	Cumulus	Root	Root	Root metagenome	4	152	25	7	C	3	A	9	7	152	F3R2	152A	14	F2R5	152B	Fwhlif9	F3R2Fwhlif9	F2R5Fwhlif9	F3R2Fwhlif9_F2R5Fwhlif9	F3R2Fwhlif9_F2R5Fwhlif9
WL153	2015-06-04	Week7	Cumulus	Stem	Stem	Shoot metagenome	1	153	25	4	F	3	D	6	4	153	F4R1	153A	11	F3R4	153B	Fwhlif42	F4R1Fwhlif42	F3R4Fwhlif42	F4R1Fwhlif42_F3R4Fwhlif42	F4R1Fwhlif42_F3R4Fwhlif42
WL154	2015-06-04	Week7	Cumulus	Stem	Stem	Shoot metagenome	2	154	25	6	H	10	D	4	7	154	F3R2	154A	14	F2R5	154B	Fwhlif40	F3R2Fwhlif40	F2R5Fwhlif40	F3R2Fwhlif40_F2R5Fwhlif40	F3R2Fwhlif40_F2R5Fwhlif40
WL155	2015-06-04	Week7	Cumulus	Stem	Stem	Shoot metagenome	3	155	25	6	D	1	A	6	6	155	F2R2	155A	13	F1R5	155B	Fwhlif6	F2R2Fwhlif6	F1R5Fwhlif6	F2R2Fwhlif6_F1R5Fwhlif6	F2R2Fwhlif6_F1R5Fwhlif6
WL156	2015-06-04	Week7	Cumulus	Stem	Stem	Shoot metagenome	4	156	25	4	E	6	E	9	4	156	F4R1	156A	11	F3R4	156B	Fwhlif57	F4R1Fwhlif57	F3R4Fwhlif57	F4R1Fwhlif57_F3R4Fwhlif57	F4R1Fwhlif57_F3R4Fwhlif57
WL157	2015-06-04	Week7	Quench	Leaves	Shoot	Shoot metagenome	1	157	25	6	E	1	B	6	6	157	F2R2	157A	13	F1R5	157B	Fwhlif18	F2R2Fwhlif18	F1R5Fwhlif18	F2R2Fwhlif18_F1R5Fwhlif18	F2R2Fwhlif18_F1R5Fwhlif18
WL158	2015-06-04	Week7	Quench	Leaves	Shoot	Shoot metagenome	2	158	25	6	C	5	B	10	6	158	F2R2	158A	13	F1R5	158B	Fwhlif22	F2R2Fwhlif22	F1R5Fwhlif22	F2R2Fwhlif22_F1R5Fwhlif22	F2R2Fwhlif22_F1R5Fwhlif22
WL159	2015-06-04	Week7	Quench	Leaves	Shoot	Shoot metagenome	3	159	25	4	G	1	D	4	4	159	F4R1	159A	11	F3R4	159B	Fwhlif40	F4R1Fwhlif40	F3R4Fwhlif40	F4R1Fwhlif40_F3R4Fwhlif40	F4R1Fwhlif40_F3R4Fwhlif40
WL160	2015-06-04	Week7	Quench	Leaves	Shoot	Shoot metagenome	4	160	25	6	D	6	D	11	6	160	F2R2	160A	13	F1R5	160B	Fwhlif47	F2R2Fwhlif47	F1R5Fwhlif47	F2R2Fwhlif47_F1R5Fwhlif47	F2R2Fwhlif47_F1R5Fwhlif47
WL161	2015-06-04	Week7	Quench	Root	Root	Root metagenome	1	161	25	1	D	10	A	11	1	161	F1R1	161A	8	F4R2	161B	Fwhlif11	F1R1Fwhlif11	F4R2Fwhlif11	F1R1Fwhlif11_F4R2Fwhlif11	F1R1Fwhlif11_F4R2Fwhlif11
WL162	2015-06-04	Week7	Quench	Root	Root	Root metagenome	2	162	25	4	E	2	C	5	4	162	F4R1	162A	11	F3R4	162B	Fwhlif29	F4R1Fwhlif29	F3R4Fwhlif29	F4R1Fwhlif29_F3R4Fwhlif29	F4R1Fwhlif29_F3R4Fwhlif29
WL163	2015-06-04	Week7	Quench	Root	Root	Root metagenome	3	163	25	1	H	4	B	5	1	163	F1R1	163A	8	F4R2	163B	Fwhlif17	F1R1Fwhlif17	F4R2Fwhlif17	F1R1Fwhlif17_F4R2Fwhlif17	F1R1Fwhlif17_F4R2Fwhlif17
WL164	2015-06-04	Week7	Quench	Root	Root	Root metagenome	4	164	25	1	G	10	E	11	1	164	F1R1	164A	8	F4R2	164B	Fwhlif59	F1R1Fwhlif59	F4R2Fwhlif59	F1R1Fwhlif59_F4R2Fwhlif59	F1R1Fwhlif59_F4R2Fwhlif59
WL165	2015-06-04	Week7	Quench	Stem	Stem	Shoot metagenome	1	165	25	5	E	2	C	6	5	165	F1R2	165A	12	F4R4	165B	Fwhlif30	F1R2Fwhlif30	F4R4Fwhlif30	F1R2Fwhlif30_F4R4Fwhlif30	F1R2Fwhlif30_F4R4Fwhlif30
WL166	2015-06-04	Week7	Quench	Stem	Stem	Shoot metagenome	2	166	25	7	A	5	H	10	7	166	F3R2	166A	14	F2R5	166B	Fwhlif94	F3R2Fwhlif94	F2R5Fwhlif94	F3R2Fwhlif94_F2R5Fwhlif94	F3R2Fwhlif94_F2R5Fwhlif94
WL167	2015-06-04	Week7	Quench	Stem	Stem	Shoot metagenome	3	167	25	4	H	7	A	11	4	167	F4R1	167A	11	F3R4	167B	Fwhlif11	F4R1Fwhlif11	F3R4Fwhlif11	F4R1Fwhlif11_F3R4Fwhlif11	F4R1Fwhlif11_F3R4Fwhlif11
WL168	2015-06-04	Week7	Quench	Stem	Stem	Shoot metagenome	4	168	25	4	A	2	F	4	4	168	F4R1	168A	11	F3R4	168B	Fwhlif64	F4R1Fwhlif64	F3R4Fwhlif64	F4R1Fwhlif64_F3R4Fwhlif64	F4R1Fwhlif64_F3R4Fwhlif64
WL169	2015-06-04	Week7	Milford	Leaves	Shoot	Shoot metagenome	1	169	25	4	F	11	B	3	5	169	F1R2	169A	12	F4R4	169B	Fwhlif15	F1R2Fwhlif15	F4R4Fwhlif15	F1R2Fwhlif15_F4R4Fwhlif15	F1R2Fwhlif15_F4R4Fwhlif15
WL170	2015-06-04	Week7	Milford	Leaves	Shoot	Shoot metagenome	2	170	25	4	H	1	E	4	4	170	F4R1	170A	11	F3R4	170B	Fwhlif52	F4R1Fwhlif52	F3R4Fwhlif52	F4R1Fwhlif52_F3R4Fwhlif52	F4R1Fwhlif52_F3R4Fwhlif52
WL171	2015-06-04	Week7	Milford	Leaves	Shoot	Shoot metagenome	3	171	25	4	B	9	C	12	4	171	F4R1	171A	11	F3R4	171B	Fwhlif36	F4R1Fwhlif36	F3R4Fwhlif36	F4R1Fwhlif36_F3R4Fwhlif36	F4R1Fwhlif36_F3R4Fwhlif36
WL172	2015-06-04	Week7	Milford	Leaves	Shoot	Shoot metagenome	4	172	25	3	H	11	D	2	4	172	F4R1	172A	11	F3R4	172B	Fwhlif38	F4R1Fwhlif38	F3R4Fwhlif38	F4R1Fwhlif38_F3R4Fwhlif38	F4R1Fwhlif38_F3R4Fwhlif38
WL173	2015-06-04	Week7	Milford	Root	Root	Root metagenome	1	173	25	1	D	6	G	6	1	173	F1R1	173A	8	F4R2	173B	Fwhlif78	F1R1Fwhlif78	F4R2Fwhlif78	F1R1Fwhlif78_F4R2Fwhlif78	F1R1Fwhlif78_F4R2Fwhlif78
WL174	2015-06-04	Week7	Milford	Root	Root	Root metagenome	2	174	25	5	F	9	H	1	6	174	F2R2	174A	13	F1R5	174B	Fwhlif85	F2R2Fwhlif85	F1R5Fwhlif85	F2R2Fwhlif85_F1R5Fwhlif85	F2R2Fwhlif85_F1R5Fwhlif85
WL175	2015-06-04	Week7	Milford	Root	Root	Root metagenome	3	175	25	3	C	2	A	4	3	175	F3R1	175A	10	F2R4	175B	Fwhlif4	F3R1Fwhlif4	F2R4Fwhlif4	F3R1Fwhlif4_F2R4Fwhlif4	F3R1Fwhlif4_F2R4Fwhlif4
WL176	2015-06-04	Week7	Milford	Root	Root	Root metagenome	4	176	25	4	D	4	C	7	4	176	F4R1	176A	11	F3R4	176B	Fwhlif31	F4R1Fwhlif31	F3R4Fwhlif31	F4R1Fwhlif31_F3R4Fwhlif31	F4R1Fwhlif31_F3R4Fwhlif31
WL177	2015-06-04	Week7	Milford	Stem	Stem	Shoot metagenome	1	177	25	6	E	4	D	9	6	177	F2R2	177A	13	F1R5	177B	Fwhlif45	F2R2Fwhlif45	F1R5Fwhlif45	F2R2Fwhlif45_F1R5Fwhlif45	F2R2Fwhlif45_F1R5Fwhlif45
WL178	2015-06-04	Week7	Milford	Stem	Stem	Shoot metagenome	2	178	25	1	E	11	C	12	1	178	F1R1	178A	8	F4R2	178B	Fwhlif36	F1R1Fwhlif36	F4R2Fwhlif36	F1R1Fwhlif36_F4R2Fwhlif36	F1R1Fwhlif36_F4R2Fwhlif36
WL179	2015-06-04	Week7	Milford	Stem	Stem	Shoot metagenome	3	179	25	6	B	1	G	5	6	179	F2R2	179A	13	F1R5	179B	Fwhlif77	F2R2Fwhlif77	F1R5Fwhlif77	F2R2Fwhlif77_F1R5Fwhlif77	F2R2Fwhlif77_F1R5Fwhlif77
WL180	2015-06-04	Week7	Milford	Stem	Stem	Shoot metagenome	4	180	25	3	A	3	H	4	3	180	F3R1	180A	10	F2R4	180B	Fwhlif88	F3R1Fwhlif88	F2R4Fwhlif88	F3R1Fwhlif88_F2R4Fwhlif88	F3R1Fwhlif88_F2R4Fwhlif88
WL181	2015-06-12	Week8	Cumulus	Leaves	Shoot	Shoot metagenome	1	181	25	6	C	1	H	5	6	181	F2R2	181A	13	F1R5	181B	Fwhlif89	F2R2Fwhlif89	F1R5Fwhlif89	F2R2Fwhlif89_F1R5Fwhlif89	F2R2Fwhlif89_F1R5Fwhlif89
WL182	2015-06-12	Week8	Cumulus	Leaves	Shoot	Shoot metagenome	2	182	25	7	A	6	H	11	7	182	F3R2	182A	14	F2R5	182B	Fwhlif95	F3R2Fwhlif95	F2R5Fwhlif95	F3R2Fwhlif95_F2R5Fwhlif95	F3R2Fwhlif95_F2R5Fwhlif95
WL183	2015-06-12	Week8	Cumulus	Leaves	Shoot	Shoot metagenome	3	183	25	3	E	6	F	8	3	183	F3R1	183A	10	F2R4	183B	Fwhlif68	F3R1Fwhlif68	F2R4Fwhlif68	F3R1Fwhlif68_F2R4Fwhlif68	F3R1Fwhlif68_F2R4Fwhlif68
WL184	2015-06-12	Week8	Cumulus	Leaves	Shoot	Shoot metagenome	4	184	25	2	H	3	A	5	2	184	F2R1	184A	9	F1R4	184B	Fwhlif5	F2R1Fwhlif5	F1R4Fwhlif5	F2R1Fwhlif5_F1R4Fwhlif5	F2R1Fwhlif5_F1R4Fwhlif5
WL185	2015-06-12	Week8	Cumulus	Root	Root	Root metagenome	1	185	25	5	H	5	H	9	5	185	F1R2	185A	12	F4R4	185B	Fwhlif93	F1R2Fwhlif93	F4R4Fwhlif93	F1R2Fwhlif93_F4R4Fwhlif93	F1R2Fwhlif93_F4R4Fwhlif93
WL186	2015-06-12	Week8	Cumulus	Root	Root	Root metagenome	2	186	25	6	G	6	G	11	6	186	F2R2	186A	13	F1R5	186B	Fwhlif83	F2R2Fwhlif83	F1R5Fwhlif83	F2R2Fwhlif83_F1R5Fwhlif83	F2R2Fwhlif83_F1R5Fwhlif83
WL187	2015-06-12	Week8	Cumulus	Root	Root	Root metagenome	3	187	25	1	G	7	C	8	1	187	F1R1	187A	8	F4R2	187B	Fwhlif32	F1R1Fwhlif32	F4R2Fwhlif32	F1R1Fwhlif32_F4R2Fwhlif32	F1R1Fwhlif32_F4R2Fwhlif32
WL188	2015-06-12	Week8	Cumulus	Root	Root	Root metagenome	4	188	25	3	C	10	F	12	3	188	F3R1	188A	10	F2R4	188B	Fwhlif72	F3R1Fwhlif72	F2R4Fwhlif72	F3R1Fwhlif72_F2R4Fwhlif72	F3R1Fwhlif72_F2R4Fwhlif72
WL189	2015-06-12	Week8	Cumulus	Stem	Stem	Shoot metagenome	1	189	25	7	A	4	G	9	7	189	F3R2	189A	14	F2R5	189B	Fwhlif81	F3R2Fwhlif81	F2R5Fwhlif81	F3R2Fwhlif81_F2R5Fwhlif81	F3R2Fwhlif81_F2R5Fwhlif81
WL190	2015-06-12	Week8	Cumulus	Stem	Stem	Shoot metagenome	2	190	25	4	B	6	A	9	4	190	F4R1	190A	11	F3R4	190B	Fwhlif9	F4R1Fwhlif9	F3R4Fwhlif9	F4R1Fwhlif9_F3R4Fwhlif9	F4R1Fwhlif9_F3R4Fwhlif9
WL191	2015-06-12	Week8	Cumulus	Stem	Stem	Shoot metagenome	3	191	25	3	E	12	A	3	4	191	F4R1	191A	11	F3R4	191B	Fwhlif3	F4R1Fwhlif3	F3R4Fwhlif3	F4R1Fwhlif3_F3R4Fwhlif3	F4R1Fwhlif3_F3R4Fwhlif3
WL192	2015-06-12	Week8	Cumulus	Stem	Stem	Shoot metagenome	4	192	25	2	F	10	C	12	2	192	F2R1	192A	9	F1R4	192B	Fwhlif36	F2R1Fwhlif36	F1R4Fwhlif36	F2R1Fwhlif36_F1R4Fwhlif36	F2R1Fwhlif36_F1R4Fwhlif36
WL193	2015-06-12	Week8	Quench	Leaves	Shoot	Shoot metagenome	1	193	25	4	D	6	C	9	4	193	F4R1	193A	11	F3R4	193B	Fwhlif33	F4R1Fwhlif33	F3R4Fwhlif33	F4R1Fwhlif33_F3R4Fwhlif33	F4R1Fwhlif33_F3R4Fwhlif33
WL194	2015-06-12	Week8	Quench	Leaves	Shoot	Shoot metagenome	2	194	25	2	D	4	F	5	2	194	F2R1	194A	9	F1R4	194B	Fwhlif65	F2R1Fwhlif65	F1R4Fwhlif65	F2R1Fwhlif65_F1R4Fwhlif65	F2R1Fwhlif65_F1R4Fwhlif65
WL195	2015-06-12	Week8	Quench	Leaves	Shoot	Shoot metagenome	3	195	25	1	B	9	F	9	1	195	F1R1	195A	8	F4R2	195B	Fwhlif69	F1R1Fwhlif69	F4R2Fwhlif69	F1R1Fwhlif69_F4R2Fwhlif69	F1R1Fwhlif69_F4R2Fwhlif69
WL196	2015-06-12	Week8	Quench	Leaves	Shoot	Shoot metagenome	4	196	25	6	G	9	B	3	7	196	F3R2	196A	14	F2R5	196B	Fwhlif15	F3R2Fwhlif15	F2R5Fwhlif15	F3R2Fwhlif15_F2R5Fwhlif15	F3R2Fwhlif15_F2R5Fwhlif15
WL197	2015-06-12	Week8	Quench	Root	Root	Root metagenome	1	197	25	1	F	1	G	1	1	197	F1R1	197A	8	F4R2	197B	Fwhlif73	F1R1Fwhlif73	F4R2Fwhlif73	F1R1Fwhlif73_F4R2Fwhlif73	F1R1Fwhlif73_F4R2Fwhlif73
WL198	2015-06-12	Week8	Quench	Root	Root	Root metagenome	2	198	25	3	B	9	E	11	3	198	F3R1	198A	10	F2R4	198B	Fwhlif59	F3R1Fwhlif59	F2R4Fwhlif59	F3R1Fwhlif59_F2R4Fwhlif59	F3R1Fwhlif59_F2R4Fwhlif59
WL199	2015-06-12	Week8	Quench	Root	Root	Root metagenome	3	199	25	5	H	12	D	5	6	199	F2R2	199A	13	F1R5	199B	Fwhlif41	F2R2Fwhlif41	F1R5Fwhlif41	F2R2Fwhlif41_F1R5Fwhlif41	F2R2Fwhlif41_F1R5Fwhlif41
WL200	2015-06-12	Week8	Quench	Root	Root	Root metagenome	4	200	25	6	C	11	G	4	7	200	F3R2	200A	14	F2R5	200B	Fwhlif76	F3R2Fwhlif76	F2R5Fwhlif76	F3R2Fwhlif76_F2R5Fwhlif76	F3R2Fwhlif76_F2R5Fwhlif76
WL201	2015-06-12	Week8	Quench	Stem	Stem	Shoot metagenome	1	201	25	1	A	7	D	7	1	201	F1R1	201A	8	F4R2	201B	Fwhlif43	F1R1Fwhlif43	F4R2Fwhlif43	F1R1Fwhlif43_F4R2Fwhlif43	F1R1Fwhlif43_F4R2Fwhlif43
WL202	2015-06-12	Week8	Quench	Stem	Stem	Shoot metagenome	2	202	25	2	E	4	G	5	2	202	F2R1	202A	9	F1R4	202B	Fwhlif77	F2R1Fwhlif77	F1R4Fwhlif77	F2R1Fwhlif77_F1R4Fwhlif77	F2R1Fwhlif77_F1R4Fwhlif77
WL203	2015-06-12	Week8	Quench	Stem	Stem	Shoot metagenome	3	203	25	1	B	3	D	3	1	203	F1R1	203A	8	F4R2	203B	Fwhlif39	F1R1Fwhlif39	F4R2Fwhlif39	F1R1Fwhlif39_F4R2Fwhlif39	F1R1Fwhlif39_F4R2Fwhlif39
WL204	2015-06-12	Week8	Quench	Stem	Stem	Shoot metagenome	4	204	25	1	A	2	B	2	1	204	F1R1	204A	8	F4R2	204B	Fwhlif14	F1R1Fwhlif14	F4R2Fwhlif14	F1R1Fwhlif14_F4R2Fwhlif14	F1R1Fwhlif14_F4R2Fwhlif14
WL205	2015-06-12	Week8	Milford	Leaves	Shoot	Shoot metagenome	1	205	25	6	A	5	H	9	6	205	F2R2	205A	13	F1R5	205B	Fwhlif93	F2R2Fwhlif93	F1R5Fwhlif93	F2R2Fwhlif93_F1R5Fwhlif93	F2R2Fwhlif93_F1R5Fwhlif93
WL206	2015-06-12	Week8	Milford	Leaves	Shoot	Shoot metagenome	2	206	25	2	F	12	C	2	3	206	F3R1	206A	10	F2R4	206B	Fwhlif26	F3R1Fwhlif26	F2R4Fwhlif26	F3R1Fwhlif26_F2R4Fwhlif26	F3R1Fwhlif26_F2R4Fwhlif26
WL207	2015-06-12	Week8	Milford	Leaves	Shoot	Shoot metagenome	3	207	25	2	H	10	E	12	2	207	F2R1	207A	9	F1R4	207B	Fwhlif60	F2R1Fwhlif60	F1R4Fwhlif60	F2R1Fwhlif60_F1R4Fwhlif60	F2R1Fwhlif60_F1R4Fwhlif60
WL208	2015-06-12	Week8	Milford	Leaves	Shoot	Shoot metagenome	4	208	25	4	H	6	H	9	4	208	F4R1	208A	11	F3R4	208B	Fwhlif93	F4R1Fwhlif93	F3R4Fwhlif93	F4R1Fwhlif93_F3R4Fwhlif93	F4R1Fwhlif93_F3R4Fwhlif93
WL209	2015-06-12	Week8	Milford	Root	Root	Root metagenome	1	209	25	4	C	6	B	9	4	209	F4R1	209A	11	F3R4	209B	Fwhlif21	F4R1Fwhlif21	F3R4Fwhlif21	F4R1Fwhlif21_F3R4Fwhlif21	F4R1Fwhlif21_F3R4Fwhlif21
WL210	2015-06-12	Week8	Milford	Root	Root	Root metagenome	2	210	25	5	B	7	C	11	5	210	F1R2	210A	12	F4R4	210B	Fwhlif35	F1R2Fwhlif35	F4R4Fwhlif35	F1R2Fwhlif35_F4R4Fwhlif35	F1R2Fwhlif35_F4R4Fwhlif35
WL211	2015-06-12	Week8	Milford	Root	Root	Root metagenome	3	211	25	3	E	7	F	9	3	211	F3R1	211A	10	F2R4	211B	Fwhlif69	F3R1Fwhlif69	F2R4Fwhlif69	F3R1Fwhlif69_F2R4Fwhlif69	F3R1Fwhlif69_F2R4Fwhlif69
WL212	2015-06-12	Week8	Milford	Root	Root	Root metagenome	4	212	25	1	C	11	A	12	1	212	F1R1	212A	8	F4R2	212B	Fwhlif12	F1R1Fwhlif12	F4R2Fwhlif12	F1R1Fwhlif12_F4R2Fwhlif12	F1R1Fwhlif12_F4R2Fwhlif12
WL213	2015-06-12	Week8	Milford	Stem	Stem	Shoot metagenome	1	213	25	5	A	5	A	9	5	213	F1R2	213A	12	F4R4	213B	Fwhlif9	F1R2Fwhlif9	F4R4Fwhlif9	F1R2Fwhlif9_F4R4Fwhlif9	F1R2Fwhlif9_F4R4Fwhlif9
WL214	2015-06-12	Week8	Milford	Stem	Stem	Shoot metagenome	2	214	25	3	E	11	A	2	4	214	F4R1	214A	11	F3R4	214B	Fwhlif2	F4R1Fwhlif2	F3R4Fwhlif2	F4R1Fwhlif2_F3R4Fwhlif2	F4R1Fwhlif2_F3R4Fwhlif2
WL215	2015-06-12	Week8	Milford	Stem	Stem	Shoot metagenome	3	215	25	1	H	1	A	2	1	215	F1R1	215A	8	F4R2	215B	Fwhlif2	F1R1Fwhlif2	F4R2Fwhlif2	F1R1Fwhlif2_F4R2Fwhlif2	F1R1Fwhlif2_F4R2Fwhlif2
WL216	2015-06-12	Week8	Milford	Stem	Stem	Shoot metagenome	4	216	25	4	F	10	A	2	5	216	F1R2	216A	12	F4R4	216B	Fwhlif2	F1R2Fwhlif2	F4R4Fwhlif2	F1R2Fwhlif2_F4R4Fwhlif2	F1R2Fwhlif2_F4R4Fwhlif2
WL217	2015-06-18	Week9	Cumulus	Leaves	Shoot	Shoot metagenome	1	217	25	3	D	1	B	3	3	217	F3R1	217A	10	F2R4	217B	Fwhlif15	F3R1Fwhlif15	F2R4Fwhlif15	F3R1Fwhlif15_F2R4Fwhlif15	F3R1Fwhlif15_F2R4Fwhlif15
WL218	2015-06-18	Week9	Cumulus	Leaves	Shoot	Shoot metagenome	2	218	25	1	B	11	H	11	1	218	F1R1	218A	8	F4R2	218B	Fwhlif95	F1R1Fwhlif95	F4R2Fwhlif95	F1R1Fwhlif95_F4R2Fwhlif95	F1R1Fwhlif95_F4R2Fwhlif95
WL219	2015-06-18	Week9	Cumulus	Leaves	Shoot	Shoot metagenome	3	219	25	4	H	9	B	1	5	219	F1R2	219A	12	F4R4	219B	Fwhlif13	F1R2Fwhlif13	F4R4Fwhlif13	F1R2Fwhlif13_F4R4Fwhlif13	F1R2Fwhlif13_F4R4Fwhlif13
WL220	2015-06-18	Week9	Cumulus	Leaves	Shoot	Shoot metagenome	4	220	25	3	E	3	D	5	3	220	F3R1	220A	10	F2R4	220B	Fwhlif41	F3R1Fwhlif41	F2R4Fwhlif41	F3R1Fwhlif41_F2R4Fwhlif41	F3R1Fwhlif41_F2R4Fwhlif41
WL221	2015-06-18	Week9	Cumulus	Root	Root	Root metagenome	1	221	25	4	G	5	F	8	4	221	F4R1	221A	11	F3R4	221B	Fwhlif68	F4R1Fwhlif68	F3R4Fwhlif68	F4R1Fwhlif68_F3R4Fwhlif68	F4R1Fwhlif68_F3R4Fwhlif68
WL222	2015-06-18	Week9	Cumulus	Root	Root	Root metagenome	2	222	25	6	E	5	D	10	6	222	F2R2	222A	13	F1R5	222B	Fwhlif46	F2R2Fwhlif46	F1R5Fwhlif46	F2R2Fwhlif46_F1R5Fwhlif46	F2R2Fwhlif46_F1R5Fwhlif46
WL223	2015-06-18	Week9	Cumulus	Root	Root	Root metagenome	3	223	25	2	A	5	C	6	2	223	F2R1	223A	9	F1R4	223B	Fwhlif30	F2R1Fwhlif30	F1R4Fwhlif30	F2R1Fwhlif30_F1R4Fwhlif30	F2R1Fwhlif30_F1R4Fwhlif30
WL224	2015-06-18	Week9	Cumulus	Root	Root	Root metagenome	4	224	25	1	A	5	C	5	1	224	F1R1	224A	8	F4R2	224B	Fwhlif29	F1R1Fwhlif29	F4R2Fwhlif29	F1R1Fwhlif29_F4R2Fwhlif29	F1R1Fwhlif29_F4R2Fwhlif29
WL225	2015-06-18	Week9	Cumulus	Stem	Stem	Shoot metagenome	1	225	25	1	C	8	G	8	1	225	F1R1	225A	8	F4R2	225B	Fwhlif80	F1R1Fwhlif80	F4R2Fwhlif80	F1R1Fwhlif80_F4R2Fwhlif80	F1R1Fwhlif80_F4R2Fwhlif80
WL226	2015-06-18	Week9	Cumulus	Stem	Stem	Shoot metagenome	2	226	25	3	D	11	H	1	4	226	F4R1	226A	11	F3R4	226B	Fwhlif85	F4R1Fwhlif85	F3R4Fwhlif85	F4R1Fwhlif85_F3R4Fwhlif85	F4R1Fwhlif85_F3R4Fwhlif85
WL227	2015-06-18	Week9	Cumulus	Stem	Stem	Shoot metagenome	3	227	25	1	G	6	B	7	1	227	F1R1	227A	8	F4R2	227B	Fwhlif19	F1R1Fwhlif19	F4R2Fwhlif19	F1R1Fwhlif19_F4R2Fwhlif19	F1R1Fwhlif19_F4R2Fwhlif19
WL228	2015-06-18	Week9	Cumulus	Stem	Stem	Shoot metagenome	4	228	25	5	G	3	F	7	5	228	F1R2	228A	12	F4R4	228B	Fwhlif67	F1R2Fwhlif67	F4R4Fwhlif67	F1R2Fwhlif67_F4R4Fwhlif67	F1R2Fwhlif67_F4R4Fwhlif67
WL229	2015-06-18	Week9	Cumulus	Head	Head	Shoot metagenome	1	229	25	5	E	5	E	9	5	229	F1R2	229A	12	F4R4	229B	Fwhlif57	F1R2Fwhlif57	F4R4Fwhlif57	F1R2Fwhlif57_F4R4Fwhlif57	F1R2Fwhlif57_F4R4Fwhlif57
WL230	2015-06-18	Week9	Cumulus	Head	Head	Shoot metagenome	2	230	25	6	G	4	F	9	6	230	F2R2	230A	13	F1R5	230B	Fwhlif69	F2R2Fwhlif69	F1R5Fwhlif69	F2R2Fwhlif69_F1R5Fwhlif69	F2R2Fwhlif69_F1R5Fwhlif69
WL231	2015-06-18	Week9	Cumulus	Head	Head	Shoot metagenome	3	231	25	1	B	4	D	4	1	231	F1R1	231A	8	F4R2	231B	Fwhlif40	F1R1Fwhlif40	F4R2Fwhlif40	F1R1Fwhlif40_F4R2Fwhlif40	F1R1Fwhlif40_F4R2Fwhlif40
WL232	2015-06-18	Week9	Cumulus	Head	Head	Shoot metagenome	4	232	25	2	C	3	C	4	2	232	F2R1	232A	9	F1R4	232B	Fwhlif28	F2R1Fwhlif28	F1R4Fwhlif28	F2R1Fwhlif28_F1R4Fwhlif28	F2R1Fwhlif28_F1R4Fwhlif28
WL233	2015-06-18	Week9	Quench	Leaves	Shoot	Shoot metagenome	1	233	25	1	B	7	E	7	1	233	F1R1	233A	8	F4R2	233B	Fwhlif55	F1R1Fwhlif55	F4R2Fwhlif55	F1R1Fwhlif55_F4R2Fwhlif55	F1R1Fwhlif55_F4R2Fwhlif55
WL234	2015-06-18	Week9	Quench	Leaves	Shoot	Shoot metagenome	2	234	25	1	B	8	F	8	1	234	F1R1	234A	8	F4R2	234B	Fwhlif68	F1R1Fwhlif68	F4R2Fwhlif68	F1R1Fwhlif68_F4R2Fwhlif68	F1R1Fwhlif68_F4R2Fwhlif68
WL235	2015-06-18	Week9	Quench	Leaves	Shoot	Shoot metagenome	3	235	25	6	E	11	A	5	7	235	F3R2	235A	14	F2R5	235B	Fwhlif5	F3R2Fwhlif5	F2R5Fwhlif5	F3R2Fwhlif5_F2R5Fwhlif5	F3R2Fwhlif5_F2R5Fwhlif5
WL236	2015-06-18	Week9	Quench	Leaves	Shoot	Shoot metagenome	4	236	25	5	B	10	D	2	6	236	F2R2	236A	13	F1R5	236B	Fwhlif38	F2R2Fwhlif38	F1R5Fwhlif38	F2R2Fwhlif38_F1R5Fwhlif38	F2R2Fwhlif38_F1R5Fwhlif38
WL237	2015-06-18	Week9	Quench	Root	Root	Root metagenome	1	237	25	6	B	2	G	6	6	237	F2R2	237A	13	F1R5	237B	Fwhlif78	F2R2Fwhlif78	F1R5Fwhlif78	F2R2Fwhlif78_F1R5Fwhlif78	F2R2Fwhlif78_F1R5Fwhlif78
WL238	2015-06-18	Week9	Quench	Root	Root	Root metagenome	2	238	25	1	B	1	B	1	1	238	F1R1	238A	8	F4R2	238B	Fwhlif13	F1R1Fwhlif13	F4R2Fwhlif13	F1R1Fwhlif13_F4R2Fwhlif13	F1R1Fwhlif13_F4R2Fwhlif13
WL239	2015-06-18	Week9	Quench	Root	Root	Root metagenome	3	239	25	3	B	3	A	5	3	239	F3R1	239A	10	F2R4	239B	Fwhlif5	F3R1Fwhlif5	F2R4Fwhlif5	F3R1Fwhlif5_F2R4Fwhlif5	F3R1Fwhlif5_F2R4Fwhlif5
WL240	2015-06-18	Week9	Quench	Root	Root	Root metagenome	4	240	25	2	H	8	D	10	2	240	F2R1	240A	9	F1R4	240B	Fwhlif46	F2R1Fwhlif46	F1R4Fwhlif46	F2R1Fwhlif46_F1R4Fwhlif46	F2R1Fwhlif46_F1R4Fwhlif46
WL241	2015-06-18	Week9	Quench	Stem	Stem	Shoot metagenome	1	241	25	6	H	1	E	6	6	241	F2R2	241A	13	F1R5	241B	Fwhlif54	F2R2Fwhlif54	F1R5Fwhlif54	F2R2Fwhlif54_F1R5Fwhlif54	F2R2Fwhlif54_F1R5Fwhlif54
WL242	2015-06-18	Week9	Quench	Stem	Stem	Shoot metagenome	2	242	25	7	G	2	D	8	7	242	F3R2	242A	14	F2R5	242B	Fwhlif44	F3R2Fwhlif44	F2R5Fwhlif44	F3R2Fwhlif44_F2R5Fwhlif44	F3R2Fwhlif44_F2R5Fwhlif44
WL243	2015-06-18	Week9	Quench	Stem	Stem	Shoot metagenome	3	243	25	5	D	12	H	4	6	243	F2R2	243A	13	F1R5	243B	Fwhlif88	F2R2Fwhlif88	F1R5Fwhlif88	F2R2Fwhlif88_F1R5Fwhlif88	F2R2Fwhlif88_F1R5Fwhlif88
WL244	2015-06-18	Week9	Quench	Stem	Stem	Shoot metagenome	4	244	25	1	A	9	E	9	1	244	F1R1	244A	8	F4R2	244B	Fwhlif57	F1R1Fwhlif57	F4R2Fwhlif57	F1R1Fwhlif57_F4R2Fwhlif57	F1R1Fwhlif57_F4R2Fwhlif57
WL245	2015-06-18	Week9	Quench	Head	Head	Shoot metagenome	1	245	25	2	G	7	B	9	2	245	F2R1	245A	9	F1R4	245B	Fwhlif21	F2R1Fwhlif21	F1R4Fwhlif21	F2R1Fwhlif21_F1R4Fwhlif21	F2R1Fwhlif21_F1R4Fwhlif21
WL246	2015-06-18	Week9	Quench	Head	Head	Shoot metagenome	2	246	25	2	C	6	E	7	2	246	F2R1	246A	9	F1R4	246B	Fwhlif55	F2R1Fwhlif55	F1R4Fwhlif55	F2R1Fwhlif55_F1R4Fwhlif55	F2R1Fwhlif55_F1R4Fwhlif55
WL247	2015-06-18	Week9	Quench	Head	Head	Shoot metagenome	3	247	25	3	C	1	A	3	3	247	F3R1	247A	10	F2R4	247B	Fwhlif3	F3R1Fwhlif3	F2R4Fwhlif3	F3R1Fwhlif3_F2R4Fwhlif3	F3R1Fwhlif3_F2R4Fwhlif3
WL248	2015-06-18	Week9	Quench	Head	Head	Shoot metagenome	4	248	25	1	H	7	D	8	1	248	F1R1	248A	8	F4R2	248B	Fwhlif44	F1R1Fwhlif44	F4R2Fwhlif44	F1R1Fwhlif44_F4R2Fwhlif44	F1R1Fwhlif44_F4R2Fwhlif44
WL249	2015-06-18	Week9	Milford	Leaves	Shoot	Shoot metagenome	1	249	25	2	H	1	H	2	2	249	F2R1	249A	9	F1R4	249B	Fwhlif86	F2R1Fwhlif86	F1R4Fwhlif86	F2R1Fwhlif86_F1R4Fwhlif86	F2R1Fwhlif86_F1R4Fwhlif86
WL250	2015-06-18	Week9	Milford	Leaves	Shoot	Shoot metagenome	2	250	25	7	C	5	B	11	7	250	F3R2	250A	14	F2R5	250B	Fwhlif23	F3R2Fwhlif23	F2R5Fwhlif23	F3R2Fwhlif23_F2R5Fwhlif23	F3R2Fwhlif23_F2R5Fwhlif23
WL251	2015-06-18	Week9	Milford	Leaves	Shoot	Shoot metagenome	3	251	25	3	B	7	C	9	3	251	F3R1	251A	10	F2R4	251B	Fwhlif33	F3R1Fwhlif33	F2R4Fwhlif33	F3R1Fwhlif33_F2R4Fwhlif33	F3R1Fwhlif33_F2R4Fwhlif33
WL252	2015-06-18	Week9	Milford	Leaves	Shoot	Shoot metagenome	4	252	25	1	H	3	B	4	1	252	F1R1	252A	8	F4R2	252B	Fwhlif16	F1R1Fwhlif16	F4R2Fwhlif16	F1R1Fwhlif16_F4R2Fwhlif16	F1R1Fwhlif16_F4R2Fwhlif16
WL253	2015-06-18	Week9	Milford	Root	Root	Root metagenome	1	253	25	5	H	3	G	7	5	253	F1R2	253A	12	F4R4	253B	Fwhlif79	F1R2Fwhlif79	F4R4Fwhlif79	F1R2Fwhlif79_F4R4Fwhlif79	F1R2Fwhlif79_F4R4Fwhlif79
WL254	2015-06-18	Week9	Milford	Root	Root	Root metagenome	2	254	25	2	B	4	D	5	2	254	F2R1	254A	9	F1R4	254B	Fwhlif41	F2R1Fwhlif41	F1R4Fwhlif41	F2R1Fwhlif41_F1R4Fwhlif41	F2R1Fwhlif41_F1R4Fwhlif41
WL255	2015-06-18	Week9	Milford	Root	Root	Root metagenome	3	255	25	4	A	4	H	6	4	255	F4R1	255A	11	F3R4	255B	Fwhlif90	F4R1Fwhlif90	F3R4Fwhlif90	F4R1Fwhlif90_F3R4Fwhlif90	F4R1Fwhlif90_F3R4Fwhlif90
WL256	2015-06-18	Week9	Milford	Root	Root	Root metagenome	4	256	25	2	D	8	H	9	2	256	F2R1	256A	9	F1R4	256B	Fwhlif93	F2R1Fwhlif93	F1R4Fwhlif93	F2R1Fwhlif93_F1R4Fwhlif93	F2R1Fwhlif93_F1R4Fwhlif93
WL257	2015-06-18	Week9	Milford	Stem	Stem	Shoot metagenome	1	257	25	4	B	8	C	11	4	257	F4R1	257A	11	F3R4	257B	Fwhlif35	F4R1Fwhlif35	F3R4Fwhlif35	F4R1Fwhlif35_F3R4Fwhlif35	F4R1Fwhlif35_F3R4Fwhlif35
WL258	2015-06-18	Week9	Milford	Stem	Stem	Shoot metagenome	2	258	25	6	A	11	E	4	7	258	F3R2	258A	14	F2R5	258B	Fwhlif52	F3R2Fwhlif52	F2R5Fwhlif52	F3R2Fwhlif52_F2R5Fwhlif52	F3R2Fwhlif52_F2R5Fwhlif52
WL259	2015-06-18	Week9	Milford	Stem	Stem	Shoot metagenome	3	259	25	2	D	5	F	6	2	259	F2R1	259A	9	F1R4	259B	Fwhlif66	F2R1Fwhlif66	F1R4Fwhlif66	F2R1Fwhlif66_F1R4Fwhlif66	F2R1Fwhlif66_F1R4Fwhlif66
WL260	2015-06-18	Week9	Milford	Stem	Stem	Shoot metagenome	4	260	25	5	G	6	H	10	5	260	F1R2	260A	12	F4R4	260B	Fwhlif94	F1R2Fwhlif94	F4R4Fwhlif94	F1R2Fwhlif94_F4R4Fwhlif94	F1R2Fwhlif94_F4R4Fwhlif94
WL261	2015-06-18	Week9	Milford	Head	Head	Shoot metagenome	1	261	25	5	A	11	C	3	6	261	F2R2	261A	13	F1R5	261B	Fwhlif27	F2R2Fwhlif27	F1R5Fwhlif27	F2R2Fwhlif27_F1R5Fwhlif27	F2R2Fwhlif27_F1R5Fwhlif27
WL262	2015-06-18	Week9	Milford	Head	Head	Shoot metagenome	2	262	25	1	F	11	D	12	1	262	F1R1	262A	8	F4R2	262B	Fwhlif48	F1R1Fwhlif48	F4R2Fwhlif48	F1R1Fwhlif48_F4R2Fwhlif48	F1R1Fwhlif48_F4R2Fwhlif48
WL263	2015-06-18	Week9	Milford	Head	Head	Shoot metagenome	3	263	25	1	E	5	H	5	1	263	F1R1	263A	8	F4R2	263B	Fwhlif89	F1R1Fwhlif89	F4R2Fwhlif89	F1R1Fwhlif89_F4R2Fwhlif89	F1R1Fwhlif89_F4R2Fwhlif89
WL264	2015-06-18	Week9	Milford	Head	Head	Shoot metagenome	4	264	25	3	E	9	H	11	3	264	F3R1	264A	10	F2R4	264B	Fwhlif95	F3R1Fwhlif95	F2R4Fwhlif95	F3R1Fwhlif95_F2R4Fwhlif95	F3R1Fwhlif95_F2R4Fwhlif95
WL265	2015-06-25	Week10	Cumulus	Leaves	Shoot	Shoot metagenome	1	265	25	3	G	11	C	2	4	265	F4R1	265A	11	F3R4	265B	Fwhlif26	F4R1Fwhlif26	F3R4Fwhlif26	F4R1Fwhlif26_F3R4Fwhlif26	F4R1Fwhlif26_F3R4Fwhlif26
WL266	2015-06-25	Week10	Cumulus	Leaves	Shoot	Shoot metagenome	2	266	25	6	A	4	H	8	6	266	F2R2	266A	13	F1R5	266B	Fwhlif92	F2R2Fwhlif92	F1R5Fwhlif92	F2R2Fwhlif92_F1R5Fwhlif92	F2R2Fwhlif92_F1R5Fwhlif92
WL267	2015-06-25	Week10	Cumulus	Leaves	Shoot	Shoot metagenome	3	267	25	3	A	9	D	11	3	267	F3R1	267A	10	F2R4	267B	Fwhlif47	F3R1Fwhlif47	F2R4Fwhlif47	F3R1Fwhlif47_F2R4Fwhlif47	F3R1Fwhlif47_F2R4Fwhlif47
WL268	2015-06-25	Week10	Cumulus	Leaves	Shoot	Shoot metagenome	4	268	25	6	C	4	B	9	6	268	F2R2	268A	13	F1R5	268B	Fwhlif21	F2R2Fwhlif21	F1R5Fwhlif21	F2R2Fwhlif21_F1R5Fwhlif21	F2R2Fwhlif21_F1R5Fwhlif21
WL269	2015-06-25	Week10	Cumulus	Root	Root	Root metagenome	1	269	6	1	D	12	B	1	2	269	F2R1	269A	9	F1R4	269B	Fwhlif13	F2R1Fwhlif13	F1R4Fwhlif13	F2R1Fwhlif13_F1R4Fwhlif13	F2R1Fwhlif13_F1R4Fwhlif13
WL270	2015-06-25	Week10	Cumulus	Root	Root	Root metagenome	2	270	19	5	G	2	E	6	5	270	F1R2	270A	12	F4R4	270B	Fwhlif54	F1R2Fwhlif54	F4R4Fwhlif54	F1R2Fwhlif54_F4R4Fwhlif54	F1R2Fwhlif54_F4R4Fwhlif54
WL271	2015-06-25	Week10	Cumulus	Root	Root	Root metagenome	3	271	25	6	C	7	D	12	6	271	F2R2	271A	13	F1R5	271B	Fwhlif48	F2R2Fwhlif48	F1R5Fwhlif48	F2R2Fwhlif48_F1R5Fwhlif48	F2R2Fwhlif48_F1R5Fwhlif48
WL272	2015-06-25	Week10	Cumulus	Root	Root	Root metagenome	4	272	25	2	B	5	D	6	2	272	F2R1	272A	9	F1R4	272B	Fwhlif42	F2R1Fwhlif42	F1R4Fwhlif42	F2R1Fwhlif42_F1R4Fwhlif42	F2R1Fwhlif42_F1R4Fwhlif42
WL273	2015-06-25	Week10	Cumulus	Stem	Stem	Shoot metagenome	1	273	25	1	G	8	C	9	1	273	F1R1	273A	8	F4R2	273B	Fwhlif33	F1R1Fwhlif33	F4R2Fwhlif33	F1R1Fwhlif33_F4R2Fwhlif33	F1R1Fwhlif33_F4R2Fwhlif33
WL274	2015-06-25	Week10	Cumulus	Stem	Stem	Shoot metagenome	2	274	25	2	H	5	B	7	2	274	F2R1	274A	9	F1R4	274B	Fwhlif19	F2R1Fwhlif19	F1R4Fwhlif19	F2R1Fwhlif19_F1R4Fwhlif19	F2R1Fwhlif19_F1R4Fwhlif19
WL275	2015-06-25	Week10	Cumulus	Stem	Stem	Shoot metagenome	3	275	25	5	A	4	H	7	5	275	F1R2	275A	12	F4R4	275B	Fwhlif91	F1R2Fwhlif91	F4R4Fwhlif91	F1R2Fwhlif91_F4R4Fwhlif91	F1R2Fwhlif91_F4R4Fwhlif91
WL276	2015-06-25	Week10	Cumulus	Stem	Stem	Shoot metagenome	4	276	25	7	E	3	C	9	7	276	F3R2	276A	14	F2R5	276B	Fwhlif33	F3R2Fwhlif33	F2R5Fwhlif33	F3R2Fwhlif33_F2R5Fwhlif33	F3R2Fwhlif33_F2R5Fwhlif33
WL277	2015-06-25	Week10	Cumulus	Head	Head	Shoot metagenome	1	277	25	5	C	3	A	7	5	277	F1R2	277A	12	F4R4	277B	Fwhlif7	F1R2Fwhlif7	F4R4Fwhlif7	F1R2Fwhlif7_F4R4Fwhlif7	F1R2Fwhlif7_F4R4Fwhlif7
WL278	2015-06-25	Week10	Cumulus	Head	Head	Shoot metagenome	2	278	25	4	G	7	H	10	4	278	F4R1	278A	11	F3R4	278B	Fwhlif94	F4R1Fwhlif94	F3R4Fwhlif94	F4R1Fwhlif94_F3R4Fwhlif94	F4R1Fwhlif94_F3R4Fwhlif94
WL279	2015-06-25	Week10	Cumulus	Head	Head	Shoot metagenome	3	279	25	2	E	5	G	6	2	279	F2R1	279A	9	F1R4	279B	Fwhlif78	F2R1Fwhlif78	F1R4Fwhlif78	F2R1Fwhlif78_F1R4Fwhlif78	F2R1Fwhlif78_F1R4Fwhlif78
WL280	2015-06-25	Week10	Cumulus	Head	Head	Shoot metagenome	4	280	25	3	D	3	C	5	3	280	F3R1	280A	10	F2R4	280B	Fwhlif29	F3R1Fwhlif29	F2R4Fwhlif29	F3R1Fwhlif29_F2R4Fwhlif29	F3R1Fwhlif29_F2R4Fwhlif29
WL281	2015-06-25	Week10	Quench	Leaves	Shoot	Shoot metagenome	1	281	25	1	F	12	D	1	2	281	F2R1	281A	9	F1R4	281B	Fwhlif37	F2R1Fwhlif37	F1R4Fwhlif37	F2R1Fwhlif37_F1R4Fwhlif37	F2R1Fwhlif37_F1R4Fwhlif37
WL282	2015-06-25	Week10	Quench	Leaves	Shoot	Shoot metagenome	2	282	25	6	H	12	D	6	7	282	F3R2	282A	14	F2R5	282B	Fwhlif42	F3R2Fwhlif42	F2R5Fwhlif42	F3R2Fwhlif42_F2R5Fwhlif42	F3R2Fwhlif42_F2R5Fwhlif42
WL283	2015-06-25	Week10	Quench	Leaves	Shoot	Shoot metagenome	3	283	25	3	D	8	F	10	3	283	F3R1	283A	10	F2R4	283B	Fwhlif70	F3R1Fwhlif70	F2R4Fwhlif70	F3R1Fwhlif70_F2R4Fwhlif70	F3R1Fwhlif70_F2R4Fwhlif70
WL284	2015-06-25	Week10	Quench	Leaves	Shoot	Shoot metagenome	4	284	25	5	F	10	H	2	6	284	F2R2	284A	13	F1R5	284B	Fwhlif86	F2R2Fwhlif86	F1R5Fwhlif86	F2R2Fwhlif86_F1R5Fwhlif86	F2R2Fwhlif86_F1R5Fwhlif86
WL285	2015-06-25	Week10	Quench	Root	Root	Root metagenome	1	285	25	5	F	12	B	5	6	285	F2R2	285A	13	F1R5	285B	Fwhlif17	F2R2Fwhlif17	F1R5Fwhlif17	F2R2Fwhlif17_F1R5Fwhlif17	F2R2Fwhlif17_F1R5Fwhlif17
WL286	2015-06-25	Week10	Quench	Root	Root	Root metagenome	2	286	25	2	E	11	B	1	3	286	F3R1	286A	10	F2R4	286B	Fwhlif13	F3R1Fwhlif13	F2R4Fwhlif13	F3R1Fwhlif13_F2R4Fwhlif13	F3R1Fwhlif13_F2R4Fwhlif13
WL287	2015-06-25	Week10	Quench	Root	Root	Root metagenome	3	287	25	3	C	11	G	1	4	287	F4R1	287A	11	F3R4	287B	Fwhlif73	F4R1Fwhlif73	F3R4Fwhlif73	F4R1Fwhlif73_F3R4Fwhlif73	F4R1Fwhlif73_F3R4Fwhlif73
WL288	2015-06-25	Week10	Quench	Root	Root	Root metagenome	4	288	25	7	D	5	C	11	7	288	F3R2	288A	14	F2R5	288B	Fwhlif35	F3R2Fwhlif35	F2R5Fwhlif35	F3R2Fwhlif35_F2R5Fwhlif35	F3R2Fwhlif35_F2R5Fwhlif35
WL289	2015-06-25	Week10	Quench	Stem	Stem	Shoot metagenome	1	289	25	6	F	7	G	12	6	289	F2R2	289A	13	F1R5	289B	Fwhlif84	F2R2Fwhlif84	F1R5Fwhlif84	F2R2Fwhlif84_F1R5Fwhlif84	F2R2Fwhlif84_F1R5Fwhlif84
WL290	2015-06-25	Week10	Quench	Stem	Stem	Shoot metagenome	2	290	25	4	D	8	E	11	4	290	F4R1	290A	11	F3R4	290B	Fwhlif59	F4R1Fwhlif59	F3R4Fwhlif59	F4R1Fwhlif59_F3R4Fwhlif59	F4R1Fwhlif59_F3R4Fwhlif59
WL291	2015-06-25	Week10	Quench	Stem	Stem	Shoot metagenome	3	291	25	3	A	12	E	2	4	291	F4R1	291A	11	F3R4	291B	Fwhlif50	F4R1Fwhlif50	F3R4Fwhlif50	F4R1Fwhlif50_F3R4Fwhlif50	F4R1Fwhlif50_F3R4Fwhlif50
WL292	2015-06-25	Week10	Quench	Stem	Stem	Shoot metagenome	4	292	25	3	H	9	C	12	3	292	F3R1	292A	10	F2R4	292B	Fwhlif36	F3R1Fwhlif36	F2R4Fwhlif36	F3R1Fwhlif36_F2R4Fwhlif36	F3R1Fwhlif36_F2R4Fwhlif36
WL293	2015-06-25	Week10	Quench	Head	Head	Shoot metagenome	1	293	25	7	C	4	A	10	7	293	F3R2	293A	14	F2R5	293B	Fwhlif10	F3R2Fwhlif10	F2R5Fwhlif10	F3R2Fwhlif10_F2R5Fwhlif10	F3R2Fwhlif10_F2R5Fwhlif10
WL294	2015-06-25	Week10	Quench	Head	Head	Shoot metagenome	2	294	25	7	A	1	F	6	7	294	F3R2	294A	14	F2R5	294B	Fwhlif66	F3R2Fwhlif66	F2R5Fwhlif66	F3R2Fwhlif66_F2R5Fwhlif66	F3R2Fwhlif66_F2R5Fwhlif66
WL295	2015-06-25	Week10	Quench	Head	Head	Shoot metagenome	3	295	25	6	A	12	E	5	7	295	F3R2	295A	14	F2R5	295B	Fwhlif53	F3R2Fwhlif53	F2R5Fwhlif53	F3R2Fwhlif53_F2R5Fwhlif53	F3R2Fwhlif53_F2R5Fwhlif53
WL296	2015-06-25	Week10	Quench	Head	Head	Shoot metagenome	4	296	25	4	D	5	C	8	4	296	F4R1	296A	11	F3R4	296B	Fwhlif32	F4R1Fwhlif32	F3R4Fwhlif32	F4R1Fwhlif32_F3R4Fwhlif32	F4R1Fwhlif32_F3R4Fwhlif32
WL297	2015-06-25	Week10	Milford	Leaves	Shoot	Shoot metagenome	1	297	25	3	H	8	C	11	3	297	F3R1	297A	10	F2R4	297B	Fwhlif35	F3R1Fwhlif35	F2R4Fwhlif35	F3R1Fwhlif35_F2R4Fwhlif35	F3R1Fwhlif35_F2R4Fwhlif35
WL298	2015-06-25	Week10	Milford	Leaves	Shoot	Shoot metagenome	2	298	25	4	C	7	C	10	4	298	F4R1	298A	11	F3R4	298B	Fwhlif34	F4R1Fwhlif34	F3R4Fwhlif34	F4R1Fwhlif34_F3R4Fwhlif34	F4R1Fwhlif34_F3R4Fwhlif34
WL299	2015-06-25	Week10	Milford	Leaves	Shoot	Shoot metagenome	3	299	25	4	D	7	D	10	4	299	F4R1	299A	11	F3R4	299B	Fwhlif46	F4R1Fwhlif46	F3R4Fwhlif46	F4R1Fwhlif46_F3R4Fwhlif46	F4R1Fwhlif46_F3R4Fwhlif46
WL300	2015-06-25	Week10	Milford	Leaves	Shoot	Shoot metagenome	4	300	25	3	D	10	G	12	3	300	F3R1	300A	10	F2R4	300B	Fwhlif84	F3R1Fwhlif84	F2R4Fwhlif84	F3R1Fwhlif84_F2R4Fwhlif84	F3R1Fwhlif84_F2R4Fwhlif84
WL301	2015-06-25	Week10	Milford	Root	Root	Root metagenome	1	301	25	1	G	4	A	5	1	301	F1R1	301A	8	F4R2	301B	Fwhlif5	F1R1Fwhlif5	F4R2Fwhlif5	F1R1Fwhlif5_F4R2Fwhlif5	F1R1Fwhlif5_F4R2Fwhlif5
WL302	2015-06-25	Week10	Milford	Root	Root	Root metagenome	2	302	25	7	D	3	B	9	7	302	F3R2	302A	14	F2R5	302B	Fwhlif21	F3R2Fwhlif21	F2R5Fwhlif21	F3R2Fwhlif21_F2R5Fwhlif21	F3R2Fwhlif21_F2R5Fwhlif21
WL303	2015-06-25	Week10	Milford	Root	Root	Root metagenome	3	303	25	2	A	7	D	8	2	303	F2R1	303A	9	F1R4	303B	Fwhlif44	F2R1Fwhlif44	F1R4Fwhlif44	F2R1Fwhlif44_F1R4Fwhlif44	F2R1Fwhlif44_F1R4Fwhlif44
WL304	2015-06-25	Week10	Milford	Root	Root	Root metagenome	4	304	25	3	C	8	E	10	3	304	F3R1	304A	10	F2R4	304B	Fwhlif58	F3R1Fwhlif58	F2R4Fwhlif58	F3R1Fwhlif58_F2R4Fwhlif58	F3R1Fwhlif58_F2R4Fwhlif58
WL305	2015-06-25	Week10	Milford	Stem	Stem	Shoot metagenome	1	305	25	3	F	1	D	3	3	305	F3R1	305A	10	F2R4	305B	Fwhlif39	F3R1Fwhlif39	F2R4Fwhlif39	F3R1Fwhlif39_F2R4Fwhlif39	F3R1Fwhlif39_F2R4Fwhlif39
WL306	2015-06-25	Week10	Milford	Stem	Stem	Shoot metagenome	2	306	25	6	G	3	E	8	6	306	F2R2	306A	13	F1R5	306B	Fwhlif56	F2R2Fwhlif56	F1R5Fwhlif56	F2R2Fwhlif56_F1R5Fwhlif56	F2R2Fwhlif56_F1R5Fwhlif56
WL307	2015-06-25	Week10	Milford	Stem	Stem	Shoot metagenome	3	307	25	5	F	2	D	6	5	307	F1R2	307A	12	F4R4	307B	Fwhlif42	F1R2Fwhlif42	F4R4Fwhlif42	F1R2Fwhlif42_F4R4Fwhlif42	F1R2Fwhlif42_F4R4Fwhlif42
WL308	2015-06-25	Week10	Milford	Stem	Stem	Shoot metagenome	4	308	25	4	B	3	H	5	4	308	F4R1	308A	11	F3R4	308B	Fwhlif89	F4R1Fwhlif89	F3R4Fwhlif89	F4R1Fwhlif89_F3R4Fwhlif89	F4R1Fwhlif89_F3R4Fwhlif89
WL309	2015-06-25	Week10	Milford	Head	Head	Shoot metagenome	1	309	25	6	C	9	F	2	7	309	F3R2	309A	14	F2R5	309B	Fwhlif62	F3R2Fwhlif62	F2R5Fwhlif62	F3R2Fwhlif62_F2R5Fwhlif62	F3R2Fwhlif62_F2R5Fwhlif62
WL310	2015-06-25	Week10	Milford	Head	Head	Shoot metagenome	2	310	25	5	A	10	C	2	6	310	F2R2	310A	13	F1R5	310B	Fwhlif26	F2R2Fwhlif26	F1R5Fwhlif26	F2R2Fwhlif26_F1R5Fwhlif26	F2R2Fwhlif26_F1R5Fwhlif26
WL311	2015-06-25	Week10	Milford	Head	Head	Shoot metagenome	3	311	25	4	H	10	C	2	5	311	F1R2	311A	12	F4R4	311B	Fwhlif26	F1R2Fwhlif26	F4R4Fwhlif26	F1R2Fwhlif26_F4R4Fwhlif26	F1R2Fwhlif26_F4R4Fwhlif26
WL312	2015-06-25	Week10	Milford	Head	Head	Shoot metagenome	4	312	25	6	H	7	A	1	7	312	F3R2	312A	14	F2R5	312B	Fwhlif1	F3R2Fwhlif1	F2R5Fwhlif1	F3R2Fwhlif1_F2R5Fwhlif1	F3R2Fwhlif1_F2R5Fwhlif1
WL313	2015-07-02	Week11	Cumulus	Leaves	Shoot	Shoot metagenome	1	313	25	2	A	12	F	1	3	313	F3R1	313A	10	F2R4	313B	Fwhlif61	F3R1Fwhlif61	F2R4Fwhlif61	F3R1Fwhlif61_F2R4Fwhlif61	F3R1Fwhlif61_F2R4Fwhlif61
WL314	2015-07-02	Week11	Cumulus	Leaves	Shoot	Shoot metagenome	2	314	25	4	G	6	G	9	4	314	F4R1	314A	11	F3R4	314B	Fwhlif81	F4R1Fwhlif81	F3R4Fwhlif81	F4R1Fwhlif81_F3R4Fwhlif81	F4R1Fwhlif81_F3R4Fwhlif81
WL315	2015-07-02	Week11	Cumulus	Leaves	Shoot	Shoot metagenome	3	315	25	3	A	4	H	5	3	315	F3R1	315A	10	F2R4	315B	Fwhlif89	F3R1Fwhlif89	F2R4Fwhlif89	F3R1Fwhlif89_F2R4Fwhlif89	F3R1Fwhlif89_F2R4Fwhlif89
WL316	2015-07-02	Week11	Cumulus	Leaves	Shoot	Shoot metagenome	4	316	25	5	B	5	B	9	5	316	F1R2	316A	12	F4R4	316B	Fwhlif21	F1R2Fwhlif21	F4R4Fwhlif21	F1R2Fwhlif21_F4R4Fwhlif21	F1R2Fwhlif21_F4R4Fwhlif21
WL317	2015-07-02	Week11	Cumulus	Root	Root	Root metagenome	1	317	25	1	A	1	A	1	1	317	F1R1	317A	8	F4R2	317B	Fwhlif1	F1R1Fwhlif1	F4R2Fwhlif1	F1R1Fwhlif1_F4R2Fwhlif1	F1R1Fwhlif1_F4R2Fwhlif1
WL318	2015-07-02	Week11	Cumulus	Root	Root	Root metagenome	2	318	25	3	G	12	C	3	4	318	F4R1	318A	11	F3R4	318B	Fwhlif27	F4R1Fwhlif27	F3R4Fwhlif27	F4R1Fwhlif27_F3R4Fwhlif27	F4R1Fwhlif27_F3R4Fwhlif27
WL319	2015-07-02	Week11	Cumulus	Root	Root	Root metagenome	3	319	25	2	D	6	G	7	2	319	F2R1	319A	9	F1R4	319B	Fwhlif79	F2R1Fwhlif79	F1R4Fwhlif79	F2R1Fwhlif79_F1R4Fwhlif79	F2R1Fwhlif79_F1R4Fwhlif79
WL320	2015-07-02	Week11	Cumulus	Root	Root	Root metagenome	4	320	25	6	H	5	G	10	6	320	F2R2	320A	13	F1R5	320B	Fwhlif82	F2R2Fwhlif82	F1R5Fwhlif82	F2R2Fwhlif82_F1R5Fwhlif82	F2R2Fwhlif82_F1R5Fwhlif82
WL321	2015-07-02	Week11	Cumulus	Stem	Stem	Shoot metagenome	1	321	25	6	D	2	A	7	6	321	F2R2	321A	13	F1R5	321B	Fwhlif7	F2R2Fwhlif7	F1R5Fwhlif7	F2R2Fwhlif7_F1R5Fwhlif7	F2R2Fwhlif7_F1R5Fwhlif7
WL322	2015-07-02	Week11	Cumulus	Stem	Stem	Shoot metagenome	2	322	25	5	G	9	A	2	6	322	F2R2	322A	13	F1R5	322B	Fwhlif2	F2R2Fwhlif2	F1R5Fwhlif2	F2R2Fwhlif2_F1R5Fwhlif2	F2R2Fwhlif2_F1R5Fwhlif2
WL323	2015-07-02	Week11	Cumulus	Stem	Stem	Shoot metagenome	3	323	25	6	H	8	B	2	7	323	F3R2	323A	14	F2R5	323B	Fwhlif14	F3R2Fwhlif14	F2R5Fwhlif14	F3R2Fwhlif14_F2R5Fwhlif14	F3R2Fwhlif14_F2R5Fwhlif14
WL324	2015-07-02	Week11	Cumulus	Stem	Stem	Shoot metagenome	4	324	25	7	B	3	G	8	7	324	F3R2	324A	14	F2R5	324B	Fwhlif80	F3R2Fwhlif80	F2R5Fwhlif80	F3R2Fwhlif80_F2R5Fwhlif80	F3R2Fwhlif80_F2R5Fwhlif80
WL325	2015-07-02	Week11	Cumulus	Head	Head	Shoot metagenome	1	325	25	7	B	4	H	9	7	325	F3R2	325A	14	F2R5	325B	Fwhlif93	F3R2Fwhlif93	F2R5Fwhlif93	F3R2Fwhlif93_F2R5Fwhlif93	F3R2Fwhlif93_F2R5Fwhlif93
WL326	2015-07-02	Week11	Cumulus	Head	Head	Shoot metagenome	2	326	25	6	D	10	G	3	7	326	F3R2	326A	14	F2R5	326B	Fwhlif75	F3R2Fwhlif75	F2R5Fwhlif75	F3R2Fwhlif75_F2R5Fwhlif75	F3R2Fwhlif75_F2R5Fwhlif75
WL327	2015-07-02	Week11	Cumulus	Head	Head	Shoot metagenome	3	327	25	4	B	5	A	8	4	327	F4R1	327A	11	F3R4	327B	Fwhlif8	F4R1Fwhlif8	F3R4Fwhlif8	F4R1Fwhlif8_F3R4Fwhlif8	F4R1Fwhlif8_F3R4Fwhlif8
WL328	2015-07-02	Week11	Cumulus	Head	Head	Shoot metagenome	4	328	25	4	H	2	F	5	4	328	F4R1	328A	11	F3R4	328B	Fwhlif65	F4R1Fwhlif65	F3R4Fwhlif65	F4R1Fwhlif65_F3R4Fwhlif65	F4R1Fwhlif65_F3R4Fwhlif65
WL329	2015-07-02	Week11	Quench	Leaves	Shoot	Shoot metagenome	1	329	25	6	A	9	D	2	7	329	F3R2	329A	14	F2R5	329B	Fwhlif38	F3R2Fwhlif38	F2R5Fwhlif38	F3R2Fwhlif38_F2R5Fwhlif38	F3R2Fwhlif38_F2R5Fwhlif38
WL330	2015-07-02	Week11	Quench	Leaves	Shoot	Shoot metagenome	2	330	25	3	G	7	H	9	3	330	F3R1	330A	10	F2R4	330B	Fwhlif93	F3R1Fwhlif93	F2R4Fwhlif93	F3R1Fwhlif93_F2R4Fwhlif93	F3R1Fwhlif93_F2R4Fwhlif93
WL331	2015-07-02	Week11	Quench	Leaves	Shoot	Shoot metagenome	3	331	25	7	F	6	F	12	7	331	F3R2	331A	14	F2R5	331B	Fwhlif72	F3R2Fwhlif72	F2R5Fwhlif72	F3R2Fwhlif72_F2R5Fwhlif72	F3R2Fwhlif72_F2R5Fwhlif72
WL332	2015-07-02	Week11	Quench	Leaves	Shoot	Shoot metagenome	4	332	25	1	C	3	E	3	1	332	F1R1	332A	8	F4R2	332B	Fwhlif51	F1R1Fwhlif51	F4R2Fwhlif51	F1R1Fwhlif51_F4R2Fwhlif51	F1R1Fwhlif51_F4R2Fwhlif51
WL333	2015-07-02	Week11	Quench	Root	Root	Root metagenome	1	333	25	5	H	1	E	5	5	333	F1R2	333A	12	F4R4	333B	Fwhlif53	F1R2Fwhlif53	F4R4Fwhlif53	F1R2Fwhlif53_F4R4Fwhlif53	F1R2Fwhlif53_F4R4Fwhlif53
WL334	2015-07-02	Week11	Quench	Root	Root	Root metagenome	2	334	25	4	C	3	A	6	4	334	F4R1	334A	11	F3R4	334B	Fwhlif6	F4R1Fwhlif6	F3R4Fwhlif6	F4R1Fwhlif6_F3R4Fwhlif6	F4R1Fwhlif6_F3R4Fwhlif6
WL335	2015-07-02	Week11	Quench	Root	Root	Root metagenome	3	335	25	1	F	9	C	10	1	335	F1R1	335A	8	F4R2	335B	Fwhlif34	F1R1Fwhlif34	F4R2Fwhlif34	F1R1Fwhlif34_F4R2Fwhlif34	F1R1Fwhlif34_F4R2Fwhlif34
WL336	2015-07-02	Week11	Quench	Root	Root	Root metagenome	4	336	25	7	H	6	H	12	7	336	F3R2	336A	14	F2R5	336B	Fwhlif96	F3R2Fwhlif96	F2R5Fwhlif96	F3R2Fwhlif96_F2R5Fwhlif96	F3R2Fwhlif96_F2R5Fwhlif96
WL337	2015-07-02	Week11	Quench	Stem	Stem	Shoot metagenome	1	337	25	7	E	6	E	12	7	337	F3R2	337A	14	F2R5	337B	Fwhlif60	F3R2Fwhlif60	F2R5Fwhlif60	F3R2Fwhlif60_F2R5Fwhlif60	F3R2Fwhlif60_F2R5Fwhlif60
WL338	2015-07-02	Week11	Quench	Stem	Stem	Shoot metagenome	2	338	25	5	F	4	E	8	5	338	F1R2	338A	12	F4R4	338B	Fwhlif56	F1R2Fwhlif56	F4R4Fwhlif56	F1R2Fwhlif56_F4R4Fwhlif56	F1R2Fwhlif56_F4R4Fwhlif56
WL339	2015-07-02	Week11	Quench	Stem	Stem	Shoot metagenome	3	339	25	2	B	11	G	12	2	339	F2R1	339A	9	F1R4	339B	Fwhlif84	F2R1Fwhlif84	F1R4Fwhlif84	F2R1Fwhlif84_F1R4Fwhlif84	F2R1Fwhlif84_F1R4Fwhlif84
WL340	2015-07-02	Week11	Quench	Stem	Stem	Shoot metagenome	4	340	25	6	B	5	A	10	6	340	F2R2	340A	13	F1R5	340B	Fwhlif10	F2R2Fwhlif10	F1R5Fwhlif10	F2R2Fwhlif10_F1R5Fwhlif10	F2R2Fwhlif10_F1R5Fwhlif10
WL341	2015-07-02	Week11	Quench	Head	Head	Shoot metagenome	1	341	25	7	C	2	H	7	7	341	F3R2	341A	14	F2R5	341B	Fwhlif91	F3R2Fwhlif91	F2R5Fwhlif91	F3R2Fwhlif91_F2R5Fwhlif91	F3R2Fwhlif91_F2R5Fwhlif91
WL342	2015-07-02	Week11	Quench	Head	Head	Shoot metagenome	2	342	25	2	G	12	D	2	3	342	F3R1	342A	10	F2R4	342B	Fwhlif38	F3R1Fwhlif38	F2R4Fwhlif38	F3R1Fwhlif38_F2R4Fwhlif38	F3R1Fwhlif38_F2R4Fwhlif38
WL343	2015-07-02	Week11	Quench	Head	Head	Shoot metagenome	3	343	25	6	B	10	E	3	7	343	F3R2	343A	14	F2R5	343B	Fwhlif51	F3R2Fwhlif51	F2R5Fwhlif51	F3R2Fwhlif51_F2R5Fwhlif51	F3R2Fwhlif51_F2R5Fwhlif51
WL344	2015-07-02	Week11	Quench	Head	Head	Shoot metagenome	4	344	25	7	B	5	A	11	7	344	F3R2	344A	14	F2R5	344B	Fwhlif11	F3R2Fwhlif11	F2R5Fwhlif11	F3R2Fwhlif11_F2R5Fwhlif11	F3R2Fwhlif11_F2R5Fwhlif11
WL345	2015-07-02	Week11	Milford	Leaves	Shoot	Shoot metagenome	1	345	25	2	H	7	C	9	2	345	F2R1	345A	9	F1R4	345B	Fwhlif33	F2R1Fwhlif33	F1R4Fwhlif33	F2R1Fwhlif33_F1R4Fwhlif33	F2R1Fwhlif33_F1R4Fwhlif33
WL346	2015-07-02	Week11	Milford	Leaves	Shoot	Shoot metagenome	2	346	25	7	G	3	E	9	7	346	F3R2	346A	14	F2R5	346B	Fwhlif57	F3R2Fwhlif57	F2R5Fwhlif57	F3R2Fwhlif57_F2R5Fwhlif57	F3R2Fwhlif57_F2R5Fwhlif57
WL347	2015-07-02	Week11	Milford	Leaves	Shoot	Shoot metagenome	3	347	25	5	A	6	B	10	5	347	F1R2	347A	12	F4R4	347B	Fwhlif22	F1R2Fwhlif22	F4R4Fwhlif22	F1R2Fwhlif22_F4R4Fwhlif22	F1R2Fwhlif22_F4R4Fwhlif22
WL348	2015-07-02	Week11	Milford	Leaves	Shoot	Shoot metagenome	4	348	25	1	G	3	A	4	1	348	F1R1	348A	8	F4R2	348B	Fwhlif4	F1R1Fwhlif4	F4R2Fwhlif4	F1R1Fwhlif4_F4R2Fwhlif4	F1R1Fwhlif4_F4R2Fwhlif4
WL349	2015-07-02	Week11	Milford	Root	Root	Root metagenome	1	349	25	4	E	7	E	10	4	349	F4R1	349A	11	F3R4	349B	Fwhlif58	F4R1Fwhlif58	F3R4Fwhlif58	F4R1Fwhlif58_F3R4Fwhlif58	F4R1Fwhlif58_F3R4Fwhlif58
WL350	2015-07-02	Week11	Milford	Root	Root	Root metagenome	2	350	25	3	F	10	B	1	4	350	F4R1	350A	11	F3R4	350B	Fwhlif13	F4R1Fwhlif13	F3R4Fwhlif13	F4R1Fwhlif13_F3R4Fwhlif13	F4R1Fwhlif13_F3R4Fwhlif13
WL351	2015-07-02	Week11	Milford	Root	Root	Root metagenome	3	351	25	1	F	7	B	8	1	351	F1R1	351A	8	F4R2	351B	Fwhlif20	F1R1Fwhlif20	F4R2Fwhlif20	F1R1Fwhlif20_F4R2Fwhlif20	F1R1Fwhlif20_F4R2Fwhlif20
WL352	2015-07-02	Week11	Milford	Root	Root	Root metagenome	4	352	25	5	H	2	F	6	5	352	F1R2	352A	12	F4R4	352B	Fwhlif66	F1R2Fwhlif66	F4R4Fwhlif66	F1R2Fwhlif66_F4R4Fwhlif66	F1R2Fwhlif66_F4R4Fwhlif66
WL353	2015-07-02	Week11	Milford	Stem	Stem	Shoot metagenome	1	353	25	5	A	12	E	4	6	353	F2R2	353A	13	F1R5	353B	Fwhlif52	F2R2Fwhlif52	F1R5Fwhlif52	F2R2Fwhlif52_F1R5Fwhlif52	F2R2Fwhlif52_F1R5Fwhlif52
WL354	2015-07-02	Week11	Milford	Stem	Stem	Shoot metagenome	2	354	25	3	E	4	E	6	3	354	F3R1	354A	10	F2R4	354B	Fwhlif54	F3R1Fwhlif54	F2R4Fwhlif54	F3R1Fwhlif54_F2R4Fwhlif54	F3R1Fwhlif54_F2R4Fwhlif54
WL355	2015-07-02	Week11	Milford	Stem	Stem	Shoot metagenome	3	355	25	3	B	4	A	6	3	355	F3R1	355A	10	F2R4	355B	Fwhlif6	F3R1Fwhlif6	F2R4Fwhlif6	F3R1Fwhlif6_F2R4Fwhlif6	F3R1Fwhlif6_F2R4Fwhlif6
WL356	2015-07-02	Week11	Milford	Stem	Stem	Shoot metagenome	4	356	25	2	D	1	D	2	2	356	F2R1	356A	9	F1R4	356B	Fwhlif38	F2R1Fwhlif38	F1R4Fwhlif38	F2R1Fwhlif38_F1R4Fwhlif38	F2R1Fwhlif38_F1R4Fwhlif38
WL357	2015-07-02	Week11	Milford	Head	Head	Shoot metagenome	1	357	25	7	F	5	E	11	7	357	F3R2	357A	14	F2R5	357B	Fwhlif59	F3R2Fwhlif59	F2R5Fwhlif59	F3R2Fwhlif59_F2R5Fwhlif59	F3R2Fwhlif59_F2R5Fwhlif59
WL358	2015-07-02	Week11	Milford	Head	Head	Shoot metagenome	2	358	25	2	D	11	A	1	3	358	F3R1	358A	10	F2R4	358B	Fwhlif1	F3R1Fwhlif1	F2R4Fwhlif1	F3R1Fwhlif1_F2R4Fwhlif1	F3R1Fwhlif1_F2R4Fwhlif1
WL359	2015-07-02	Week11	Milford	Head	Head	Shoot metagenome	3	359	25	4	C	9	D	12	4	359	F4R1	359A	11	F3R4	359B	Fwhlif48	F4R1Fwhlif48	F3R4Fwhlif48	F4R1Fwhlif48_F3R4Fwhlif48	F4R1Fwhlif48_F3R4Fwhlif48
WL360	2015-07-02	Week11	Milford	Head	Head	Shoot metagenome	4	360	25	4	F	6	F	9	4	360	F4R1	360A	11	F3R4	360B	Fwhlif69	F4R1Fwhlif69	F3R4Fwhlif69	F4R1Fwhlif69_F3R4Fwhlif69	F4R1Fwhlif69_F3R4Fwhlif69
WL361	2015-07-09	Week12	Cumulus	Leaves	Shoot	Shoot metagenome	1	361	25	4	F	7	F	10	4	361	F4R1	361A	11	F3R4	361B	Fwhlif70	F4R1Fwhlif70	F3R4Fwhlif70	F4R1Fwhlif70_F3R4Fwhlif70	F4R1Fwhlif70_F3R4Fwhlif70
WL362	2015-07-09	Week12	Cumulus	Leaves	Shoot	Shoot metagenome	2	362	25	4	A	1	E	3	4	362	F4R1	362A	11	F3R4	362B	Fwhlif51	F4R1Fwhlif51	F3R4Fwhlif51	F4R1Fwhlif51_F3R4Fwhlif51	F4R1Fwhlif51_F3R4Fwhlif51
WL363	2015-07-09	Week12	Cumulus	Leaves	Shoot	Shoot metagenome	3	363	25	4	F	2	D	5	4	363	F4R1	363A	11	F3R4	363B	Fwhlif41	F4R1Fwhlif41	F3R4Fwhlif41	F4R1Fwhlif41_F3R4Fwhlif41	F4R1Fwhlif41_F3R4Fwhlif41
WL364	2015-07-09	Week12	Cumulus	Leaves	Shoot	Shoot metagenome	4	364	25	7	H	2	E	8	7	364	F3R2	364A	14	F2R5	364B	Fwhlif56	F3R2Fwhlif56	F2R5Fwhlif56	F3R2Fwhlif56_F2R5Fwhlif56	F3R2Fwhlif56_F2R5Fwhlif56
WL365	2015-07-09	Week12	Cumulus	Root	Root	Root metagenome	1	365	25	3	G	1	E	3	3	365	F3R1	365A	10	F2R4	365B	Fwhlif51	F3R1Fwhlif51	F2R4Fwhlif51	F3R1Fwhlif51_F2R4Fwhlif51	F3R1Fwhlif51_F2R4Fwhlif51
WL366	2015-07-09	Week12	Cumulus	Root	Root	Root metagenome	2	366	25	4	E	3	C	6	4	366	F4R1	366A	11	F3R4	366B	Fwhlif30	F4R1Fwhlif30	F3R4Fwhlif30	F4R1Fwhlif30_F3R4Fwhlif30	F4R1Fwhlif30_F3R4Fwhlif30
WL367	2015-07-09	Week12	Cumulus	Root	Root	Root metagenome	3	367	25	1	D	11	B	12	1	367	F1R1	367A	8	F4R2	367B	Fwhlif24	F1R1Fwhlif24	F4R2Fwhlif24	F1R1Fwhlif24_F4R2Fwhlif24	F1R1Fwhlif24_F4R2Fwhlif24
WL368	2015-07-09	Week12	Cumulus	Root	Root	Root metagenome	4	368	25	1	E	12	C	1	2	368	F2R1	368A	9	F1R4	368B	Fwhlif25	F2R1Fwhlif25	F1R4Fwhlif25	F2R1Fwhlif25_F1R4Fwhlif25	F2R1Fwhlif25_F1R4Fwhlif25
WL369	2015-07-09	Week12	Cumulus	Stem	Stem	Shoot metagenome	1	369	25	3	C	7	D	9	3	369	F3R1	369A	10	F2R4	369B	Fwhlif45	F3R1Fwhlif45	F2R4Fwhlif45	F3R1Fwhlif45_F2R4Fwhlif45	F3R1Fwhlif45_F2R4Fwhlif45
WL370	2015-07-09	Week12	Cumulus	Stem	Stem	Shoot metagenome	2	370	25	1	C	7	F	7	1	370	F1R1	370A	8	F4R2	370B	Fwhlif67	F1R1Fwhlif67	F4R2Fwhlif67	F1R1Fwhlif67_F4R2Fwhlif67	F1R1Fwhlif67_F4R2Fwhlif67
WL371	2015-07-09	Week12	Cumulus	Stem	Stem	Shoot metagenome	3	371	25	2	F	2	F	3	2	371	F2R1	371A	9	F1R4	371B	Fwhlif63	F2R1Fwhlif63	F1R4Fwhlif63	F2R1Fwhlif63_F1R4Fwhlif63	F2R1Fwhlif63_F1R4Fwhlif63
WL372	2015-07-09	Week12	Cumulus	Stem	Stem	Shoot metagenome	4	372	25	2	A	6	C	7	2	372	F2R1	372A	9	F1R4	372B	Fwhlif31	F2R1Fwhlif31	F1R4Fwhlif31	F2R1Fwhlif31_F1R4Fwhlif31	F2R1Fwhlif31_F1R4Fwhlif31
WL373	2015-07-09	Week12	Cumulus	Head	Head	Shoot metagenome	1	373	25	5	A	1	F	4	5	373	F1R2	373A	12	F4R4	373B	Fwhlif64	F1R2Fwhlif64	F4R4Fwhlif64	F1R2Fwhlif64_F4R4Fwhlif64	F1R2Fwhlif64_F4R4Fwhlif64
WL374	2015-07-09	Week12	Cumulus	Head	Head	Shoot metagenome	2	374	25	2	C	2	C	3	2	374	F2R1	374A	9	F1R4	374B	Fwhlif27	F2R1Fwhlif27	F1R4Fwhlif27	F2R1Fwhlif27_F1R4Fwhlif27	F2R1Fwhlif27_F1R4Fwhlif27
WL375	2015-07-09	Week12	Cumulus	Head	Head	Shoot metagenome	3	375	25	6	E	2	B	7	6	375	F2R2	375A	13	F1R5	375B	Fwhlif19	F2R2Fwhlif19	F1R5Fwhlif19	F2R2Fwhlif19_F1R5Fwhlif19	F2R2Fwhlif19_F1R5Fwhlif19
WL376	2015-07-09	Week12	Cumulus	Head	Head	Shoot metagenome	4	376	25	1	F	3	H	3	1	376	F1R1	376A	8	F4R2	376B	Fwhlif87	F1R1Fwhlif87	F4R2Fwhlif87	F1R1Fwhlif87_F4R2Fwhlif87	F1R1Fwhlif87_F4R2Fwhlif87
WL377	2015-07-09	Week12	Quench	Leaves	Shoot	Shoot metagenome	1	377	25	1	F	2	G	2	1	377	F1R1	377A	8	F4R2	377B	Fwhlif74	F1R1Fwhlif74	F4R2Fwhlif74	F1R1Fwhlif74_F4R2Fwhlif74	F1R1Fwhlif74_F4R2Fwhlif74
WL378	2015-07-09	Week12	Quench	Leaves	Shoot	Shoot metagenome	2	378	25	2	D	2	D	3	2	378	F2R1	378A	9	F1R4	378B	Fwhlif39	F2R1Fwhlif39	F1R4Fwhlif39	F2R1Fwhlif39_F1R4Fwhlif39	F2R1Fwhlif39_F1R4Fwhlif39
WL379	2015-07-09	Week12	Quench	Leaves	Shoot	Shoot metagenome	3	379	25	2	G	3	G	4	2	379	F2R1	379A	9	F1R4	379B	Fwhlif76	F2R1Fwhlif76	F1R4Fwhlif76	F2R1Fwhlif76_F1R4Fwhlif76	F2R1Fwhlif76_F1R4Fwhlif76
WL380	2015-07-09	Week12	Quench	Leaves	Shoot	Shoot metagenome	4	380	25	2	H	11	E	1	3	380	F3R1	380A	10	F2R4	380B	Fwhlif49	F3R1Fwhlif49	F2R4Fwhlif49	F3R1Fwhlif49_F2R4Fwhlif49	F3R1Fwhlif49_F2R4Fwhlif49
WL381	2015-07-09	Week12	Quench	Root	Root	Root metagenome	1	381	25	6	C	12	G	5	7	381	F3R2	381A	14	F2R5	381B	Fwhlif77	F3R2Fwhlif77	F2R5Fwhlif77	F3R2Fwhlif77_F2R5Fwhlif77	F3R2Fwhlif77_F2R5Fwhlif77
WL382	2015-07-09	Week12	Quench	Root	Root	Root metagenome	2	382	25	3	C	6	D	8	3	382	F3R1	382A	10	F2R4	382B	Fwhlif44	F3R1Fwhlif44	F2R4Fwhlif44	F3R1Fwhlif44_F2R4Fwhlif44	F3R1Fwhlif44_F2R4Fwhlif44
WL383	2015-07-09	Week12	Quench	Root	Root	Root metagenome	3	383	14.1	2	E	10	B	12	2	383	F2R1	383A	9	F1R4	383B	Fwhlif24	F2R1Fwhlif24	F1R4Fwhlif24	F2R1Fwhlif24_F1R4Fwhlif24	F2R1Fwhlif24_F1R4Fwhlif24
WL384	2015-07-09	Week12	Quench	Root	Root	Root metagenome	4	384	25	2	A	10	E	11	2	384	F2R1	384A	9	F1R4	384B	Fwhlif59	F2R1Fwhlif59	F1R4Fwhlif59	F2R1Fwhlif59_F1R4Fwhlif59	F2R1Fwhlif59_F1R4Fwhlif59
WL385	2015-07-09	Week12	Quench	Stem	Stem	Shoot metagenome	1	385	25	1	F	5	A	6	1	385	F1R1	385A	8	F4R2	385B	Fwhlif6	F1R1Fwhlif6	F4R2Fwhlif6	F1R1Fwhlif6_F4R2Fwhlif6	F1R1Fwhlif6_F4R2Fwhlif6
WL386	2015-07-09	Week12	Quench	Stem	Stem	Shoot metagenome	2	386	25	2	F	11	C	1	3	386	F3R1	386A	10	F2R4	386B	Fwhlif25	F3R1Fwhlif25	F2R4Fwhlif25	F3R1Fwhlif25_F2R4Fwhlif25	F3R1Fwhlif25_F2R4Fwhlif25
WL387	2015-07-09	Week12	Quench	Stem	Stem	Shoot metagenome	3	387	25	5	B	1	G	4	5	387	F1R2	387A	12	F4R4	387B	Fwhlif76	F1R2Fwhlif76	F4R4Fwhlif76	F1R2Fwhlif76_F4R4Fwhlif76	F1R2Fwhlif76_F4R4Fwhlif76
WL388	2015-07-09	Week12	Quench	Stem	Stem	Shoot metagenome	4	388	25	2	C	9	G	10	2	388	F2R1	388A	9	F1R4	388B	Fwhlif82	F2R1Fwhlif82	F1R4Fwhlif82	F2R1Fwhlif82_F1R4Fwhlif82	F2R1Fwhlif82_F1R4Fwhlif82
WL389	2015-07-09	Week12	Quench	Head	Head	Shoot metagenome	1	389	25	3	B	8	D	10	3	389	F3R1	389A	10	F2R4	389B	Fwhlif46	F3R1Fwhlif46	F2R4Fwhlif46	F3R1Fwhlif46_F2R4Fwhlif46	F3R1Fwhlif46_F2R4Fwhlif46
WL390	2015-07-09	Week12	Quench	Head	Head	Shoot metagenome	2	390	25	3	B	5	B	7	3	390	F3R1	390A	10	F2R4	390B	Fwhlif19	F3R1Fwhlif19	F2R4Fwhlif19	F3R1Fwhlif19_F2R4Fwhlif19	F3R1Fwhlif19_F2R4Fwhlif19
WL391	2015-07-09	Week12	Quench	Head	Head	Shoot metagenome	3	391	25	1	D	8	H	8	1	391	F1R1	391A	8	F4R2	391B	Fwhlif92	F1R1Fwhlif92	F4R2Fwhlif92	F1R1Fwhlif92_F4R2Fwhlif92	F1R1Fwhlif92_F4R2Fwhlif92
WL392	2015-07-09	Week12	Quench	Head	Head	Shoot metagenome	4	392	25	3	B	11	F	1	4	392	F4R1	392A	11	F3R4	392B	Fwhlif61	F4R1Fwhlif61	F3R4Fwhlif61	F4R1Fwhlif61_F3R4Fwhlif61	F4R1Fwhlif61_F3R4Fwhlif61
WL393	2015-07-09	Week12	Milford	Leaves	Shoot	Shoot metagenome	1	393	25	4	G	12	C	4	5	393	F1R2	393A	12	F4R4	393B	Fwhlif28	F1R2Fwhlif28	F4R4Fwhlif28	F1R2Fwhlif28_F4R4Fwhlif28	F1R2Fwhlif28_F4R4Fwhlif28
WL394	2015-07-09	Week12	Milford	Leaves	Shoot	Shoot metagenome	2	394	25	5	G	4	F	8	5	394	F1R2	394A	12	F4R4	394B	Fwhlif68	F1R2Fwhlif68	F4R4Fwhlif68	F1R2Fwhlif68_F4R4Fwhlif68	F1R2Fwhlif68_F4R4Fwhlif68
WL395	2015-07-09	Week12	Milford	Leaves	Shoot	Shoot metagenome	3	395	25	2	H	9	D	11	2	395	F2R1	395A	9	F1R4	395B	Fwhlif47	F2R1Fwhlif47	F1R4Fwhlif47	F2R1Fwhlif47_F1R4Fwhlif47	F2R1Fwhlif47_F1R4Fwhlif47
WL396	2015-07-09	Week12	Milford	Leaves	Shoot	Shoot metagenome	4	396	25	4	C	2	H	4	4	396	F4R1	396A	11	F3R4	396B	Fwhlif88	F4R1Fwhlif88	F3R4Fwhlif88	F4R1Fwhlif88_F3R4Fwhlif88	F4R1Fwhlif88_F3R4Fwhlif88
WL397	2015-07-09	Week12	Milford	Root	Root	Root metagenome	1	397	6.3	3	B	10	E	12	3	397	F3R1	397A	10	F2R4	397B	Fwhlif60	F3R1Fwhlif60	F2R4Fwhlif60	F3R1Fwhlif60_F2R4Fwhlif60	F3R1Fwhlif60_F2R4Fwhlif60
WL398	2015-07-09	Week12	Milford	Root	Root	Root metagenome	2	398	25	2	E	8	A	10	2	398	F2R1	398A	9	F1R4	398B	Fwhlif10	F2R1Fwhlif10	F1R4Fwhlif10	F2R1Fwhlif10_F1R4Fwhlif10	F2R1Fwhlif10_F1R4Fwhlif10
WL399	2015-07-09	Week12	Milford	Root	Root	Root metagenome	3	399	25	6	B	7	C	12	6	399	F2R2	399A	13	F1R5	399B	Fwhlif36	F2R2Fwhlif36	F1R5Fwhlif36	F2R2Fwhlif36_F1R5Fwhlif36	F2R2Fwhlif36_F1R5Fwhlif36
WL400	2015-07-09	Week12	Milford	Root	Root	Root metagenome	4	400	25	5	H	8	B	1	6	400	F2R2	400A	13	F1R5	400B	Fwhlif13	F2R2Fwhlif13	F1R5Fwhlif13	F2R2Fwhlif13_F1R5Fwhlif13	F2R2Fwhlif13_F1R5Fwhlif13
WL401	2015-07-09	Week12	Milford	Stem	Stem	Shoot metagenome	1	401	25	4	C	1	G	3	4	401	F4R1	401A	11	F3R4	401B	Fwhlif75	F4R1Fwhlif75	F3R4Fwhlif75	F4R1Fwhlif75_F3R4Fwhlif75	F4R1Fwhlif75_F3R4Fwhlif75
WL402	2015-07-09	Week12	Milford	Stem	Stem	Shoot metagenome	2	402	25	1	E	9	B	10	1	402	F1R1	402A	8	F4R2	402B	Fwhlif22	F1R1Fwhlif22	F4R2Fwhlif22	F1R1Fwhlif22_F4R2Fwhlif22	F1R1Fwhlif22_F4R2Fwhlif22
WL403	2015-07-09	Week12	Milford	Stem	Stem	Shoot metagenome	3	403	25	6	A	8	B	1	7	403	F3R2	403A	14	F2R5	403B	Fwhlif13	F3R2Fwhlif13	F2R5Fwhlif13	F3R2Fwhlif13_F2R5Fwhlif13	F3R2Fwhlif13_F2R5Fwhlif13
WL404	2015-07-09	Week12	Milford	Stem	Stem	Shoot metagenome	4	404	25	2	B	1	B	2	2	404	F2R1	404A	9	F1R4	404B	Fwhlif14	F2R1Fwhlif14	F1R4Fwhlif14	F2R1Fwhlif14_F1R4Fwhlif14	F2R1Fwhlif14_F1R4Fwhlif14
WL405	2015-07-09	Week12	Milford	Head	Head	Shoot metagenome	1	405	25	6	F	11	B	5	7	405	F3R2	405A	14	F2R5	405B	Fwhlif17	F3R2Fwhlif17	F2R5Fwhlif17	F3R2Fwhlif17_F2R5Fwhlif17	F3R2Fwhlif17_F2R5Fwhlif17
WL406	2015-07-09	Week12	Milford	Head	Head	Shoot metagenome	2	406	25	3	A	10	D	12	3	406	F3R1	406A	10	F2R4	406B	Fwhlif48	F3R1Fwhlif48	F2R4Fwhlif48	F3R1Fwhlif48_F2R4Fwhlif48	F3R1Fwhlif48_F2R4Fwhlif48
WL407	2015-07-09	Week12	Milford	Head	Head	Shoot metagenome	3	407	25	6	C	10	F	3	7	407	F3R2	407A	14	F2R5	407B	Fwhlif63	F3R2Fwhlif63	F2R5Fwhlif63	F3R2Fwhlif63_F2R5Fwhlif63	F3R2Fwhlif63_F2R5Fwhlif63
WL408	2015-07-09	Week12	Milford	Head	Head	Shoot metagenome	4	408	25	7	H	5	G	11	7	408	F3R2	408A	14	F2R5	408B	Fwhlif83	F3R2Fwhlif83	F2R5Fwhlif83	F3R2Fwhlif83_F2R5Fwhlif83	F3R2Fwhlif83_F2R5Fwhlif83
WL409	2015-07-16	Week13	Cumulus	Leaves	Shoot	Shoot metagenome	1	409	25	2	A	3	A	4	2	409	F2R1	409A	9	F1R4	409B	Fwhlif4	F2R1Fwhlif4	F1R4Fwhlif4	F2R1Fwhlif4_F1R4Fwhlif4	F2R1Fwhlif4_F1R4Fwhlif4
WL410	2015-07-16	Week13	Cumulus	Leaves	Shoot	Shoot metagenome	2	410	25	5	G	10	A	3	6	410	F2R2	410A	13	F1R5	410B	Fwhlif3	F2R2Fwhlif3	F1R5Fwhlif3	F2R2Fwhlif3_F1R5Fwhlif3	F2R2Fwhlif3_F1R5Fwhlif3
WL411	2015-07-16	Week13	Cumulus	Leaves	Shoot	Shoot metagenome	3	411	25	5	B	11	E	3	6	411	F2R2	411A	13	F1R5	411B	Fwhlif51	F2R2Fwhlif51	F1R5Fwhlif51	F2R2Fwhlif51_F1R5Fwhlif51	F2R2Fwhlif51_F1R5Fwhlif51
WL412	2015-07-16	Week13	Cumulus	Leaves	Shoot	Shoot metagenome	4	412	25	3	A	1	F	2	3	412	F3R1	412A	10	F2R4	412B	Fwhlif62	F3R1Fwhlif62	F2R4Fwhlif62	F3R1Fwhlif62_F2R4Fwhlif62	F3R1Fwhlif62_F2R4Fwhlif62
WL413	2015-07-16	Week13	Cumulus	Root	Root	Root metagenome	1	413	25	4	G	8	H	11	4	413	F4R1	413A	11	F3R4	413B	Fwhlif95	F4R1Fwhlif95	F3R4Fwhlif95	F4R1Fwhlif95_F3R4Fwhlif95	F4R1Fwhlif95_F3R4Fwhlif95
WL414	2015-07-16	Week13	Cumulus	Root	Root	Root metagenome	2	414	25	3	H	6	A	9	3	414	F3R1	414A	10	F2R4	414B	Fwhlif9	F3R1Fwhlif9	F2R4Fwhlif9	F3R1Fwhlif9_F2R4Fwhlif9	F3R1Fwhlif9_F2R4Fwhlif9
WL415	2015-07-16	Week13	Cumulus	Root	Root	Root metagenome	3	415	25	2	D	7	G	8	2	415	F2R1	415A	9	F1R4	415B	Fwhlif80	F2R1Fwhlif80	F1R4Fwhlif80	F2R1Fwhlif80_F1R4Fwhlif80	F2R1Fwhlif80_F1R4Fwhlif80
WL416	2015-07-16	Week13	Cumulus	Root	Root	Root metagenome	4	416	25	1	D	7	G	7	1	416	F1R1	416A	8	F4R2	416B	Fwhlif79	F1R1Fwhlif79	F4R2Fwhlif79	F1R1Fwhlif79_F4R2Fwhlif79	F1R1Fwhlif79_F4R2Fwhlif79
WL417	2015-07-16	Week13	Cumulus	Stem	Stem	Shoot metagenome	1	417	25	2	F	7	A	9	2	417	F2R1	417A	9	F1R4	417B	Fwhlif9	F2R1Fwhlif9	F1R4Fwhlif9	F2R1Fwhlif9_F1R4Fwhlif9	F2R1Fwhlif9_F1R4Fwhlif9
WL418	2015-07-16	Week13	Cumulus	Stem	Stem	Shoot metagenome	2	418	25	6	E	6	E	11	6	418	F2R2	418A	13	F1R5	418B	Fwhlif59	F2R2Fwhlif59	F1R5Fwhlif59	F2R2Fwhlif59_F1R5Fwhlif59	F2R2Fwhlif59_F1R5Fwhlif59
WL419	2015-07-16	Week13	Cumulus	Stem	Stem	Shoot metagenome	3	419	25	2	D	10	A	12	2	419	F2R1	419A	9	F1R4	419B	Fwhlif12	F2R1Fwhlif12	F1R4Fwhlif12	F2R1Fwhlif12_F1R4Fwhlif12	F2R1Fwhlif12_F1R4Fwhlif12
WL420	2015-07-16	Week13	Cumulus	Stem	Stem	Shoot metagenome	4	420	25	6	F	4	E	9	6	420	F2R2	420A	13	F1R5	420B	Fwhlif57	F2R2Fwhlif57	F1R5Fwhlif57	F2R2Fwhlif57_F1R5Fwhlif57	F2R2Fwhlif57_F1R5Fwhlif57
WL421	2015-07-16	Week13	Cumulus	Head	Head	Shoot metagenome	1	421	25	6	F	6	F	11	6	421	F2R2	421A	13	F1R5	421B	Fwhlif71	F2R2Fwhlif71	F1R5Fwhlif71	F2R2Fwhlif71_F1R5Fwhlif71	F2R2Fwhlif71_F1R5Fwhlif71
WL422	2015-07-16	Week13	Cumulus	Head	Head	Shoot metagenome	2	422	25	2	F	8	B	10	2	422	F2R1	422A	9	F1R4	422B	Fwhlif22	F2R1Fwhlif22	F1R4Fwhlif22	F2R1Fwhlif22_F1R4Fwhlif22	F2R1Fwhlif22_F1R4Fwhlif22
WL423	2015-07-16	Week13	Cumulus	Head	Head	Shoot metagenome	3	423	25	3	C	9	F	11	3	423	F3R1	423A	10	F2R4	423B	Fwhlif71	F3R1Fwhlif71	F2R4Fwhlif71	F3R1Fwhlif71_F2R4Fwhlif71	F3R1Fwhlif71_F2R4Fwhlif71
WL424	2015-07-16	Week13	Cumulus	Head	Head	Shoot metagenome	4	424	25	5	F	3	E	7	5	424	F1R2	424A	12	F4R4	424B	Fwhlif55	F1R2Fwhlif55	F4R4Fwhlif55	F1R2Fwhlif55_F4R4Fwhlif55	F1R2Fwhlif55_F4R4Fwhlif55
WL425	2015-07-16	Week13	Quench	Leaves	Shoot	Shoot metagenome	1	425	25	5	E	3	C	7	5	425	F1R2	425A	12	F4R4	425B	Fwhlif31	F1R2Fwhlif31	F4R4Fwhlif31	F1R2Fwhlif31_F4R4Fwhlif31	F1R2Fwhlif31_F4R4Fwhlif31
WL426	2015-07-16	Week13	Quench	Leaves	Shoot	Shoot metagenome	2	426	25	7	F	2	C	8	7	426	F3R2	426A	14	F2R5	426B	Fwhlif32	F3R2Fwhlif32	F2R5Fwhlif32	F3R2Fwhlif32_F2R5Fwhlif32	F3R2Fwhlif32_F2R5Fwhlif32
WL427	2015-07-16	Week13	Quench	Leaves	Shoot	Shoot metagenome	3	427	25	1	E	7	A	8	1	427	F1R1	427A	8	F4R2	427B	Fwhlif8	F1R1Fwhlif8	F4R2Fwhlif8	F1R1Fwhlif8_F4R2Fwhlif8	F1R1Fwhlif8_F4R2Fwhlif8
WL428	2015-07-16	Week13	Quench	Leaves	Shoot	Shoot metagenome	4	428	25	5	C	11	F	3	6	428	F2R2	428A	13	F1R5	428B	Fwhlif63	F2R2Fwhlif63	F1R5Fwhlif63	F2R2Fwhlif63_F1R5Fwhlif63	F2R2Fwhlif63_F1R5Fwhlif63
WL429	2015-07-16	Week13	Quench	Root	Root	Root metagenome	1	429	25	4	F	4	E	7	4	429	F4R1	429A	11	F3R4	429B	Fwhlif55	F4R1Fwhlif55	F3R4Fwhlif55	F4R1Fwhlif55_F3R4Fwhlif55	F4R1Fwhlif55_F3R4Fwhlif55
WL430	2015-07-16	Week13	Quench	Root	Root	Root metagenome	2	430	25	4	G	3	E	6	4	430	F4R1	430A	11	F3R4	430B	Fwhlif54	F4R1Fwhlif54	F3R4Fwhlif54	F4R1Fwhlif54_F3R4Fwhlif54	F4R1Fwhlif54_F3R4Fwhlif54
WL431	2015-07-16	Week13	Quench	Root	Root	Root metagenome	3	431	25	2	C	5	E	6	2	431	F2R1	431A	9	F1R4	431B	Fwhlif54	F2R1Fwhlif54	F1R4Fwhlif54	F2R1Fwhlif54_F1R4Fwhlif54	F2R1Fwhlif54_F1R4Fwhlif54
WL432	2015-07-16	Week13	Quench	Root	Root	Root metagenome	4	432	25	5	A	7	B	11	5	432	F1R2	432A	12	F4R4	432B	Fwhlif23	F1R2Fwhlif23	F4R4Fwhlif23	F1R2Fwhlif23_F4R4Fwhlif23	F1R2Fwhlif23_F4R4Fwhlif23
WL433	2015-07-16	Week13	Quench	Stem	Stem	Shoot metagenome	1	433	25	3	B	1	H	2	3	433	F3R1	433A	10	F2R4	433B	Fwhlif86	F3R1Fwhlif86	F2R4Fwhlif86	F3R1Fwhlif86_F2R4Fwhlif86	F3R1Fwhlif86_F2R4Fwhlif86
WL434	2015-07-16	Week13	Quench	Stem	Stem	Shoot metagenome	2	434	25	4	H	5	G	8	4	434	F4R1	434A	11	F3R4	434B	Fwhlif80	F4R1Fwhlif80	F3R4Fwhlif80	F4R1Fwhlif80_F3R4Fwhlif80	F4R1Fwhlif80_F3R4Fwhlif80
WL435	2015-07-16	Week13	Quench	Stem	Stem	Shoot metagenome	3	435	25	1	B	10	G	10	1	435	F1R1	435A	8	F4R2	435B	Fwhlif82	F1R1Fwhlif82	F4R2Fwhlif82	F1R1Fwhlif82_F4R2Fwhlif82	F1R1Fwhlif82_F4R2Fwhlif82
WL436	2015-07-16	Week13	Quench	Stem	Stem	Shoot metagenome	4	436	25	5	H	9	B	2	6	436	F2R2	436A	13	F1R5	436B	Fwhlif14	F2R2Fwhlif14	F1R5Fwhlif14	F2R2Fwhlif14_F1R5Fwhlif14	F2R2Fwhlif14_F1R5Fwhlif14
WL437	2015-07-16	Week13	Quench	Head	Head	Shoot metagenome	1	437	25	5	D	10	F	2	6	437	F2R2	437A	13	F1R5	437B	Fwhlif62	F2R2Fwhlif62	F1R5Fwhlif62	F2R2Fwhlif62_F1R5Fwhlif62	F2R2Fwhlif62_F1R5Fwhlif62
WL438	2015-07-16	Week13	Quench	Head	Head	Shoot metagenome	2	438	25	3	F	5	F	7	3	438	F3R1	438A	10	F2R4	438B	Fwhlif67	F3R1Fwhlif67	F2R4Fwhlif67	F3R1Fwhlif67_F2R4Fwhlif67	F3R1Fwhlif67_F2R4Fwhlif67
WL439	2015-07-16	Week13	Quench	Head	Head	Shoot metagenome	3	439	25	2	G	5	A	7	2	439	F2R1	439A	9	F1R4	439B	Fwhlif7	F2R1Fwhlif7	F1R4Fwhlif7	F2R1Fwhlif7_F1R4Fwhlif7	F2R1Fwhlif7_F1R4Fwhlif7
WL440	2015-07-16	Week13	Quench	Head	Head	Shoot metagenome	4	440	25	3	F	6	G	8	3	440	F3R1	440A	10	F2R4	440B	Fwhlif80	F3R1Fwhlif80	F2R4Fwhlif80	F3R1Fwhlif80_F2R4Fwhlif80	F3R1Fwhlif80_F2R4Fwhlif80
WL441	2015-07-16	Week13	Milford	Leaves	Shoot	Shoot metagenome	1	441	25	2	A	4	B	5	2	441	F2R1	441A	9	F1R4	441B	Fwhlif17	F2R1Fwhlif17	F1R4Fwhlif17	F2R1Fwhlif17_F1R4Fwhlif17	F2R1Fwhlif17_F1R4Fwhlif17
WL442	2015-07-16	Week13	Milford	Leaves	Shoot	Shoot metagenome	2	442	25	3	F	7	G	9	3	442	F3R1	442A	10	F2R4	442B	Fwhlif81	F3R1Fwhlif81	F2R4Fwhlif81	F3R1Fwhlif81_F2R4Fwhlif81	F3R1Fwhlif81_F2R4Fwhlif81
WL443	2015-07-16	Week13	Milford	Leaves	Shoot	Shoot metagenome	3	443	25	2	G	9	C	11	2	443	F2R1	443A	9	F1R4	443B	Fwhlif35	F2R1Fwhlif35	F1R4Fwhlif35	F2R1Fwhlif35_F1R4Fwhlif35	F2R1Fwhlif35_F1R4Fwhlif35
WL444	2015-07-16	Week13	Milford	Leaves	Shoot	Shoot metagenome	4	444	25	5	G	12	C	5	6	444	F2R2	444A	13	F1R5	444B	Fwhlif29	F2R2Fwhlif29	F1R5Fwhlif29	F2R2Fwhlif29_F1R5Fwhlif29	F2R2Fwhlif29_F1R5Fwhlif29
WL445	2015-07-16	Week13	Milford	Root	Root	Root metagenome	1	445	25	3	H	12	D	3	4	445	F4R1	445A	11	F3R4	445B	Fwhlif39	F4R1Fwhlif39	F3R4Fwhlif39	F4R1Fwhlif39_F3R4Fwhlif39	F4R1Fwhlif39_F3R4Fwhlif39
WL446	2015-07-16	Week13	Milford	Root	Root	Root metagenome	2	446	25	6	F	9	A	3	7	446	F3R2	446A	14	F2R5	446B	Fwhlif3	F3R2Fwhlif3	F2R5Fwhlif3	F3R2Fwhlif3_F2R5Fwhlif3	F3R2Fwhlif3_F2R5Fwhlif3
WL447	2015-07-16	Week13	Milford	Root	Root	Root metagenome	3	447	25	6	F	3	D	8	6	447	F2R2	447A	13	F1R5	447B	Fwhlif44	F2R2Fwhlif44	F1R5Fwhlif44	F2R2Fwhlif44_F1R5Fwhlif44	F2R2Fwhlif44_F1R5Fwhlif44
WL448	2015-07-16	Week13	Milford	Root	Root	Root metagenome	4	448	25	7	G	1	D	7	7	448	F3R2	448A	14	F2R5	448B	Fwhlif43	F3R2Fwhlif43	F2R5Fwhlif43	F3R2Fwhlif43_F2R5Fwhlif43	F3R2Fwhlif43_F2R5Fwhlif43
WL449	2015-07-16	Week13	Milford	Stem	Stem	Shoot metagenome	1	449	25	3	D	5	D	7	3	449	F3R1	449A	10	F2R4	449B	Fwhlif43	F3R1Fwhlif43	F2R4Fwhlif43	F3R1Fwhlif43_F2R4Fwhlif43	F3R1Fwhlif43_F2R4Fwhlif43
WL450	2015-07-16	Week13	Milford	Stem	Stem	Shoot metagenome	2	450	25	2	H	4	B	6	2	450	F2R1	450A	9	F1R4	450B	Fwhlif18	F2R1Fwhlif18	F1R4Fwhlif18	F2R1Fwhlif18_F1R4Fwhlif18	F2R1Fwhlif18_F1R4Fwhlif18
WL451	2015-07-16	Week13	Milford	Stem	Stem	Shoot metagenome	3	451	25	3	D	12	H	2	4	451	F4R1	451A	11	F3R4	451B	Fwhlif86	F4R1Fwhlif86	F3R4Fwhlif86	F4R1Fwhlif86_F3R4Fwhlif86	F4R1Fwhlif86_F3R4Fwhlif86
WL452	2015-07-16	Week13	Milford	Stem	Stem	Shoot metagenome	4	452	25	4	A	12	E	3	5	452	F1R2	452A	12	F4R4	452B	Fwhlif51	F1R2Fwhlif51	F4R4Fwhlif51	F1R2Fwhlif51_F4R4Fwhlif51	F1R2Fwhlif51_F4R4Fwhlif51
WL453	2015-07-16	Week13	Milford	Head	Head	Shoot metagenome	1	453	25	7	E	4	C	10	7	453	F3R2	453A	14	F2R5	453B	Fwhlif34	F3R2Fwhlif34	F2R5Fwhlif34	F3R2Fwhlif34_F2R5Fwhlif34	F3R2Fwhlif34_F2R5Fwhlif34
WL454	2015-07-16	Week13	Milford	Head	Head	Shoot metagenome	2	454	25	4	C	12	G	3	5	454	F1R2	454A	12	F4R4	454B	Fwhlif75	F1R2Fwhlif75	F4R4Fwhlif75	F1R2Fwhlif75_F4R4Fwhlif75	F1R2Fwhlif75_F4R4Fwhlif75
WL455	2015-07-16	Week13	Milford	Head	Head	Shoot metagenome	3	455	25	2	C	8	G	9	2	455	F2R1	455A	9	F1R4	455B	Fwhlif81	F2R1Fwhlif81	F1R4Fwhlif81	F2R1Fwhlif81_F1R4Fwhlif81	F2R1Fwhlif81_F1R4Fwhlif81
WL456	2015-07-16	Week13	Milford	Head	Head	Shoot metagenome	4	456	25	2	B	10	G	11	2	456	F2R1	456A	9	F1R4	456B	Fwhlif83	F2R1Fwhlif83	F1R4Fwhlif83	F2R1Fwhlif83_F1R4Fwhlif83	F2R1Fwhlif83_F1R4Fwhlif83
WL457	2015-07-23	Week14	Cumulus	Leaves	Shoot	Shoot metagenome	1	457	25	1	H	12	G	1	2	457	F2R1	457A	9	F1R4	457B	Fwhlif73	F2R1Fwhlif73	F1R4Fwhlif73	F2R1Fwhlif73_F1R4Fwhlif73	F2R1Fwhlif73_F1R4Fwhlif73
WL458	2015-07-23	Week14	Cumulus	Leaves	Shoot	Shoot metagenome	2	458	25	6	H	2	F	7	6	458	F2R2	458A	13	F1R5	458B	Fwhlif67	F2R2Fwhlif67	F1R5Fwhlif67	F2R2Fwhlif67_F1R5Fwhlif67	F2R2Fwhlif67_F1R5Fwhlif67
WL459	2015-07-23	Week14	Cumulus	Leaves	Shoot	Shoot metagenome	3	459	25	4	D	1	A	4	4	459	F4R1	459A	11	F3R4	459B	Fwhlif4	F4R1Fwhlif4	F3R4Fwhlif4	F4R1Fwhlif4_F3R4Fwhlif4	F4R1Fwhlif4_F3R4Fwhlif4
WL460	2015-07-23	Week14	Cumulus	Leaves	Shoot	Shoot metagenome	4	460	25	2	C	10	H	11	2	460	F2R1	460A	9	F1R4	460B	Fwhlif95	F2R1Fwhlif95	F1R4Fwhlif95	F2R1Fwhlif95_F1R4Fwhlif95	F2R1Fwhlif95_F1R4Fwhlif95
WL461	2015-07-23	Week14	Cumulus	Root	Root	Root metagenome	1	461	25	4	H	3	G	6	4	461	F4R1	461A	11	F3R4	461B	Fwhlif78	F4R1Fwhlif78	F3R4Fwhlif78	F4R1Fwhlif78_F3R4Fwhlif78	F4R1Fwhlif78_F3R4Fwhlif78
WL462	2015-07-23	Week14	Cumulus	Root	Root	Root metagenome	2	462	25	2	B	9	F	10	2	462	F2R1	462A	9	F1R4	462B	Fwhlif70	F2R1Fwhlif70	F1R4Fwhlif70	F2R1Fwhlif70_F1R4Fwhlif70	F2R1Fwhlif70_F1R4Fwhlif70
WL463	2015-07-23	Week14	Cumulus	Root	Root	Root metagenome	3	463	25	1	A	3	C	3	1	463	F1R1	463A	8	F4R2	463B	Fwhlif27	F1R1Fwhlif27	F4R2Fwhlif27	F1R1Fwhlif27_F4R2Fwhlif27	F1R1Fwhlif27_F4R2Fwhlif27
WL464	2015-07-23	Week14	Cumulus	Root	Root	Root metagenome	4	464	15.4	3	H	10	D	1	4	464	F4R1	464A	11	F3R4	464B	Fwhlif37	F4R1Fwhlif37	F3R4Fwhlif37	F4R1Fwhlif37_F3R4Fwhlif37	F4R1Fwhlif37_F3R4Fwhlif37
WL465	2015-07-23	Week14	Cumulus	Stem	Stem	Shoot metagenome	1	465	25	3	G	3	F	5	3	465	F3R1	465A	10	F2R4	465B	Fwhlif65	F3R1Fwhlif65	F2R4Fwhlif65	F3R1Fwhlif65_F2R4Fwhlif65	F3R1Fwhlif65_F2R4Fwhlif65
WL466	2015-07-23	Week14	Cumulus	Stem	Stem	Shoot metagenome	2	466	25	5	D	2	A	6	5	466	F1R2	466A	12	F4R4	466B	Fwhlif6	F1R2Fwhlif6	F4R4Fwhlif6	F1R2Fwhlif6_F4R4Fwhlif6	F1R2Fwhlif6_F4R4Fwhlif6
WL467	2015-07-23	Week14	Cumulus	Stem	Stem	Shoot metagenome	3	467	25	3	G	5	G	7	3	467	F3R1	467A	10	F2R4	467B	Fwhlif79	F3R1Fwhlif79	F2R4Fwhlif79	F3R1Fwhlif79_F2R4Fwhlif79	F3R1Fwhlif79_F2R4Fwhlif79
WL468	2015-07-23	Week14	Cumulus	Stem	Stem	Shoot metagenome	4	468	25	6	D	8	E	1	7	468	F3R2	468A	14	F2R5	468B	Fwhlif49	F3R2Fwhlif49	F2R5Fwhlif49	F3R2Fwhlif49_F2R5Fwhlif49	F3R2Fwhlif49_F2R5Fwhlif49
WL469	2015-07-23	Week14	Cumulus	Head	Head	Shoot metagenome	1	469	25	1	A	10	F	10	1	469	F1R1	469A	8	F4R2	469B	Fwhlif70	F1R1Fwhlif70	F4R2Fwhlif70	F1R1Fwhlif70_F4R2Fwhlif70	F1R1Fwhlif70_F4R2Fwhlif70
WL470	2015-07-23	Week14	Cumulus	Head	Head	Shoot metagenome	2	470	25	7	D	6	D	12	7	470	F3R2	470A	14	F2R5	470B	Fwhlif48	F3R2Fwhlif48	F2R5Fwhlif48	F3R2Fwhlif48_F2R5Fwhlif48	F3R2Fwhlif48_F2R5Fwhlif48
WL471	2015-07-23	Week14	Cumulus	Head	Head	Shoot metagenome	3	471	25	3	F	9	A	12	3	471	F3R1	471A	10	F2R4	471B	Fwhlif12	F3R1Fwhlif12	F2R4Fwhlif12	F3R1Fwhlif12_F2R4Fwhlif12	F3R1Fwhlif12_F2R4Fwhlif12
WL472	2015-07-23	Week14	Cumulus	Head	Head	Shoot metagenome	4	472	25	3	H	7	A	10	3	472	F3R1	472A	10	F2R4	472B	Fwhlif10	F3R1Fwhlif10	F2R4Fwhlif10	F3R1Fwhlif10_F2R4Fwhlif10	F3R1Fwhlif10_F2R4Fwhlif10
WL473	2015-07-23	Week14	Quench	Leaves	Shoot	Shoot metagenome	1	473	25	4	B	11	E	2	5	473	F1R2	473A	12	F4R4	473B	Fwhlif50	F1R2Fwhlif50	F4R4Fwhlif50	F1R2Fwhlif50_F4R4Fwhlif50	F1R2Fwhlif50_F4R4Fwhlif50
WL474	2015-07-23	Week14	Quench	Leaves	Shoot	Shoot metagenome	2	474	25	1	D	1	E	1	1	474	F1R1	474A	8	F4R2	474B	Fwhlif49	F1R1Fwhlif49	F4R2Fwhlif49	F1R1Fwhlif49_F4R2Fwhlif49	F1R1Fwhlif49_F4R2Fwhlif49
WL475	2015-07-23	Week14	Quench	Leaves	Shoot	Shoot metagenome	3	475	25	6	B	11	F	4	7	475	F3R2	475A	14	F2R5	475B	Fwhlif64	F3R2Fwhlif64	F2R5Fwhlif64	F3R2Fwhlif64_F2R5Fwhlif64	F3R2Fwhlif64_F2R5Fwhlif64
WL476	2015-07-23	Week14	Quench	Leaves	Shoot	Shoot metagenome	4	476	25	7	E	1	B	7	7	476	F3R2	476A	14	F2R5	476B	Fwhlif19	F3R2Fwhlif19	F2R5Fwhlif19	F3R2Fwhlif19_F2R5Fwhlif19	F3R2Fwhlif19_F2R5Fwhlif19
WL477	2015-07-23	Week14	Quench	Root	Root	Root metagenome	1	477	25	5	F	5	F	9	5	477	F1R2	477A	12	F4R4	477B	Fwhlif69	F1R2Fwhlif69	F4R4Fwhlif69	F1R2Fwhlif69_F4R4Fwhlif69	F1R2Fwhlif69_F4R4Fwhlif69
WL478	2015-07-23	Week14	Quench	Root	Root	Root metagenome	2	478	25	4	C	10	F	1	5	478	F1R2	478A	12	F4R4	478B	Fwhlif61	F1R2Fwhlif61	F4R4Fwhlif61	F1R2Fwhlif61_F4R4Fwhlif61	F1R2Fwhlif61_F4R4Fwhlif61
WL479	2015-07-23	Week14	Quench	Root	Root	Root metagenome	3	479	25	1	B	6	E	6	1	479	F1R1	479A	8	F4R2	479B	Fwhlif54	F1R1Fwhlif54	F4R2Fwhlif54	F1R1Fwhlif54_F4R2Fwhlif54	F1R1Fwhlif54_F4R2Fwhlif54
WL480	2015-07-23	Week14	Quench	Root	Root	Root metagenome	4	480	25	2	G	8	C	10	2	480	F2R1	480A	9	F1R4	480B	Fwhlif34	F2R1Fwhlif34	F1R4Fwhlif34	F2R1Fwhlif34_F1R4Fwhlif34	F2R1Fwhlif34_F1R4Fwhlif34
WL481	2015-07-23	Week14	Quench	Stem	Stem	Shoot metagenome	1	481	25	1	B	5	D	5	1	481	F1R1	481A	8	F4R2	481B	Fwhlif41	F1R1Fwhlif41	F4R2Fwhlif41	F1R1Fwhlif41_F4R2Fwhlif41	F1R1Fwhlif41_F4R2Fwhlif41
WL482	2015-07-23	Week14	Quench	Stem	Stem	Shoot metagenome	2	482	25	1	D	5	G	5	1	482	F1R1	482A	8	F4R2	482B	Fwhlif77	F1R1Fwhlif77	F4R2Fwhlif77	F1R1Fwhlif77_F4R2Fwhlif77	F1R1Fwhlif77_F4R2Fwhlif77
WL483	2015-07-23	Week14	Quench	Stem	Stem	Shoot metagenome	3	483	25	2	G	2	G	3	2	483	F2R1	483A	9	F1R4	483B	Fwhlif75	F2R1Fwhlif75	F1R4Fwhlif75	F2R1Fwhlif75_F1R4Fwhlif75	F2R1Fwhlif75_F1R4Fwhlif75
WL484	2015-07-23	Week14	Quench	Stem	Stem	Shoot metagenome	4	484	25	5	C	5	C	9	5	484	F1R2	484A	12	F4R4	484B	Fwhlif33	F1R2Fwhlif33	F4R4Fwhlif33	F1R2Fwhlif33_F4R4Fwhlif33	F1R2Fwhlif33_F4R4Fwhlif33
WL485	2015-07-23	Week14	Quench	Head	Head	Shoot metagenome	1	485	25	6	A	3	G	7	6	485	F2R2	485A	13	F1R5	485B	Fwhlif79	F2R2Fwhlif79	F1R5Fwhlif79	F2R2Fwhlif79_F1R5Fwhlif79	F2R2Fwhlif79_F1R5Fwhlif79
WL486	2015-07-23	Week14	Quench	Head	Head	Shoot metagenome	2	486	25	5	A	8	B	12	5	486	F1R2	486A	12	F4R4	486B	Fwhlif24	F1R2Fwhlif24	F4R4Fwhlif24	F1R2Fwhlif24_F4R4Fwhlif24	F1R2Fwhlif24_F4R4Fwhlif24
WL487	2015-07-23	Week14	Quench	Head	Head	Shoot metagenome	3	487	25	7	A	3	F	8	7	487	F3R2	487A	14	F2R5	487B	Fwhlif68	F3R2Fwhlif68	F2R5Fwhlif68	F3R2Fwhlif68_F2R5Fwhlif68	F3R2Fwhlif68_F2R5Fwhlif68
WL488	2015-07-23	Week14	Quench	Head	Head	Shoot metagenome	4	488	25	3	F	12	B	3	4	488	F4R1	488A	11	F3R4	488B	Fwhlif15	F4R1Fwhlif15	F3R4Fwhlif15	F4R1Fwhlif15_F3R4Fwhlif15	F4R1Fwhlif15_F3R4Fwhlif15
WL489	2015-07-23	Week14	Milford	Leaves	Shoot	Shoot metagenome	1	489	25	1	E	1	F	1	1	489	F1R1	489A	8	F4R2	489B	Fwhlif61	F1R1Fwhlif61	F4R2Fwhlif61	F1R1Fwhlif61_F4R2Fwhlif61	F1R1Fwhlif61_F4R2Fwhlif61
WL490	2015-07-23	Week14	Milford	Leaves	Shoot	Shoot metagenome	2	490	25	5	D	5	D	9	5	490	F1R2	490A	12	F4R4	490B	Fwhlif45	F1R2Fwhlif45	F4R4Fwhlif45	F1R2Fwhlif45_F4R4Fwhlif45	F1R2Fwhlif45_F4R4Fwhlif45
WL491	2015-07-23	Week14	Milford	Leaves	Shoot	Shoot metagenome	3	491	25	2	E	3	E	4	2	491	F2R1	491A	9	F1R4	491B	Fwhlif52	F2R1Fwhlif52	F1R4Fwhlif52	F2R1Fwhlif52_F1R4Fwhlif52	F2R1Fwhlif52_F1R4Fwhlif52
WL492	2015-07-23	Week14	Milford	Leaves	Shoot	Shoot metagenome	4	492	25	7	G	4	F	10	7	492	F3R2	492A	14	F2R5	492B	Fwhlif70	F3R2Fwhlif70	F2R5Fwhlif70	F3R2Fwhlif70_F2R5Fwhlif70	F3R2Fwhlif70_F2R5Fwhlif70
WL493	2015-07-23	Week14	Milford	Root	Root	Root metagenome	1	493	25	3	E	2	C	4	3	493	F3R1	493A	10	F2R4	493B	Fwhlif28	F3R1Fwhlif28	F2R4Fwhlif28	F3R1Fwhlif28_F2R4Fwhlif28	F3R1Fwhlif28_F2R4Fwhlif28
WL494	2015-07-23	Week14	Milford	Root	Root	Root metagenome	2	494	25	1	E	6	H	6	1	494	F1R1	494A	8	F4R2	494B	Fwhlif90	F1R1Fwhlif90	F4R2Fwhlif90	F1R1Fwhlif90_F4R2Fwhlif90	F1R1Fwhlif90_F4R2Fwhlif90
WL495	2015-07-23	Week14	Milford	Root	Root	Root metagenome	3	495	25	4	D	3	B	6	4	495	F4R1	495A	11	F3R4	495B	Fwhlif18	F4R1Fwhlif18	F3R4Fwhlif18	F4R1Fwhlif18_F3R4Fwhlif18	F4R1Fwhlif18_F3R4Fwhlif18
WL496	2015-07-23	Week14	Milford	Root	Root	Root metagenome	4	496	25	6	B	4	A	9	6	496	F2R2	496A	13	F1R5	496B	Fwhlif9	F2R2Fwhlif9	F1R5Fwhlif9	F2R2Fwhlif9_F1R5Fwhlif9	F2R2Fwhlif9_F1R5Fwhlif9
WL497	2015-07-23	Week14	Milford	Stem	Stem	Shoot metagenome	1	497	25	6	B	9	E	2	7	497	F3R2	497A	14	F2R5	497B	Fwhlif50	F3R2Fwhlif50	F2R5Fwhlif50	F3R2Fwhlif50_F2R5Fwhlif50	F3R2Fwhlif50_F2R5Fwhlif50
WL498	2015-07-23	Week14	Milford	Stem	Stem	Shoot metagenome	2	498	25	5	E	12	A	5	6	498	F2R2	498A	13	F1R5	498B	Fwhlif5	F2R2Fwhlif5	F1R5Fwhlif5	F2R2Fwhlif5_F1R5Fwhlif5	F2R2Fwhlif5_F1R5Fwhlif5
WL499	2015-07-23	Week14	Milford	Stem	Stem	Shoot metagenome	3	499	25	2	H	12	E	2	3	499	F3R1	499A	10	F2R4	499B	Fwhlif50	F3R1Fwhlif50	F2R4Fwhlif50	F3R1Fwhlif50_F2R4Fwhlif50	F3R1Fwhlif50_F2R4Fwhlif50
WL500	2015-07-23	Week14	Milford	Stem	Stem	Shoot metagenome	4	500	25	4	E	9	G	12	4	500	F4R1	500A	11	F3R4	500B	Fwhlif84	F4R1Fwhlif84	F3R4Fwhlif84	F4R1Fwhlif84_F3R4Fwhlif84	F4R1Fwhlif84_F3R4Fwhlif84
WL501	2015-07-23	Week14	Milford	Head	Head	Shoot metagenome	1	501	25	4	G	10	B	2	5	501	F1R2	501A	12	F4R4	501B	Fwhlif14	F1R2Fwhlif14	F4R4Fwhlif14	F1R2Fwhlif14_F4R4Fwhlif14	F1R2Fwhlif14_F4R4Fwhlif14
WL502	2015-07-23	Week14	Milford	Head	Head	Shoot metagenome	2	502	25	1	E	3	G	3	1	502	F1R1	502A	8	F4R2	502B	Fwhlif75	F1R1Fwhlif75	F4R2Fwhlif75	F1R1Fwhlif75_F4R2Fwhlif75	F1R1Fwhlif75_F4R2Fwhlif75
WL503	2015-07-23	Week14	Milford	Head	Head	Shoot metagenome	3	503	25	4	A	7	A	10	4	503	F4R1	503A	11	F3R4	503B	Fwhlif10	F4R1Fwhlif10	F3R4Fwhlif10	F4R1Fwhlif10_F3R4Fwhlif10	F4R1Fwhlif10_F3R4Fwhlif10
WL504	2015-07-23	Week14	Milford	Head	Head	Shoot metagenome	4	504	25	3	D	7	E	9	3	504	F3R1	504A	10	F2R4	504B	Fwhlif57	F3R1Fwhlif57	F2R4Fwhlif57	F3R1Fwhlif57_F2R4Fwhlif57	F3R1Fwhlif57_F2R4Fwhlif57
WL505	2015-07-30	Week15	Cumulus	Leaves	Shoot	Shoot metagenome	1	505	25	3	A	6	A	8	3	505	F3R1	505A	10	F2R4	505B	Fwhlif8	F3R1Fwhlif8	F2R4Fwhlif8	F3R1Fwhlif8_F2R4Fwhlif8	F3R1Fwhlif8_F2R4Fwhlif8
WL506	2015-07-30	Week15	Cumulus	Leaves	Shoot	Shoot metagenome	2	506	25	4	B	2	G	4	4	506	F4R1	506A	11	F3R4	506B	Fwhlif76	F4R1Fwhlif76	F3R4Fwhlif76	F4R1Fwhlif76_F3R4Fwhlif76	F4R1Fwhlif76_F3R4Fwhlif76
WL507	2015-07-30	Week15	Cumulus	Leaves	Shoot	Shoot metagenome	3	507	25	5	D	6	E	10	5	507	F1R2	507A	12	F4R4	507B	Fwhlif58	F1R2Fwhlif58	F4R4Fwhlif58	F1R2Fwhlif58_F4R4Fwhlif58	F1R2Fwhlif58_F4R4Fwhlif58
WL508	2015-07-30	Week15	Cumulus	Leaves	Shoot	Shoot metagenome	4	508	25	5	E	4	D	8	5	508	F1R2	508A	12	F4R4	508B	Fwhlif44	F1R2Fwhlif44	F4R4Fwhlif44	F1R2Fwhlif44_F4R4Fwhlif44	F1R2Fwhlif44_F4R4Fwhlif44
WL509	2015-07-30	Week15	Cumulus	Root	Root	Root metagenome	1	509	25	3	G	6	H	8	3	509	F3R1	509A	10	F2R4	509B	Fwhlif92	F3R1Fwhlif92	F2R4Fwhlif92	F3R1Fwhlif92_F2R4Fwhlif92	F3R1Fwhlif92_F2R4Fwhlif92
WL510	2015-07-30	Week15	Cumulus	Root	Root	Root metagenome	2	510	25	1	A	6	D	6	1	510	F1R1	510A	8	F4R2	510B	Fwhlif42	F1R1Fwhlif42	F4R2Fwhlif42	F1R1Fwhlif42_F4R2Fwhlif42	F1R1Fwhlif42_F4R2Fwhlif42
WL511	2015-07-30	Week15	Cumulus	Root	Root	Root metagenome	3	511	25	1	F	6	A	7	1	511	F1R1	511A	8	F4R2	511B	Fwhlif7	F1R1Fwhlif7	F4R2Fwhlif7	F1R1Fwhlif7_F4R2Fwhlif7	F1R1Fwhlif7_F4R2Fwhlif7
WL512	2015-07-30	Week15	Cumulus	Root	Root	Root metagenome	4	512	25	3	E	10	A	1	4	512	F4R1	512A	11	F3R4	512B	Fwhlif1	F4R1Fwhlif1	F3R4Fwhlif1	F4R1Fwhlif1_F3R4Fwhlif1	F4R1Fwhlif1_F3R4Fwhlif1
WL513	2015-07-30	Week15	Cumulus	Stem	Stem	Shoot metagenome	1	513	25	3	C	12	G	2	4	513	F4R1	513A	11	F3R4	513B	Fwhlif74	F4R1Fwhlif74	F3R4Fwhlif74	F4R1Fwhlif74_F3R4Fwhlif74	F4R1Fwhlif74_F3R4Fwhlif74
WL514	2015-07-30	Week15	Cumulus	Stem	Stem	Shoot metagenome	2	514	25	4	H	4	G	7	4	514	F4R1	514A	11	F3R4	514B	Fwhlif79	F4R1Fwhlif79	F3R4Fwhlif79	F4R1Fwhlif79_F3R4Fwhlif79	F4R1Fwhlif79_F3R4Fwhlif79
WL515	2015-07-30	Week15	Cumulus	Stem	Stem	Shoot metagenome	3	515	25	5	G	8	A	1	6	515	F2R2	515A	13	F1R5	515B	Fwhlif1	F2R2Fwhlif1	F1R5Fwhlif1	F2R2Fwhlif1_F1R5Fwhlif1	F2R2Fwhlif1_F1R5Fwhlif1
WL516	2015-07-30	Week15	Cumulus	Stem	Stem	Shoot metagenome	4	516	25	1	H	6	C	7	1	516	F1R1	516A	8	F4R2	516B	Fwhlif31	F1R1Fwhlif31	F4R2Fwhlif31	F1R1Fwhlif31_F4R2Fwhlif31	F1R1Fwhlif31_F4R2Fwhlif31
WL517	2015-07-30	Week15	Cumulus	Head	Head	Shoot metagenome	1	517	25	6	H	11	D	5	7	517	F3R2	517A	14	F2R5	517B	Fwhlif41	F3R2Fwhlif41	F2R5Fwhlif41	F3R2Fwhlif41_F2R5Fwhlif41	F3R2Fwhlif41_F2R5Fwhlif41
WL518	2015-07-30	Week15	Cumulus	Head	Head	Shoot metagenome	2	518	25	5	C	1	H	4	5	518	F1R2	518A	12	F4R4	518B	Fwhlif88	F1R2Fwhlif88	F4R4Fwhlif88	F1R2Fwhlif88_F4R4Fwhlif88	F1R2Fwhlif88_F4R4Fwhlif88
WL519	2015-07-30	Week15	Cumulus	Head	Head	Shoot metagenome	3	519	25	4	D	2	A	5	4	519	F4R1	519A	11	F3R4	519B	Fwhlif5	F4R1Fwhlif5	F3R4Fwhlif5	F4R1Fwhlif5_F3R4Fwhlif5	F4R1Fwhlif5_F3R4Fwhlif5
WL520	2015-07-30	Week15	Cumulus	Head	Head	Shoot metagenome	4	520	25	3	E	5	E	7	3	520	F3R1	520A	10	F2R4	520B	Fwhlif55	F3R1Fwhlif55	F2R4Fwhlif55	F3R1Fwhlif55_F2R4Fwhlif55	F3R1Fwhlif55_F2R4Fwhlif55
WL521	2015-07-30	Week15	Quench	Leaves	Shoot	Shoot metagenome	1	521	25	2	A	8	D	9	2	521	F2R1	521A	9	F1R4	521B	Fwhlif45	F2R1Fwhlif45	F1R4Fwhlif45	F2R1Fwhlif45_F1R4Fwhlif45	F2R1Fwhlif45_F1R4Fwhlif45
WL522	2015-07-30	Week15	Quench	Leaves	Shoot	Shoot metagenome	2	522	25	2	B	7	E	8	2	522	F2R1	522A	9	F1R4	522B	Fwhlif56	F2R1Fwhlif56	F1R4Fwhlif56	F2R1Fwhlif56_F1R4Fwhlif56	F2R1Fwhlif56_F1R4Fwhlif56
WL523	2015-07-30	Week15	Quench	Leaves	Shoot	Shoot metagenome	3	523	25	2	E	12	B	2	3	523	F3R1	523A	10	F2R4	523B	Fwhlif14	F3R1Fwhlif14	F2R4Fwhlif14	F3R1Fwhlif14_F2R4Fwhlif14	F3R1Fwhlif14_F2R4Fwhlif14
WL524	2015-07-30	Week15	Quench	Leaves	Shoot	Shoot metagenome	4	524	25	1	E	2	F	2	1	524	F1R1	524A	8	F4R2	524B	Fwhlif62	F1R1Fwhlif62	F4R2Fwhlif62	F1R1Fwhlif62_F4R2Fwhlif62	F1R1Fwhlif62_F4R2Fwhlif62
WL525	2015-07-30	Week15	Quench	Root	Root	Root metagenome	1	525	25	4	B	4	A	7	4	525	F4R1	525A	11	F3R4	525B	Fwhlif7	F4R1Fwhlif7	F3R4Fwhlif7	F4R1Fwhlif7_F3R4Fwhlif7	F4R1Fwhlif7_F3R4Fwhlif7
WL526	2015-07-30	Week15	Quench	Root	Root	Root metagenome	2	526	25	6	F	10	A	4	7	526	F3R2	526A	14	F2R5	526B	Fwhlif4	F3R2Fwhlif4	F2R5Fwhlif4	F3R2Fwhlif4_F2R5Fwhlif4	F3R2Fwhlif4_F2R5Fwhlif4
WL527	2015-07-30	Week15	Quench	Root	Root	Root metagenome	3	527	25	1	A	11	G	11	1	527	F1R1	527A	8	F4R2	527B	Fwhlif83	F1R1Fwhlif83	F4R2Fwhlif83	F1R1Fwhlif83_F4R2Fwhlif83	F1R1Fwhlif83_F4R2Fwhlif83
WL528	2015-07-30	Week15	Quench	Root	Root	Root metagenome	4	528	25	7	G	6	G	12	7	528	F3R2	528A	14	F2R5	528B	Fwhlif84	F3R2Fwhlif84	F2R5Fwhlif84	F3R2Fwhlif84_F2R5Fwhlif84	F3R2Fwhlif84_F2R5Fwhlif84
WL529	2015-07-30	Week15	Quench	Stem	Stem	Shoot metagenome	1	529	25	6	D	9	G	2	7	529	F3R2	529A	14	F2R5	529B	Fwhlif74	F3R2Fwhlif74	F2R5Fwhlif74	F3R2Fwhlif74_F2R5Fwhlif74	F3R2Fwhlif74_F2R5Fwhlif74
WL530	2015-07-30	Week15	Quench	Stem	Stem	Shoot metagenome	2	530	25	5	H	10	B	3	6	530	F2R2	530A	13	F1R5	530B	Fwhlif15	F2R2Fwhlif15	F1R5Fwhlif15	F2R2Fwhlif15_F1R5Fwhlif15	F2R2Fwhlif15_F1R5Fwhlif15
WL531	2015-07-30	Week15	Quench	Stem	Stem	Shoot metagenome	3	531	25	5	F	11	B	4	6	531	F2R2	531A	13	F1R5	531B	Fwhlif16	F2R2Fwhlif16	F1R5Fwhlif16	F2R2Fwhlif16_F1R5Fwhlif16	F2R2Fwhlif16_F1R5Fwhlif16
WL532	2015-07-30	Week15	Quench	Stem	Stem	Shoot metagenome	4	532	25	1	B	2	C	2	1	532	F1R1	532A	8	F4R2	532B	Fwhlif26	F1R1Fwhlif26	F4R2Fwhlif26	F1R1Fwhlif26_F4R2Fwhlif26	F1R1Fwhlif26_F4R2Fwhlif26
WL533	2015-07-30	Week15	Quench	Head	Head	Shoot metagenome	1	533	25	3	G	10	C	1	4	533	F4R1	533A	11	F3R4	533B	Fwhlif25	F4R1Fwhlif25	F3R4Fwhlif25	F4R1Fwhlif25_F3R4Fwhlif25	F4R1Fwhlif25_F3R4Fwhlif25
WL534	2015-07-30	Week15	Quench	Head	Head	Shoot metagenome	2	534	25	1	C	4	E	4	1	534	F1R1	534A	8	F4R2	534B	Fwhlif52	F1R1Fwhlif52	F4R2Fwhlif52	F1R1Fwhlif52_F4R2Fwhlif52	F1R1Fwhlif52_F4R2Fwhlif52
WL535	2015-07-30	Week15	Quench	Head	Head	Shoot metagenome	3	535	25	4	G	9	A	1	5	535	F1R2	535A	12	F4R4	535B	Fwhlif1	F1R2Fwhlif1	F4R4Fwhlif1	F1R2Fwhlif1_F4R4Fwhlif1	F1R2Fwhlif1_F4R4Fwhlif1
WL536	2015-07-30	Week15	Quench	Head	Head	Shoot metagenome	4	536	25	6	E	3	C	8	6	536	F2R2	536A	13	F1R5	536B	Fwhlif32	F2R2Fwhlif32	F1R5Fwhlif32	F2R2Fwhlif32_F1R5Fwhlif32	F2R2Fwhlif32_F1R5Fwhlif32
WL537	2015-07-30	Week15	Milford	Leaves	Shoot	Shoot metagenome	1	537	25	3	F	8	H	10	3	537	F3R1	537A	10	F2R4	537B	Fwhlif94	F3R1Fwhlif94	F2R4Fwhlif94	F3R1Fwhlif94_F2R4Fwhlif94	F3R1Fwhlif94_F2R4Fwhlif94
WL538	2015-07-30	Week15	Milford	Leaves	Shoot	Shoot metagenome	2	538	25	2	C	12	H	1	3	538	F3R1	538A	10	F2R4	538B	Fwhlif85	F3R1Fwhlif85	F2R4Fwhlif85	F3R1Fwhlif85_F2R4Fwhlif85	F3R1Fwhlif85_F2R4Fwhlif85
WL539	2015-07-30	Week15	Milford	Leaves	Shoot	Shoot metagenome	3	539	25	7	H	4	G	10	7	539	F3R2	539A	14	F2R5	539B	Fwhlif82	F3R2Fwhlif82	F2R5Fwhlif82	F3R2Fwhlif82_F2R5Fwhlif82	F3R2Fwhlif82_F2R5Fwhlif82
WL540	2015-07-30	Week15	Milford	Leaves	Shoot	Shoot metagenome	4	540	25	7	B	1	G	6	7	540	F3R2	540A	14	F2R5	540B	Fwhlif78	F3R2Fwhlif78	F2R5Fwhlif78	F3R2Fwhlif78_F2R5Fwhlif78	F3R2Fwhlif78_F2R5Fwhlif78
WL541	2015-07-30	Week15	Milford	Root	Root	Root metagenome	1	541	25	4	D	12	H	3	5	541	F1R2	541A	12	F4R4	541B	Fwhlif87	F1R2Fwhlif87	F4R4Fwhlif87	F1R2Fwhlif87_F4R4Fwhlif87	F1R2Fwhlif87_F4R4Fwhlif87
WL542	2015-07-30	Week15	Milford	Root	Root	Root metagenome	2	542	25	6	C	3	A	8	6	542	F2R2	542A	13	F1R5	542B	Fwhlif8	F2R2Fwhlif8	F1R5Fwhlif8	F2R2Fwhlif8_F1R5Fwhlif8	F2R2Fwhlif8_F1R5Fwhlif8
WL543	2015-07-30	Week15	Milford	Root	Root	Root metagenome	3	543	25	5	H	11	D	4	6	543	F2R2	543A	13	F1R5	543B	Fwhlif40	F2R2Fwhlif40	F1R5Fwhlif40	F2R2Fwhlif40_F1R5Fwhlif40	F2R2Fwhlif40_F1R5Fwhlif40
WL544	2015-07-30	Week15	Milford	Root	Root	Root metagenome	4	544	25	1	F	10	C	11	1	544	F1R1	544A	8	F4R2	544B	Fwhlif35	F1R1Fwhlif35	F4R2Fwhlif35	F1R1Fwhlif35_F4R2Fwhlif35	F1R1Fwhlif35_F4R2Fwhlif35
WL545	2015-07-30	Week15	Milford	Stem	Stem	Shoot metagenome	1	545	25	5	D	3	B	7	5	545	F1R2	545A	12	F4R4	545B	Fwhlif19	F1R2Fwhlif19	F4R4Fwhlif19	F1R2Fwhlif19_F4R4Fwhlif19	F1R2Fwhlif19_F4R4Fwhlif19
WL546	2015-07-30	Week15	Milford	Stem	Stem	Shoot metagenome	2	546	25	6	B	3	H	7	6	546	F2R2	546A	13	F1R5	546B	Fwhlif91	F2R2Fwhlif91	F1R5Fwhlif91	F2R2Fwhlif91_F1R5Fwhlif91	F2R2Fwhlif91_F1R5Fwhlif91
WL547	2015-07-30	Week15	Milford	Stem	Stem	Shoot metagenome	3	547	25	6	C	2	H	6	6	547	F2R2	547A	13	F1R5	547B	Fwhlif90	F2R2Fwhlif90	F1R5Fwhlif90	F2R2Fwhlif90_F1R5Fwhlif90	F2R2Fwhlif90_F1R5Fwhlif90
WL548	2015-07-30	Week15	Milford	Stem	Stem	Shoot metagenome	4	548	25	2	F	3	F	4	2	548	F2R1	548A	9	F1R4	548B	Fwhlif64	F2R1Fwhlif64	F1R4Fwhlif64	F2R1Fwhlif64_F1R4Fwhlif64	F2R1Fwhlif64_F1R4Fwhlif64
WL549	2015-07-30	Week15	Milford	Head	Head	Shoot metagenome	1	549	25	6	A	1	F	5	6	549	F2R2	549A	13	F1R5	549B	Fwhlif65	F2R2Fwhlif65	F1R5Fwhlif65	F2R2Fwhlif65_F1R5Fwhlif65	F2R2Fwhlif65_F1R5Fwhlif65
WL550	2015-07-30	Week15	Milford	Head	Head	Shoot metagenome	2	550	25	1	H	2	A	3	1	550	F1R1	550A	8	F4R2	550B	Fwhlif3	F1R1Fwhlif3	F4R2Fwhlif3	F1R1Fwhlif3_F4R2Fwhlif3	F1R1Fwhlif3_F4R2Fwhlif3
WL551	2015-07-30	Week15	Milford	Head	Head	Shoot metagenome	3	551	25	4	E	5	D	8	4	551	F4R1	551A	11	F3R4	551B	Fwhlif44	F4R1Fwhlif44	F3R4Fwhlif44	F4R1Fwhlif44_F3R4Fwhlif44	F4R1Fwhlif44_F3R4Fwhlif44
WL552	2015-07-30	Week15	Milford	Head	Head	Shoot metagenome	4	552	25	4	A	3	G	5	4	552	F4R1	552A	11	F3R4	552B	Fwhlif77	F4R1Fwhlif77	F3R4Fwhlif77	F4R1Fwhlif77_F3R4Fwhlif77	F4R1Fwhlif77_F3R4Fwhlif77
WL553	2015-08-06	Week16	Cumulus	Leaves	Shoot	Shoot metagenome	1	553	25	6	F	8	H	1	7	553	F3R2	553A	14	F2R5	553B	Fwhlif85	F3R2Fwhlif85	F2R5Fwhlif85	F3R2Fwhlif85_F2R5Fwhlif85	F3R2Fwhlif85_F2R5Fwhlif85
WL554	2015-08-06	Week16	Cumulus	Leaves	Shoot	Shoot metagenome	2	554	25	2	B	8	F	9	2	554	F2R1	554A	9	F1R4	554B	Fwhlif69	F2R1Fwhlif69	F1R4Fwhlif69	F2R1Fwhlif69_F1R4Fwhlif69	F2R1Fwhlif69_F1R4Fwhlif69
WL555	2015-08-06	Week16	Cumulus	Leaves	Shoot	Shoot metagenome	3	555	25	7	D	2	A	8	7	555	F3R2	555A	14	F2R5	555B	Fwhlif8	F3R2Fwhlif8	F2R5Fwhlif8	F3R2Fwhlif8_F2R5Fwhlif8	F3R2Fwhlif8_F2R5Fwhlif8
WL556	2015-08-06	Week16	Cumulus	Leaves	Shoot	Shoot metagenome	4	556	25	4	G	2	E	5	4	556	F4R1	556A	11	F3R4	556B	Fwhlif53	F4R1Fwhlif53	F3R4Fwhlif53	F4R1Fwhlif53_F3R4Fwhlif53	F4R1Fwhlif53_F3R4Fwhlif53
WL557	2015-08-06	Week16	Cumulus	Root	Root	Root metagenome	1	557	25	5	C	2	H	5	5	557	F1R2	557A	12	F4R4	557B	Fwhlif89	F1R2Fwhlif89	F4R4Fwhlif89	F1R2Fwhlif89_F4R4Fwhlif89	F1R2Fwhlif89_F4R4Fwhlif89
WL558	2015-08-06	Week16	Cumulus	Root	Root	Root metagenome	2	558	25	2	B	3	B	4	2	558	F2R1	558A	9	F1R4	558B	Fwhlif16	F2R1Fwhlif16	F1R4Fwhlif16	F2R1Fwhlif16_F1R4Fwhlif16	F2R1Fwhlif16_F1R4Fwhlif16
WL559	2015-08-06	Week16	Cumulus	Root	Root	Root metagenome	3	559	25	1	F	4	H	4	1	559	F1R1	559A	8	F4R2	559B	Fwhlif88	F1R1Fwhlif88	F4R2Fwhlif88	F1R1Fwhlif88_F4R2Fwhlif88	F1R1Fwhlif88_F4R2Fwhlif88
WL560	2015-08-06	Week16	Cumulus	Root	Root	Root metagenome	4	560	25	3	C	4	B	6	3	560	F3R1	560A	10	F2R4	560B	Fwhlif18	F3R1Fwhlif18	F2R4Fwhlif18	F3R1Fwhlif18_F2R4Fwhlif18	F3R1Fwhlif18_F2R4Fwhlif18
WL561	2015-08-06	Week16	Cumulus	Stem	Stem	Shoot metagenome	1	561	25	2	F	4	H	5	2	561	F2R1	561A	9	F1R4	561B	Fwhlif89	F2R1Fwhlif89	F1R4Fwhlif89	F2R1Fwhlif89_F1R4Fwhlif89	F2R1Fwhlif89_F1R4Fwhlif89
WL562	2015-08-06	Week16	Cumulus	Stem	Stem	Shoot metagenome	2	562	25	5	D	1	A	5	5	562	F1R2	562A	12	F4R4	562B	Fwhlif5	F1R2Fwhlif5	F4R4Fwhlif5	F1R2Fwhlif5_F4R4Fwhlif5	F1R2Fwhlif5_F4R4Fwhlif5
WL563	2015-08-06	Week16	Cumulus	Stem	Stem	Shoot metagenome	3	563	25	6	H	3	G	8	6	563	F2R2	563A	13	F1R5	563B	Fwhlif80	F2R2Fwhlif80	F1R5Fwhlif80	F2R2Fwhlif80_F1R5Fwhlif80	F2R2Fwhlif80_F1R5Fwhlif80
WL564	2015-08-06	Week16	Cumulus	Stem	Stem	Shoot metagenome	4	564	25	6	C	6	C	11	6	564	F2R2	564A	13	F1R5	564B	Fwhlif35	F2R2Fwhlif35	F1R5Fwhlif35	F2R2Fwhlif35_F1R5Fwhlif35	F2R2Fwhlif35_F1R5Fwhlif35
WL565	2015-08-06	Week16	Cumulus	Head	Head	Shoot metagenome	1	565	25	4	D	10	G	1	5	565	F1R2	565A	12	F4R4	565B	Fwhlif73	F1R2Fwhlif73	F4R4Fwhlif73	F1R2Fwhlif73_F4R4Fwhlif73	F1R2Fwhlif73_F4R4Fwhlif73
WL566	2015-08-06	Week16	Cumulus	Head	Head	Shoot metagenome	2	566	25	4	D	11	H	2	5	566	F1R2	566A	12	F4R4	566B	Fwhlif86	F1R2Fwhlif86	F4R4Fwhlif86	F1R2Fwhlif86_F4R4Fwhlif86	F1R2Fwhlif86_F4R4Fwhlif86
WL567	2015-08-06	Week16	Cumulus	Head	Head	Shoot metagenome	3	567	25	4	F	1	C	4	4	567	F4R1	567A	11	F3R4	567B	Fwhlif28	F4R1Fwhlif28	F3R4Fwhlif28	F4R1Fwhlif28_F3R4Fwhlif28	F4R1Fwhlif28_F3R4Fwhlif28
WL568	2015-08-06	Week16	Cumulus	Head	Head	Shoot metagenome	4	568	25	3	B	12	F	2	4	568	F4R1	568A	11	F3R4	568B	Fwhlif62	F4R1Fwhlif62	F3R4Fwhlif62	F4R1Fwhlif62_F3R4Fwhlif62	F4R1Fwhlif62_F3R4Fwhlif62
WL569	2015-08-06	Week16	Quench	Leaves	Shoot	Shoot metagenome	1	569	25	1	C	5	E	5	1	569	F1R1	569A	8	F4R2	569B	Fwhlif53	F1R1Fwhlif53	F4R2Fwhlif53	F1R1Fwhlif53_F4R2Fwhlif53	F1R1Fwhlif53_F4R2Fwhlif53
WL570	2015-08-06	Week16	Quench	Leaves	Shoot	Shoot metagenome	2	570	25	2	G	6	B	8	2	570	F2R1	570A	9	F1R4	570B	Fwhlif20	F2R1Fwhlif20	F1R4Fwhlif20	F2R1Fwhlif20_F1R4Fwhlif20	F2R1Fwhlif20_F1R4Fwhlif20
WL571	2015-08-06	Week16	Quench	Leaves	Shoot	Shoot metagenome	3	571	25	5	E	1	B	5	5	571	F1R2	571A	12	F4R4	571B	Fwhlif17	F1R2Fwhlif17	F4R4Fwhlif17	F1R2Fwhlif17_F4R4Fwhlif17	F1R2Fwhlif17_F4R4Fwhlif17
WL572	2015-08-06	Week16	Quench	Leaves	Shoot	Shoot metagenome	4	572	25	4	F	9	H	12	4	572	F4R1	572A	11	F3R4	572B	Fwhlif96	F4R1Fwhlif96	F3R4Fwhlif96	F4R1Fwhlif96_F3R4Fwhlif96	F4R1Fwhlif96_F3R4Fwhlif96
WL573	2015-08-06	Week16	Quench	Root	Root	Root metagenome	1	573	25	3	F	4	F	6	3	573	F3R1	573A	10	F2R4	573B	Fwhlif66	F3R1Fwhlif66	F2R4Fwhlif66	F3R1Fwhlif66_F2R4Fwhlif66	F3R1Fwhlif66_F2R4Fwhlif66
WL574	2015-08-06	Week16	Quench	Root	Root	Root metagenome	2	574	25	5	E	11	H	3	6	574	F2R2	574A	13	F1R5	574B	Fwhlif87	F2R2Fwhlif87	F1R5Fwhlif87	F2R2Fwhlif87_F1R5Fwhlif87	F2R2Fwhlif87_F1R5Fwhlif87
WL575	2015-08-06	Week16	Quench	Root	Root	Root metagenome	3	575	25	4	C	5	B	8	4	575	F4R1	575A	11	F3R4	575B	Fwhlif20	F4R1Fwhlif20	F3R4Fwhlif20	F4R1Fwhlif20_F3R4Fwhlif20	F4R1Fwhlif20_F3R4Fwhlif20
WL576	2015-08-06	Week16	Quench	Root	Root	Root metagenome	4	576	16.7	6	G	7	H	12	6	576	F2R2	576A	13	F1R5	576B	Fwhlif96	F2R2Fwhlif96	F1R5Fwhlif96	F2R2Fwhlif96_F1R5Fwhlif96	F2R2Fwhlif96_F1R5Fwhlif96
WL577	2015-08-06	Week16	Quench	Stem	Stem	Shoot metagenome	1	577	25	5	H	7	A	12	5	577	F1R2	577A	12	F4R4	577B	Fwhlif12	F1R2Fwhlif12	F4R4Fwhlif12	F1R2Fwhlif12_F4R4Fwhlif12	F1R2Fwhlif12_F4R4Fwhlif12
WL578	2015-08-06	Week16	Quench	Stem	Stem	Shoot metagenome	2	578	25	7	D	4	B	10	7	578	F3R2	578A	14	F2R5	578B	Fwhlif22	F3R2Fwhlif22	F2R5Fwhlif22	F3R2Fwhlif22_F2R5Fwhlif22	F3R2Fwhlif22_F2R5Fwhlif22
WL579	2015-08-06	Week16	Quench	Stem	Stem	Shoot metagenome	3	579	25	4	C	4	B	7	4	579	F4R1	579A	11	F3R4	579B	Fwhlif19	F4R1Fwhlif19	F3R4Fwhlif19	F4R1Fwhlif19_F3R4Fwhlif19	F4R1Fwhlif19_F3R4Fwhlif19
WL580	2015-08-06	Week16	Quench	Stem	Stem	Shoot metagenome	4	580	25	5	C	8	E	12	5	580	F1R2	580A	12	F4R4	580B	Fwhlif60	F1R2Fwhlif60	F4R4Fwhlif60	F1R2Fwhlif60_F4R4Fwhlif60	F1R2Fwhlif60_F4R4Fwhlif60
WL581	2015-08-06	Week16	Quench	Head	Head	Shoot metagenome	1	581	25	1	C	1	C	1	1	581	F1R1	581A	8	F4R2	581B	Fwhlif25	F1R1Fwhlif25	F4R2Fwhlif25	F1R1Fwhlif25_F4R2Fwhlif25	F1R1Fwhlif25_F4R2Fwhlif25
WL582	2015-08-06	Week16	Quench	Head	Head	Shoot metagenome	2	582	25	1	G	5	B	6	1	582	F1R1	582A	8	F4R2	582B	Fwhlif18	F1R1Fwhlif18	F4R2Fwhlif18	F1R1Fwhlif18_F4R2Fwhlif18	F1R1Fwhlif18_F4R2Fwhlif18
WL583	2015-08-06	Week16	Quench	Head	Head	Shoot metagenome	3	583	25	7	G	5	F	11	7	583	F3R2	583A	14	F2R5	583B	Fwhlif71	F3R2Fwhlif71	F2R5Fwhlif71	F3R2Fwhlif71_F2R5Fwhlif71	F3R2Fwhlif71_F2R5Fwhlif71
WL584	2015-08-06	Week16	Quench	Head	Head	Shoot metagenome	4	584	25	4	B	7	B	10	4	584	F4R1	584A	11	F3R4	584B	Fwhlif22	F4R1Fwhlif22	F3R4Fwhlif22	F4R1Fwhlif22_F3R4Fwhlif22	F4R1Fwhlif22_F3R4Fwhlif22
WL585	2015-08-06	Week16	Milford	Leaves	Shoot	Shoot metagenome	1	585	25	2	D	9	H	10	2	585	F2R1	585A	9	F1R4	585B	Fwhlif94	F2R1Fwhlif94	F1R4Fwhlif94	F2R1Fwhlif94_F1R4Fwhlif94	F2R1Fwhlif94_F1R4Fwhlif94
WL586	2015-08-06	Week16	Milford	Leaves	Shoot	Shoot metagenome	2	586	25	3	D	2	B	4	3	586	F3R1	586A	10	F2R4	586B	Fwhlif16	F3R1Fwhlif16	F2R4Fwhlif16	F3R1Fwhlif16_F2R4Fwhlif16	F3R1Fwhlif16_F2R4Fwhlif16
WL587	2015-08-06	Week16	Milford	Leaves	Shoot	Shoot metagenome	3	587	25	1	D	2	E	2	1	587	F1R1	587A	8	F4R2	587B	Fwhlif50	F1R1Fwhlif50	F4R2Fwhlif50	F1R1Fwhlif50_F4R2Fwhlif50	F1R1Fwhlif50_F4R2Fwhlif50
WL588	2015-08-06	Week16	Milford	Leaves	Shoot	Shoot metagenome	4	588	25	5	G	1	D	5	5	588	F1R2	588A	12	F4R4	588B	Fwhlif41	F1R2Fwhlif41	F4R4Fwhlif41	F1R2Fwhlif41_F4R4Fwhlif41	F1R2Fwhlif41_F4R4Fwhlif41
WL589	2015-08-06	Week16	Milford	Root	Root	Root metagenome	1	589	25	2	H	6	C	8	2	589	F2R1	589A	9	F1R4	589B	Fwhlif32	F2R1Fwhlif32	F1R4Fwhlif32	F2R1Fwhlif32_F1R4Fwhlif32	F2R1Fwhlif32_F1R4Fwhlif32
WL590	2015-08-06	Week16	Milford	Root	Root	Root metagenome	2	590	25	2	B	6	D	7	2	590	F2R1	590A	9	F1R4	590B	Fwhlif43	F2R1Fwhlif43	F1R4Fwhlif43	F2R1Fwhlif43_F1R4Fwhlif43	F2R1Fwhlif43_F1R4Fwhlif43
WL591	2015-08-06	Week16	Milford	Root	Root	Root metagenome	3	591	25	5	F	1	C	5	5	591	F1R2	591A	12	F4R4	591B	Fwhlif29	F1R2Fwhlif29	F4R4Fwhlif29	F1R2Fwhlif29_F4R4Fwhlif29	F1R2Fwhlif29_F4R4Fwhlif29
WL592	2015-08-06	Week16	Milford	Root	Root	Root metagenome	4	592	25	6	D	12	H	5	7	592	F3R2	592A	14	F2R5	592B	Fwhlif89	F3R2Fwhlif89	F2R5Fwhlif89	F3R2Fwhlif89_F2R5Fwhlif89	F3R2Fwhlif89_F2R5Fwhlif89
WL593	2015-08-06	Week16	Milford	Stem	Stem	Shoot metagenome	1	593	25	3	F	3	E	5	3	593	F3R1	593A	10	F2R4	593B	Fwhlif53	F3R1Fwhlif53	F2R4Fwhlif53	F3R1Fwhlif53_F2R4Fwhlif53	F3R1Fwhlif53_F2R4Fwhlif53
WL594	2015-08-06	Week16	Milford	Stem	Stem	Shoot metagenome	2	594	25	1	H	9	E	10	1	594	F1R1	594A	8	F4R2	594B	Fwhlif58	F1R1Fwhlif58	F4R2Fwhlif58	F1R1Fwhlif58_F4R2Fwhlif58	F1R1Fwhlif58_F4R2Fwhlif58
WL595	2015-08-06	Week16	Milford	Stem	Stem	Shoot metagenome	3	595	25	6	E	7	F	12	6	595	F2R2	595A	13	F1R5	595B	Fwhlif72	F2R2Fwhlif72	F1R5Fwhlif72	F2R2Fwhlif72_F1R5Fwhlif72	F2R2Fwhlif72_F1R5Fwhlif72
WL596	2015-08-06	Week16	Milford	Stem	Stem	Shoot metagenome	4	596	25	4	E	11	A	3	5	596	F1R2	596A	12	F4R4	596B	Fwhlif3	F1R2Fwhlif3	F4R4Fwhlif3	F1R2Fwhlif3_F4R4Fwhlif3	F1R2Fwhlif3_F4R4Fwhlif3
WL597	2015-08-06	Week16	Milford	Head	Head	Shoot metagenome	1	597	25	5	G	7	H	11	5	597	F1R2	597A	12	F4R4	597B	Fwhlif95	F1R2Fwhlif95	F4R4Fwhlif95	F1R2Fwhlif95_F4R4Fwhlif95	F1R2Fwhlif95_F4R4Fwhlif95
WL598	2015-08-06	Week16	Milford	Head	Head	Shoot metagenome	2	598	25	5	E	7	F	11	5	598	F1R2	598A	12	F4R4	598B	Fwhlif71	F1R2Fwhlif71	F4R4Fwhlif71	F1R2Fwhlif71_F4R4Fwhlif71	F1R2Fwhlif71_F4R4Fwhlif71
WL599	2015-08-06	Week16	Milford	Head	Head	Shoot metagenome	3	599	25	2	E	9	A	11	2	599	F2R1	599A	9	F1R4	599B	Fwhlif11	F2R1Fwhlif11	F1R4Fwhlif11	F2R1Fwhlif11_F1R4Fwhlif11	F2R1Fwhlif11_F1R4Fwhlif11
WL600	2015-08-06	Week16	Milford	Head	Head	Shoot metagenome	4	600	25	5	E	9	G	1	6	600	F2R2	600A	13	F1R5	600B	Fwhlif73	F2R2Fwhlif73	F1R5Fwhlif73	F2R2Fwhlif73_F1R5Fwhlif73	F2R2Fwhlif73_F1R5Fwhlif73
WL601	2015-08-13	Week17	Cumulus	Head	Head	Shoot metagenome	1	601	25	2	A	2	A	3	2	601	F2R1	601A	9	F1R4	601B	Fwhlif3	F2R1Fwhlif3	F1R4Fwhlif3	F2R1Fwhlif3_F1R4Fwhlif3	F2R1Fwhlif3_F1R4Fwhlif3
WL602	2015-08-13	Week17	Cumulus	Head	Head	Shoot metagenome	2	602	25	3	G	4	G	6	3	602	F3R1	602A	10	F2R4	602B	Fwhlif78	F3R1Fwhlif78	F2R4Fwhlif78	F3R1Fwhlif78_F2R4Fwhlif78	F3R1Fwhlif78_F2R4Fwhlif78
WL603	2015-08-13	Week17	Cumulus	Head	Head	Shoot metagenome	3	603	25	3	A	5	A	7	3	603	F3R1	603A	10	F2R4	603B	Fwhlif7	F3R1Fwhlif7	F2R4Fwhlif7	F3R1Fwhlif7_F2R4Fwhlif7	F3R1Fwhlif7_F2R4Fwhlif7
WL604	2015-08-13	Week17	Cumulus	Head	Head	Shoot metagenome	4	604	25	6	G	12	C	6	7	604	F3R2	604A	14	F2R5	604B	Fwhlif30	F3R2Fwhlif30	F2R5Fwhlif30	F3R2Fwhlif30_F2R5Fwhlif30	F3R2Fwhlif30_F2R5Fwhlif30
WL605	2015-08-13	Week17	Quench	Head	Head	Shoot metagenome	1	605	25	7	H	3	F	9	7	605	F3R2	605A	14	F2R5	605B	Fwhlif69	F3R2Fwhlif69	F2R5Fwhlif69	F3R2Fwhlif69_F2R5Fwhlif69	F3R2Fwhlif69_F2R5Fwhlif69
WL606	2015-08-13	Week17	Quench	Head	Head	Shoot metagenome	2	606	25	6	D	4	C	9	6	606	F2R2	606A	13	F1R5	606B	Fwhlif33	F2R2Fwhlif33	F1R5Fwhlif33	F2R2Fwhlif33_F1R5Fwhlif33	F2R2Fwhlif33_F1R5Fwhlif33
WL607	2015-08-13	Week17	Quench	Head	Head	Shoot metagenome	3	607	25	7	E	5	D	11	7	607	F3R2	607A	14	F2R5	607B	Fwhlif47	F3R2Fwhlif47	F2R5Fwhlif47	F3R2Fwhlif47_F2R5Fwhlif47	F3R2Fwhlif47_F2R5Fwhlif47
WL608	2015-08-13	Week17	Quench	Head	Head	Shoot metagenome	4	608	25	3	H	4	H	6	3	608	F3R1	608A	10	F2R4	608B	Fwhlif90	F3R1Fwhlif90	F2R4Fwhlif90	F3R1Fwhlif90_F2R4Fwhlif90	F3R1Fwhlif90_F2R4Fwhlif90
WL609	2015-08-13	Week17	Milford	Head	Head	Shoot metagenome	1	609	25	4	A	11	D	2	5	609	F1R2	609A	12	F4R4	609B	Fwhlif38	F1R2Fwhlif38	F4R4Fwhlif38	F1R2Fwhlif38_F4R4Fwhlif38	F1R2Fwhlif38_F4R4Fwhlif38
WL610	2015-08-13	Week17	Milford	Head	Head	Shoot metagenome	2	610	25	2	F	9	B	11	2	610	F2R1	610A	9	F1R4	610B	Fwhlif23	F2R1Fwhlif23	F1R4Fwhlif23	F2R1Fwhlif23_F1R4Fwhlif23	F2R1Fwhlif23_F1R4Fwhlif23
WL611	2015-08-13	Week17	Milford	Head	Head	Shoot metagenome	3	611	25	6	D	5	C	10	6	611	F2R2	611A	13	F1R5	611B	Fwhlif34	F2R2Fwhlif34	F1R5Fwhlif34	F2R2Fwhlif34_F1R5Fwhlif34	F2R2Fwhlif34_F1R5Fwhlif34
WL612	2015-08-13	Week17	Milford	Head	Head	Shoot metagenome	4	612	25	2	F	5	H	6	2	612	F2R1	612A	9	F1R4	612B	Fwhlif90	F2R1Fwhlif90	F1R4Fwhlif90	F2R1Fwhlif90_F1R4Fwhlif90	F2R1Fwhlif90_F1R4Fwhlif90
WL613	2015-08-21	Week18	Cumulus	Head	Head	Shoot metagenome	1	613	25	2	C	4	E	5	2	613	F2R1	613A	9	F1R4	613B	Fwhlif53	F2R1Fwhlif53	F1R4Fwhlif53	F2R1Fwhlif53_F1R4Fwhlif53	F2R1Fwhlif53_F1R4Fwhlif53
WL614	2015-08-21	Week18	Cumulus	Head	Head	Shoot metagenome	2	614	25	6	A	7	A	12	6	614	F2R2	614A	13	F1R5	614B	Fwhlif12	F2R2Fwhlif12	F1R5Fwhlif12	F2R2Fwhlif12_F1R5Fwhlif12	F2R2Fwhlif12_F1R5Fwhlif12
WL615	2015-08-21	Week18	Cumulus	Head	Head	Shoot metagenome	3	615	25	5	B	12	F	4	6	615	F2R2	615A	13	F1R5	615B	Fwhlif64	F2R2Fwhlif64	F1R5Fwhlif64	F2R2Fwhlif64_F1R5Fwhlif64	F2R2Fwhlif64_F1R5Fwhlif64
WL616	2015-08-21	Week18	Cumulus	Head	Head	Shoot metagenome	4	616	25	5	B	2	G	5	5	616	F1R2	616A	12	F4R4	616B	Fwhlif77	F1R2Fwhlif77	F4R4Fwhlif77	F1R2Fwhlif77_F4R4Fwhlif77	F1R2Fwhlif77_F4R4Fwhlif77
WL617	2015-08-21	Week18	Quench	Head	Head	Shoot metagenome	1	617	25	4	A	10	D	1	5	617	F1R2	617A	12	F4R4	617B	Fwhlif37	F1R2Fwhlif37	F4R4Fwhlif37	F1R2Fwhlif37_F4R4Fwhlif37	F1R2Fwhlif37_F4R4Fwhlif37
WL618	2015-08-21	Week18	Quench	Head	Head	Shoot metagenome	2	618	25	4	A	6	H	8	4	618	F4R1	618A	11	F3R4	618B	Fwhlif92	F4R1Fwhlif92	F3R4Fwhlif92	F4R1Fwhlif92_F3R4Fwhlif92	F4R1Fwhlif92_F3R4Fwhlif92
WL619	2015-08-21	Week18	Quench	Head	Head	Shoot metagenome	3	619	25	3	C	5	C	7	3	619	F3R1	619A	10	F2R4	619B	Fwhlif31	F3R1Fwhlif31	F2R4Fwhlif31	F3R1Fwhlif31_F2R4Fwhlif31	F3R1Fwhlif31_F2R4Fwhlif31
WL620	2015-08-21	Week18	Quench	Head	Head	Shoot metagenome	4	620	25	4	E	8	F	11	4	620	F4R1	620A	11	F3R4	620B	Fwhlif71	F4R1Fwhlif71	F3R4Fwhlif71	F4R1Fwhlif71_F3R4Fwhlif71	F4R1Fwhlif71_F3R4Fwhlif71
WL621	2015-08-21	Week18	Milford	Head	Head	Shoot metagenome	1	621	25	3	H	3	G	5	3	621	F3R1	621A	10	F2R4	621B	Fwhlif77	F3R1Fwhlif77	F2R4Fwhlif77	F3R1Fwhlif77_F2R4Fwhlif77	F3R1Fwhlif77_F2R4Fwhlif77
WL622	2015-08-21	Week18	Milford	Head	Head	Shoot metagenome	2	622	25	4	B	1	F	3	4	622	F4R1	622A	11	F3R4	622B	Fwhlif63	F4R1Fwhlif63	F3R4Fwhlif63	F4R1Fwhlif63_F3R4Fwhlif63	F4R1Fwhlif63_F3R4Fwhlif63
WL623	2015-08-21	Week18	Milford	Head	Head	Shoot metagenome	3	623	25	4	E	4	D	7	4	623	F4R1	623A	11	F3R4	623B	Fwhlif43	F4R1Fwhlif43	F3R4Fwhlif43	F4R1Fwhlif43_F3R4Fwhlif43	F4R1Fwhlif43_F3R4Fwhlif43
WL624	2015-08-21	Week18	Milford	Head	Head	Shoot metagenome	4	624	25	2	F	1	F	2	2	624	F2R1	624A	9	F1R4	624B	Fwhlif62	F2R1Fwhlif62	F1R4Fwhlif62	F2R1Fwhlif62_F1R4Fwhlif62	F2R1Fwhlif62_F1R4Fwhlif62

## Sheet: Sheet1
Primers
SampleID	BarcodeSequence	LinkerPrimerSequence	ReversePrimer
F1R1	TCAT	GTGARTCATCGAATCTTTG	AGGAGTCCTCCGCTTATTGATATGC
F2R1	AAGTGA	GTGARTCATCGAATCTTTG	AGGAGTCCTCCGCTTATTGATATGC
F3R1	TGCGAGA	GTGARTCATCGAATCTTTG	AGGAGTCCTCCGCTTATTGATATGC
F4R1	GACATCCA	GTGARTCATCGAATCTTTG	AGGAGTCCTCCGCTTATTGATATGC
F1R2	TCAT	GTGARTCATCGAATCTTTG	CGCTCATCCTCCGCTTATTGATATGC
F2R2	AAGTGA	GTGARTCATCGAATCTTTG	CGCTCATCCTCCGCTTATTGATATGC
F3R2	TGCGAGA	GTGARTCATCGAATCTTTG	CGCTCATCCTCCGCTTATTGATATGC
F4R2	GACATCCA	GTGARTCATCGAATCTTTG	CGCTCATCCTCCGCTTATTGATATGC
F1R4	TCAT	GTGARTCATCGAATCTTTG	TTGACCAGTCCTCCGCTTATTGATATGC
F2R4	AAGTGA	GTGARTCATCGAATCTTTG	TTGACCAGTCCTCCGCTTATTGATATGC
F3R4	TGCGAGA	GTGARTCATCGAATCTTTG	TTGACCAGTCCTCCGCTTATTGATATGC
F4R4	GACATCCA	GTGARTCATCGAATCTTTG	TTGACCAGTCCTCCGCTTATTGATATGC
F1R5	TCAT	GTGARTCATCGAATCTTTG	ACGCTCGACATCCTCCGCTTATTGATATGC
F2R5	AAGTGA	GTGARTCATCGAATCTTTG	ACGCTCGACATCCTCCGCTTATTGATATGC

## Sheet: Replication_before_after_filter
SN	Week	PartE	Cultivar	Replication_beforeFilter	Replication_AfterFilter
1	Week1	Root	Cumulus	4	4
2	Week1	Root	Milford	4	3
3	Week1	Root	Quench	4	4
4	Week1	Top	Cumulus	4	4
5	Week1	Top	Milford	4	4
6	Week1	Top	Quench	4	3
7	Week2	Root	Cumulus	4	4
8	Week2	Root	Milford	4	3
9	Week2	Root	Quench	4	4
10	Week2	Top	Cumulus	4	4
11	Week2	Top	Milford	4	3
12	Week2	Top	Quench	4	4
13	Week3	Root	Cumulus	4	4
14	Week3	Root	Milford	4	4
15	Week3	Root	Quench	4	3
16	Week3	Top	Cumulus	4	3
17	Week3	Top	Milford	4	3
18	Week3	Top	Quench	4	4
19	Week4	Root	Cumulus	4	4
20	Week4	Root	Milford	4	4
21	Week4	Root	Quench	4	3
22	Week4	Top	Cumulus	4	3
23	Week4	Top	Milford	4	3
24	Week4	Top	Quench	4	2
25	Week5	Root	Cumulus	4	4
26	Week5	Root	Milford	4	4
27	Week5	Root	Quench	4	4
28	Week5	Top	Cumulus	4	2
29	Week5	Top	Milford	4	4
30	Week5	Top	Quench	4	4
31	Week6	Root	Cumulus	4	3
32	Week6	Root	Milford	4	4
33	Week6	Root	Quench	4	4
34	Week6	Top	Cumulus	4	4
35	Week6	Top	Milford	4	2
36	Week6	Top	Quench	4	4
37	Week7	Leaves	Cumulus	4	3
38	Week7	Leaves	Milford	4	3
39	Week7	Leaves	Quench	4	3
40	Week7	Root	Cumulus	4	4
41	Week7	Root	Milford	4	4
42	Week7	Root	Quench	4	3
43	Week7	Stem	Cumulus	4	3
44	Week7	Stem	Milford	4	2
45	Week7	Stem	Quench	4	3
46	Week8	Leaves	Cumulus	4	2
47	Week8	Leaves	Milford	4	4
48	Week8	Leaves	Quench	4	4
49	Week8	Root	Cumulus	4	3
50	Week8	Root	Milford	4	4
51	Week8	Root	Quench	4	4
52	Week8	Stem	Cumulus	4	4
53	Week8	Stem	Milford	4	3
54	Week8	Stem	Quench	4	4
55	Week9	Head	Cumulus	4	4
56	Week9	Head	Milford	4	4
57	Week9	Head	Quench	4	4
58	Week9	Leaves	Cumulus	4	4
59	Week9	Leaves	Milford	4	4
60	Week9	Leaves	Quench	4	4
61	Week9	Root	Cumulus	4	4
62	Week9	Root	Milford	4	4
63	Week9	Root	Quench	4	4
64	Week9	Stem	Cumulus	4	4
65	Week9	Stem	Milford	4	2
66	Week9	Stem	Quench	4	4
67	Week10	Head	Cumulus	4	3
68	Week10	Head	Milford	4	2
69	Week10	Head	Quench	4	3
70	Week10	Leaves	Cumulus	4	4
71	Week10	Leaves	Milford	4	4
72	Week10	Leaves	Quench	4	3
73	Week10	Root	Cumulus	4	3
74	Week10	Root	Milford	4	3
75	Week10	Root	Quench	4	4
76	Week10	Stem	Cumulus	4	3
77	Week10	Stem	Milford	4	2
78	Week10	Stem	Quench	4	4
79	Week11	Head	Cumulus	4	4
80	Week11	Head	Milford	4	4
81	Week11	Head	Quench	4	4
82	Week11	Leaves	Cumulus	4	4
83	Week11	Leaves	Milford	4	4
84	Week11	Leaves	Quench	4	4
85	Week11	Root	Cumulus	4	4
86	Week11	Root	Milford	4	3
87	Week11	Root	Quench	4	4
88	Week11	Stem	Cumulus	4	4
89	Week11	Stem	Milford	4	3
90	Week11	Stem	Quench	4	4
91	Week12	Head	Cumulus	4	4
92	Week12	Head	Milford	4	4
93	Week12	Head	Quench	4	4
94	Week12	Leaves	Cumulus	4	4
95	Week12	Leaves	Milford	4	4
96	Week12	Leaves	Quench	4	4
97	Week12	Root	Cumulus	4	4
98	Week12	Root	Milford	4	4
99	Week12	Root	Quench	4	4
100	Week12	Stem	Cumulus	4	4
101	Week12	Stem	Milford	4	4
102	Week12	Stem	Quench	4	3
103	Week13	Head	Cumulus	4	4
104	Week13	Head	Milford	4	3
105	Week13	Head	Quench	4	4
106	Week13	Leaves	Cumulus	4	4
107	Week13	Leaves	Milford	4	4
108	Week13	Leaves	Quench	4	4
109	Week13	Root	Cumulus	4	4
110	Week13	Root	Milford	4	4
111	Week13	Root	Quench	4	4
112	Week13	Stem	Cumulus	4	4
113	Week13	Stem	Milford	4	4
114	Week13	Stem	Quench	4	4
115	Week14	Head	Cumulus	4	4
116	Week14	Head	Milford	4	4
117	Week14	Head	Quench	4	4
118	Week14	Leaves	Cumulus	4	4
119	Week14	Leaves	Milford	4	4
120	Week14	Leaves	Quench	4	4
121	Week14	Root	Cumulus	4	4
122	Week14	Root	Milford	4	4
123	Week14	Root	Quench	4	4
124	Week14	Stem	Cumulus	4	4
125	Week14	Stem	Milford	4	4
126	Week14	Stem	Quench	4	3
127	Week15	Head	Cumulus	4	4
128	Week15	Head	Milford	4	4
129	Week15	Head	Quench	4	4
130	Week15	Leaves	Cumulus	4	4
131	Week15	Leaves	Milford	4	4
132	Week15	Leaves	Quench	4	4
133	Week15	Root	Cumulus	4	3
134	Week15	Root	Milford	4	4
135	Week15	Root	Quench	4	4
136	Week15	Stem	Cumulus	4	4
137	Week15	Stem	Milford	4	4
138	Week15	Stem	Quench	4	4
139	Week16	Head	Cumulus	4	3
140	Week16	Head	Milford	4	3
141	Week16	Head	Quench	4	4
142	Week16	Leaves	Cumulus	4	4
143	Week16	Leaves	Milford	4	4
144	Week16	Leaves	Quench	4	4
145	Week16	Root	Cumulus	4	3
146	Week16	Root	Milford	4	4
147	Week16	Root	Quench	4	4
148	Week16	Stem	Cumulus	4	4
149	Week16	Stem	Milford	4	4
150	Week16	Stem	Quench	4	4
151	Week17	Head	Cumulus	4	4
152	Week17	Head	Milford	4	4
153	Week17	Head	Quench	4	4
154	Week18	Head	Cumulus	4	3
155	Week18	Head	Milford	4	4
156	Week18	Head	Quench	4	4
			Total	624	573
